# Supplementary material for: Photodeoxygenation of dinaphthothiophene, benzophenanthrothiophene, and benzonaphthothiophene S-oxides
Source: Royal Society of Chemistry journal article supplement (doi:10.1039/c5pp00466g), 2016-05-11
Supplement: c5pp00466g1.pdf [file c5pp00466g1.pdf]

Supporting information for:

**Photodeoxygenation of dinaphthothiophene, benzophenanthrothiophene,  
and benzonaphthothiophene S-oxides**

X. Zheng,<sup>a</sup> S. M. Baumann, S. M. Chintala, K. D. Galloway, J. B. Slaughter, and R. D. McCulla<sup>c</sup>

Saint Louis University, Saint Louis, Missouri, 63103 USA

## Table of Contents

|                               |     |
|-------------------------------|-----|
| Supporting Figures and Tables | S3  |
| Synthetic Methods             | S4  |
| Supporting Spectra            | S17 |
| Computational Results         | S39 |

## Supporting Figures and Tables.

**Table S1.** Comparison of toluene oxidation product yields by **DBTO** and thiophene *S*-oxides **1-5** with including error associated with the ratio of methyl to ring oxidation.<sup>a</sup>

| Sulfoxide                | PhCHO   | BnOH     | o-cresol | m- & p-cresol <sup>b</sup> | Total %yield oxidized toluene | Oxidation CH <sub>3</sub> :Ring <sup>c</sup> |
|--------------------------|---------|----------|----------|----------------------------|-------------------------------|----------------------------------------------|
| <b>DBTO</b> <sup>d</sup> | 14 ± 3  | 10 ± 1   | 25 ± 3   | 24 ± 6                     | 73 ± 7                        | 1 : 2.0 ± 0.4                                |
| <b>DBTO</b> <sup>e</sup> | 17 ± 3  | 13 ± 4   | 26 ± 5   | 22 ± 5                     | 78 ± 9                        | 1 : 1.6 ± 0.3                                |
| <b>DBTO</b> <sup>f</sup> | 3±1     | 5±1      | 20±1     | 18±1                       | 46 ± 2                        | 1 : 4.8 ± 0.9                                |
| <b>1</b> <sup>f</sup>    | 2.4±0.5 | 5.1±0.8  | 9.8±0.8  | 5.6±0.3                    | 22.9 ± 1.3                    | 1 : 2.0 ± 0.3                                |
| <b>2</b> <sup>f</sup>    | 1.7±0.4 | 3.4±0.6  | 5.5±0.3  | 2.7±0.2                    | 13.3 ± 0.8                    | 1 : 1.6 ± 0.2                                |
| <b>3</b> <sup>f</sup>    | 2.1±0.5 | 4±1      | 3.8±0.9  | 2.4±0.6                    | 12.3 ± 1.6                    | 1 : 1.0 ± 0.3                                |
| <b>4</b> <sup>f</sup>    | 8.3±1.1 | 11.8±1.8 | 2.8±0.4  | 1.3±0.2                    | 24.2 ± 2.2                    | 4.9 ± 0.7 : 1                                |
| <b>5</b> <sup>f</sup>    | 1.6±0.2 | 2.2±0.5  | 3.3±0.0  | 2.4±0.1                    | 9.5 ± 0.5                     | 1 : 1.5 ± 0.2                                |

<sup>a</sup> Yields of toluene oxidation products relative to the formation of the corresponding sulfide of **DBTO** and thiophene *S*-oxides **1-5**. The oxidation products are benzaldehyde (PhCHO), benzyl alcohol (BnOH), and all three cresol isomers. <sup>b</sup> Measured as a single peak by GC-FID. <sup>c</sup> Ratio of PhCHO plus BnOH yields to combined cresol yields. <sup>d</sup> Values from reference 5. <sup>e</sup> Values from reference 24. <sup>f</sup> This work.

**Table S2.** TD-B3LYP and B3LYP/6-31G(d,p) excited state energies relative to *S*<sub>0</sub>.

| Sulfoxide   | <i>S</i> <sub>1</sub> <sup>a</sup> | <i>T</i> <sub>1</sub> <sup>a</sup> | <i>T</i> <sub>2</sub> ( <i>S</i> <sub>0</sub> ) <sup>b</sup> | <i>T</i> <sub>2</sub> ( <i>T</i> <sub>1</sub> ) <sup>c</sup> | <i>T</i> <sub>2</sub> ( <i>S</i> <sub>1</sub> ) <sup>d</sup> | <i>S</i> <sub>1</sub> - <i>T</i> <sub>2</sub> ( <i>S</i> <sub>0</sub> ) <sup>e</sup> | <i>S</i> <sub>1</sub> - <i>T</i> <sub>2</sub> ( <i>S</i> <sub>1</sub> ) <sup>f</sup> | <i>S</i> <sub>1</sub> - <i>T</i> <sub>2</sub> ( <i>T</i> <sub>1</sub> ) <sup>g</sup> | <i>T</i> <sub>1</sub> - <i>T</i> <sub>2</sub> ( <i>S</i> <sub>0</sub> ) <sup>h</sup> | <i>T</i> <sub>1</sub> - <i>T</i> <sub>2</sub> ( <i>S</i> <sub>1</sub> ) <sup>i</sup> | <i>T</i> <sub>1</sub> - <i>T</i> <sub>2</sub> ( <i>T</i> <sub>1</sub> ) <sup>j</sup> |
|-------------|------------------------------------|------------------------------------|--------------------------------------------------------------|--------------------------------------------------------------|--------------------------------------------------------------|--------------------------------------------------------------------------------------|--------------------------------------------------------------------------------------|--------------------------------------------------------------------------------------|--------------------------------------------------------------------------------------|--------------------------------------------------------------------------------------|--------------------------------------------------------------------------------------|
| <b>DBTO</b> | 70.0                               | 63.0                               | 80.5                                                         | 79.2                                                         | 76.2                                                         | -10.5                                                                                | -9.2                                                                                 | -6.2                                                                                 | -17.5                                                                                | -16.2                                                                                | -13.2                                                                                |
| <b>1</b>    | 65.0                               | 49.4                               | 73.3                                                         | 72.9                                                         | 68.8                                                         | -8.3                                                                                 | -7.9                                                                                 | -3.8                                                                                 | -23.9                                                                                | -23.5                                                                                | -19.4                                                                                |
| <b>2</b>    | 65.8                               | 52.3                               | 76.0                                                         | 74.5                                                         | 73.0                                                         | -10.2                                                                                | -8.7                                                                                 | -7.2                                                                                 | -23.7                                                                                | -22.2                                                                                | -20.7                                                                                |
| <b>3</b>    | 64.8                               | 48.0                               | 73.4                                                         | 74.8                                                         | 67.9                                                         | -8.6                                                                                 | -10                                                                                  | -3.1                                                                                 | -25.4                                                                                | -26.8                                                                                | -19.9                                                                                |
| <b>4</b>    | 62.3                               | 42.2                               | 66.9                                                         | 68.5                                                         | 60.2                                                         | -4.6                                                                                 | -6.2                                                                                 | 2.1                                                                                  | -24.7                                                                                | -26.3                                                                                | -18                                                                                  |
| <b>5</b>    | 62.7                               | 49.0                               | 59.6                                                         | 68.5                                                         | 57.4                                                         | 3.1                                                                                  | -5.8                                                                                 | 5.3                                                                                  | -10.6                                                                                | -19.5                                                                                | -8.4                                                                                 |

<sup>a</sup> *S*<sub>1</sub> and *T*<sub>1</sub> energies in kcal mol<sup>-1</sup> determined from the difference between the excited and ground (*S*<sub>0</sub>) state energies (H at 0 K) at B3LYP/6-31G(d,p) level of theory. <sup>b</sup> *T*<sub>2</sub> excited state energies at *S*<sub>0</sub> B3LYP/6-31G(d,p) optimized geometry (*E*<sub>el</sub>(*T*<sub>2</sub>)-*E*<sub>el</sub>(*S*<sub>0</sub>)) in kcal mol<sup>-1</sup>. <sup>c</sup> *T*<sub>2</sub> excited state energy at *T*<sub>1</sub> B3LYP/6-31G(d,p) optimized geometry (*E*<sub>el</sub>(*T*<sub>2</sub>)-*E*<sub>el</sub>(*S*<sub>0</sub>)) in kcal mol<sup>-1</sup>. <sup>d</sup> *T*<sub>2</sub> excited state energies at *S*<sub>1</sub> TD-B3LYP/6-31G(d,p) optimized geometry (*E*<sub>el</sub>(*T*<sub>2</sub>)- *E*<sub>el</sub> (*S*<sub>0</sub>)) in kcal mol<sup>-1</sup>. <sup>e</sup> Difference between *S*<sub>1</sub> energy and *T*<sub>2</sub> energy at the *S*<sub>0</sub> geometry in kcal mol<sup>-1</sup>. <sup>f</sup> Difference between *S*<sub>1</sub> energy and *T*<sub>2</sub> energy at the *S*<sub>1</sub> geometry in kcal mol<sup>-1</sup>. <sup>g</sup> Difference between *S*<sub>1</sub> energy and *T*<sub>2</sub> energy at the *T*<sub>1</sub> geometry in kcal mol<sup>-1</sup>. <sup>h</sup> Difference between *T*<sub>1</sub> energy and *T*<sub>2</sub> energy at the *S*<sub>0</sub> geometry in kcal mol<sup>-1</sup>. <sup>i</sup> Difference between *T*<sub>1</sub> energy and *T*<sub>2</sub> energy at the *S*<sub>1</sub> geometry in kcal mol<sup>-1</sup>. <sup>j</sup> Difference between *T*<sub>1</sub> energy and *T*<sub>2</sub> energy at the *T*<sub>1</sub> geometry in kcal mol<sup>-1</sup>.

## Synthesis Methods.

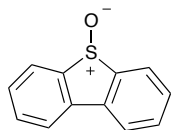

**Preparation of Dibenzothiophene S-oxide (DBTO).** This compound was prepared by slight modification of a previously reported method.<sup>1</sup> A 250 mL round-bottom flask was charged with 1.84g (10mmol) of dibenzothiophene which was then dissolved in 100ml dichloromethane at -30°C. Then 2.48g 77% mCPBA (11.1 mmol) was dissolved in another 100ml dichloromethane and added into the reaction mixture dropwise. The reaction was monitored by TLC. Once completed the reaction mixture was warmed to room temperature, and the reaction mixture was quenched with saturated sodium bicarbonate solution. The organic layer was separated and then the aqueous layer was extracted with CH<sub>2</sub>Cl<sub>2</sub> (3 times), and the combined organic extracts were dried over Na<sub>2</sub>SO<sub>4</sub> and removed under reduced pressure. The crude product was subjected to column chromatography (SiO<sub>2</sub>, dichloromethane as eluent) to yield dibenzothiophene S-oxide (1108mg, 0.504mmol, 55.4% yield). <sup>1</sup>H NMR (400 MHz, CDCl<sub>3</sub>): δ 7.99-7.96 (m, 4H), 7.68 (td, J<sub>1</sub>= 7.7 Hz, J<sub>2</sub>=1.0 H), 7.56 (td, J<sub>1</sub>= 7.6 Hz, J<sub>2</sub>=1.1 H) The spectra of this compound were consistent with literature reports.<sup>1</sup>

**Scheme 1.** Synthesis of Benzo[b]naphtho[1,2-d]thiophene S-oxide (**1**)

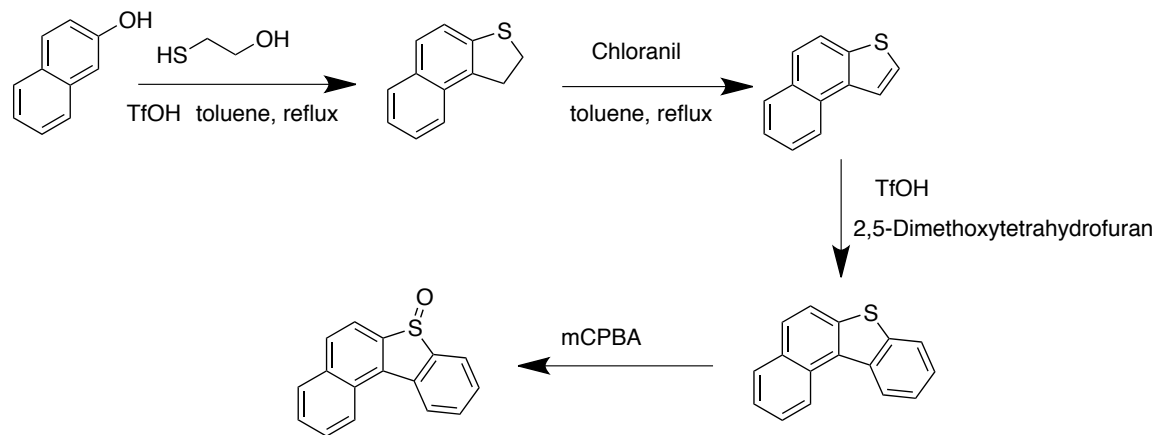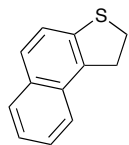

**Preparation of 1,2-dihydro-naphtho[2,1-b]thiophene.** This compound was prepared by slight modification of a previously reported method.<sup>2</sup> 2-naphthol (0.50 g, 3.47 mmol) was dissolved in chlorobenzene (15 ml) and 2-mercaptoethanol (1.46 ml, 20.80 mmol) was added to the solution. Trifluoromethanesulfonic acid (0.77 mL, 8.67 mmol) was added slowly into the reaction mixture at room temperature and the reaction was heated to reflux for 3 hours. Solid started to form in the solution initially, which gradually dissolved during heating. The reaction was cooled to room temperature and quenched with 5% NaOH solution, followed by extraction with CH<sub>2</sub>Cl<sub>2</sub>. The combined organic extract was dried using anhydrous Na<sub>2</sub>SO<sub>4</sub>, filtered and concentrated. The crude product was purified by column chromatography with hexanes as eluent which yielded 1,2-dihydro-naphtho[2,1-b]thiophene (0.34 g, 52%) as pale yellow powder. GCMS (EI) *m/z* 186, 185, 184, 152, 139. This spectrum was consistent with the previous literature.<sup>2</sup>

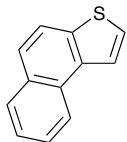

**Preparation of naphtho[2,1-b]thiophene.** This compound was prepared by slight modification of a previously reported method.<sup>2</sup> Tetrachloro-p-benzoquinone (0.74 g, 3.03 mmol) and 1,2-dihydro-naphtho[2,1-b]thiophene (0.28 g, 1.51 mmol) were refluxed in toluene (15 mL) for 24 hours. The reaction was monitored by TLC with hexane as eluent. After the completion of the reaction, the reaction mixture was concentrated under reduced pressure. The crude product was purified by column chromatography with hexane as eluent to afford naphtho[2,1-b]thiophene (0.24 g, 86% yield). <sup>1</sup>H NMR (400 MHz, CDCl<sub>3</sub>): 8.36 (d, J<sub>1</sub>= 8.2 Hz, 1H), 7.91(dd, J<sub>1</sub>= 4.7 Hz, J<sub>2</sub>= 0.6 Hz, 1H), 7.95-7.97 (m, 1H), 7.91 (dd, J<sub>1</sub>= 8.8 Hz, J<sub>2</sub>= 0.64 Hz, 1H), 7.76(d, J=8.8 Hz, 1H), 7.60-7.65(m,2H),7.52-7.57(m,1H). The spectra of this compound are consistent with literature report.<sup>2</sup>

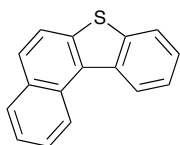

**Preparation of benzo[b]naphtho[1,2-d]thiophene.** This compound was prepared by slight modification of a previously reported method.<sup>3</sup> To a solution of naphtho[2,1-b]thiophene (460mg, 2.5mmol) and 2,5-dimethoxytetrahydrofuran (DMTHF) 4 (0.7.mL 7.7mmol) in dry CH<sub>2</sub>Cl<sub>2</sub> (10 mL) at 0 °C, triflic acid (0.22 mL, 2.5 mmol) was added and allowed to stir for 1hr. After consumption (monitored by TLC), the reaction mass was poured over ice water (20 mL), extracted with DCM (2 x 15 mL) and dried with Na<sub>2</sub>SO<sub>4</sub>. The solvent was then evaporated under reduced pressure and the crude product was purified using column chromatography (silica gel;

hexane) to yield benzo[b] naphtho[1,2-d]thiophene as colorless needles (351 mg, 60% yield). <sup>1</sup>H NMR (400 MHz, CDCl<sub>3</sub>): δ 9.03 (d, J= 8.5 Hz, 1H), 8.88 (d, J= 8.3 Hz, 1H), 8.01- 8.06 (m, 2H), 7.89- 7.95 (m, 2H), 7.74-7.78 (m, 1H), 7.58- 7.64 (m, 2H), 7.50-7.54 (m, 1H). The spectra of this compound are consistent with literature report.<sup>3</sup>

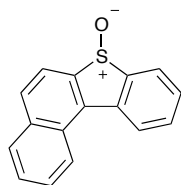

**Preparation of benzo[b]naphtho[1,2-d]thiophene S-oxide (1).** In the reaction flask, 250.0mg (1.06mmol) benzo[b]naphtho[1,2-d]thiophene was dissolved in 100 mL of dichloromethane at -30°C. Then 355mg 77% mCPBA (1.59mmol) was dissolved in another 100 mL dichloromethane and added into the reaction mixture dropwise. After the reaction mixture warmed to room temperature, the reaction mixture was quenched with saturated sodium bicarbonate solution. After the organic layer was collected, the aqueous layer was then extracted with CH<sub>2</sub>Cl<sub>2</sub> (3 times), and the combined organic extracts were dried over Na<sub>2</sub>SO<sub>4</sub> and then evaporated to dryness. The crude product was subjected to column chromatography (SiO<sub>2</sub>, dichloromethane as eluent) to Benzo[b]naphtho[1,2-d]thiophene S-oxide (83.3mg, 0.331mmol, 31.2% yield). <sup>1</sup>H NMR (400 MHz, CDCl<sub>3</sub>): δ 8.16 (d, J=8.4 Hz, 1H), 8.47 (d, J= 7.9 Hz, 1H) 7.98-8.09 (m, 4H), 7.63-7.74 (m, 3H), 7.52- 7.56 (m, 1H). <sup>13</sup>C NMR (400 MHz, CDCl<sub>3</sub>): δ 145.97, 144.09, 138.07, 136.06, 132.58, 132.55, 130.74, 129.77, 129.55, 128.94, 128.66, 128.24, 127.80, 125.39, 124.45, 122.45. HRMS m/z calcd for C<sub>16</sub>H<sub>10</sub>OS(Na) 273.035 found 273.035.

**Scheme 2.** Synthesis of benzo[b]naphtho[2,1-d]thiophene S-oxide (2)

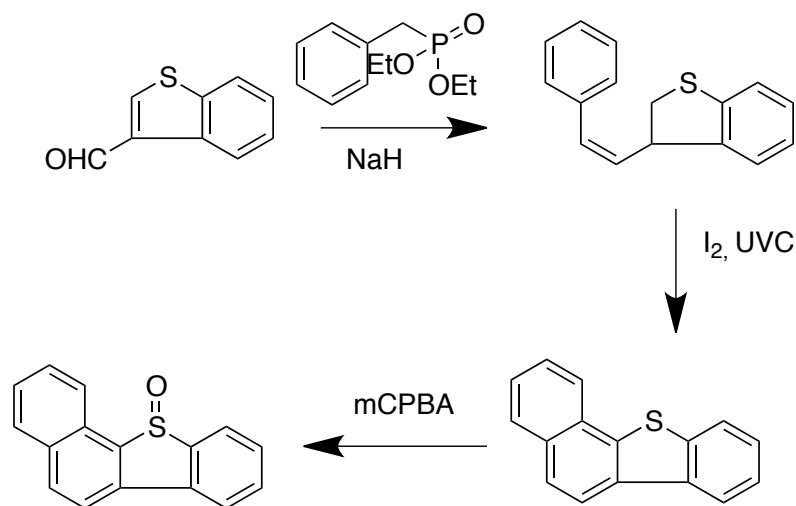

**Preparation of 3-styrylbenzo[b]thiophene.** This compound was prepared by slight modification of a previously reported method. Sodium hydride (1.3 g, 54.18 mmol) was added to a mixture of 3-carbaldehydebenzo[b]thiophene (4.27 g, 26.3 mmol), diethyl benzylphosphonate (5.76 g, 25.2 mmol) in 50 mL of 1,2-dimethoxyethane at 0° C and stirred for 15 minutes at 0° C. The solution is gradually warmed to room temperature and stirred for 3 hr. The reaction mixture was poured into water ice and filtered. The filtered solid was recrystallized using ethanol to yield yellow solid of 3-styrylbenzo[b]thiophene (4.5 g, 76%). GCMS (EI) *m/z* 236, 235, 234, 221, 202. The spectra of this compound are consistent with literature report.<sup>4</sup>

**Preparation of benzo[b]naphtho[2,1-d]thiophene.** This compound was prepared by slight modification of a previously reported method.<sup>4</sup> In a 500 mL quartz flask, 3-styrylbenzo[b]thiophene (1.38 g, 5.8 mmol) and iodine (0.013 g, 0.3 mmol) were dissolved in toluene (500 mL). The solution was stirred and irradiated with UVC light (12 Luzchem 8 watts UVC light bulbs) overnight. The crude product was concentrated and recrystallized using hexane



which yielded benzo[b]naphtho[2,1-d]thiophene (920.0 mg, 67%). <sup>1</sup>H NMR (400 MHz, CDCl<sub>3</sub>): δ 8.22- 8.24 (m, 1H), 8.19 (d, J= 8.6 Hz, 1H), 8.16 (d, J= 8.0 Hz, 1H), 7.97- 8.01 (m, 2H), 7.88 (d, J=8.6 Hz, 1H), 7.56-7.66 (m, 2H), 7.48-7.55 (m, 2H) The spectra of this compound are consistent with literature report.<sup>4</sup>

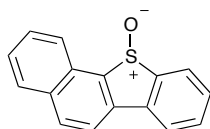

**Preparation of benzo[b]naphtho[2,1-d]thiophene S-oxide (2).** Benzo[b]naphtho[2,1-d]thiophene (250.0 mg, 1.06 mmol) was dissolved in 100 mL dichloromethane at -30°C. To this solution, 355mg of 77%-pure mCPBA (1.59mmol) was dissolved in another 100 mL dichloromethane and added dropwise. After the reaction mixture warm up to room temperature, the reaction mixture was quenched with saturated sodium bicarbonate solution. After the organic layer was separated, the aqueous layer was then extracted with CH<sub>2</sub>Cl<sub>2</sub> (3 times), and the combined organic extracts were dried over Na<sub>2</sub>SO<sub>4</sub> and then concentrated. The crude product was subjected to column chromatography (SiO<sub>2</sub>, dichloromethane as eluent) to benzo[b]naphtho[1,2-d]thiophene S-oxide (126.1mg, 0.504mmol, 47.2% yield). <sup>1</sup>H NMR (400 MHz, CDCl<sub>3</sub>): δ 8.54 (d, J= 8.3 Hz, 1H ), 8.08 (dd, J<sub>1</sub>= 8.4 Hz, J<sub>2</sub>= 7.2 Hz, J<sub>3</sub>= 3.6 Hz, 2H), 7.95 (d, J=8.2 Hz, 1H), 7.88 (dd, J<sub>1</sub>= 5.5, J<sub>2</sub>= 4.7 Hz, J<sub>3</sub>= 2.9 Hz, 2H), 7.68-7.72 (m, 1H), 7.58-7.65 (m, 2H), 7.53 (td, J<sub>1</sub>= 7.6 Hz, J<sub>2</sub>=1.1 Hz, 1H). The spectrum of this compound was consistent with reported literature.<sup>5</sup>

**Scheme 3.** Synthesis of benzo[b]phenanthro[9,10-d]thiophene S-oxide(3)

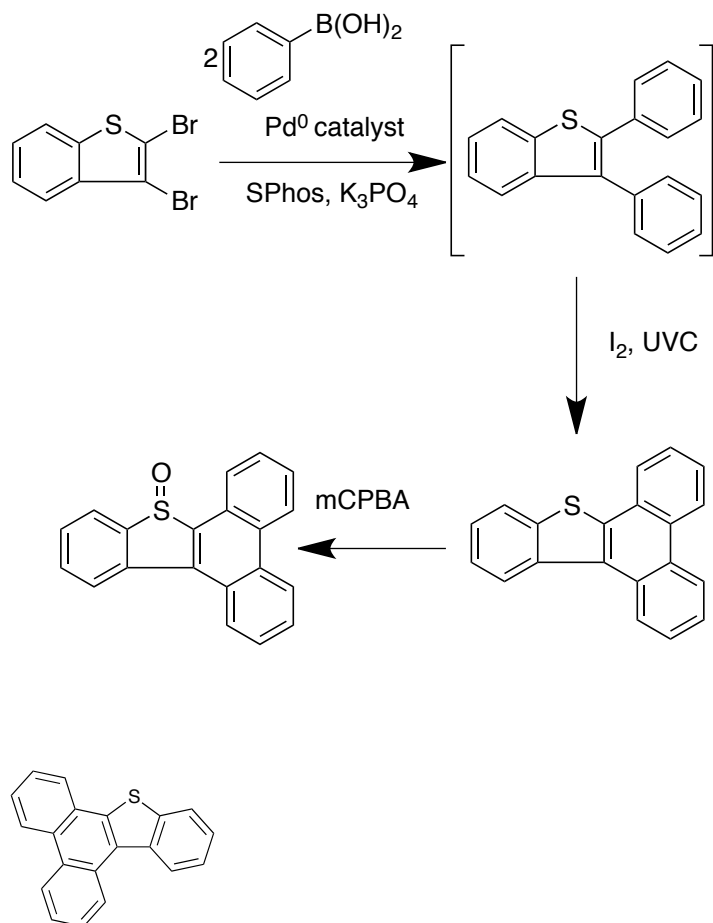

**Preparation of benzo[b]phenanthro[9,10-d]thiophene.** This compound was prepared by slight modification of a previously reported method.<sup>6</sup> 2,3-dibromobenzo[b]thiophene (3.054g, 10.45mmol), phenyl boronic acid (3.12 g, 25.69mmol), SPhos (197.7mg, 0.478mmol), Tetrakis(triphenylphosphine)palladium(0) (150mg, 0.130mmol) and  $\text{K}_3\text{PO}_4$  (7.4 g , 32.21mmol ) were dissolved in toluene (100.0 ml) and water (5.0 ml) in a 250 ml 3-neck round bottle flask. The mixture was degassed with Argon for 20 min and refluxed for 5 hours. Upon completion, the reaction mixture was cooled to room temperature and washed with water. The product was extracted from aqueous layer with toluene (20.0 ml) twice. The organic layer was dried with anhydrous  $\text{MgSO}_4$ . The dried organic layer was diluted to 400 ml of toluene and added to a 500 ml quartz flask. Iodine (800.0 mg, 6.30 mmoles) was added to the quartz flask and the solution

was irradiated with UV-C light (12 Luzchem 8 watts UVC light bulbs) overnight. Upon completion of the reaction, the excess iodine was quenched with saturated sodium bisulfate solution (50mL). The organic layer was separated and dried with anhydrous  $\text{MgSO}_4$  and the aqueous layer was washed twice with dichloromethane. The combined organic layer was concentrated under reduced pressure. The crude product was recrystallized in hexanes which afforded white crystals of pure of Benzo[b]phenanthro[9,10-d]thiophene (1.324g, 45.21%).  $^1\text{H}$  NMR (400 MHz,  $\text{CDCl}_3$ ):  $\delta$  9.02 (dd,  $J_1 = 7.1$  Hz,  $J_2 = 1.1$  Hz, 1H), 8.78- 8.83 (m, 2H), 8.70- 8.72(m, 1H), 8.17-8.19 (m, 1H), 8.03 (dq,  $J_1 = 7.9$  Hz,  $J_2 = 0.6$  Hz, 1H), 7.75-7.79 (m, 1H), 7.65- 7.71 (m, 3H), 7.57-7.61 (m, 1H), 7.48-7.52 (m, 1H). The spectra of this compound are consistent with literature report.<sup>6</sup>

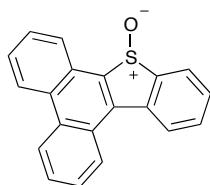

**Preparation of benzo[b]phenanthro[9,10-d]thiophene S-oxide (3).** The title compound was prepared by dissolving 517.3mg (1.82mmol) of benzo[b]phenanthro[9,10-d]thiophene in 100 mL dichloromethane at  $-30$  °C. Then 600 mg of 77% mCPBA (2.68mmol) was dissolved in another 100 mL dichloromethane and added into the reaction mixture dropwise. After the reaction mixture was warmed to room temperature, the reaction mixture was quenched with saturated sodium bicarbonate solution. After the organic layer was separated, the aqueous layer was then extracted with  $\text{CH}_2\text{Cl}_2$  (3 times), and the combined organic extracts were dried over  $\text{Na}_2\text{SO}_4$  and then concentrated. The crude product was subjected to column chromatography ( $\text{SiO}_2$ , dichloromethane as eluent) to yield benzo[b]phenanthro[9,10-d]thiophene S-oxide (160.0 mg,

0.533mmol, 29.3% yield).  $^1\text{H}$  NMR (400 MHz,  $\text{CDCl}_3$ ):  $\delta$  8.81- 8.89 (m, 2H), 8.68- 8.75 (m, 2H), 8.51 (d,  $J$  = 7.9 Hz, 1H), 8.14 (dd,  $J_1$  = 7.2 Hz,  $J_2$  = 0.8 Hz, 1H), 7.75-7.82(m, 4H), 7.71 (td,  $J_1$  = 7.5 Hz  $J_2$  = 1.3 Hz, 1H), 7.58 (td,  $J_1$  = 7.5 Hz,  $J_2$  = 0.9 Hz, 1H).  $^{13}\text{C}$  NMR (400 MHz,  $\text{CDCl}_3$ ):  $\delta$  145.41, 141.72, 138.03, 133.13, 132.39, 132.26, 130.76, 128.71, 128.53, 128.32, 128.29, 127.91, 127.73, 127.59, 125.49, 125.15, 124.08, 123.33. HRMS  $m/z$  calcd for  $\text{C}_{20}\text{H}_{12}\text{OS}(\text{Na})$  323.051 found 323.051.

**Scheme 4.** Synthesis of dinaphtho[2,1-b:1',2'-d]thiophene *S*-oxide (**4**)

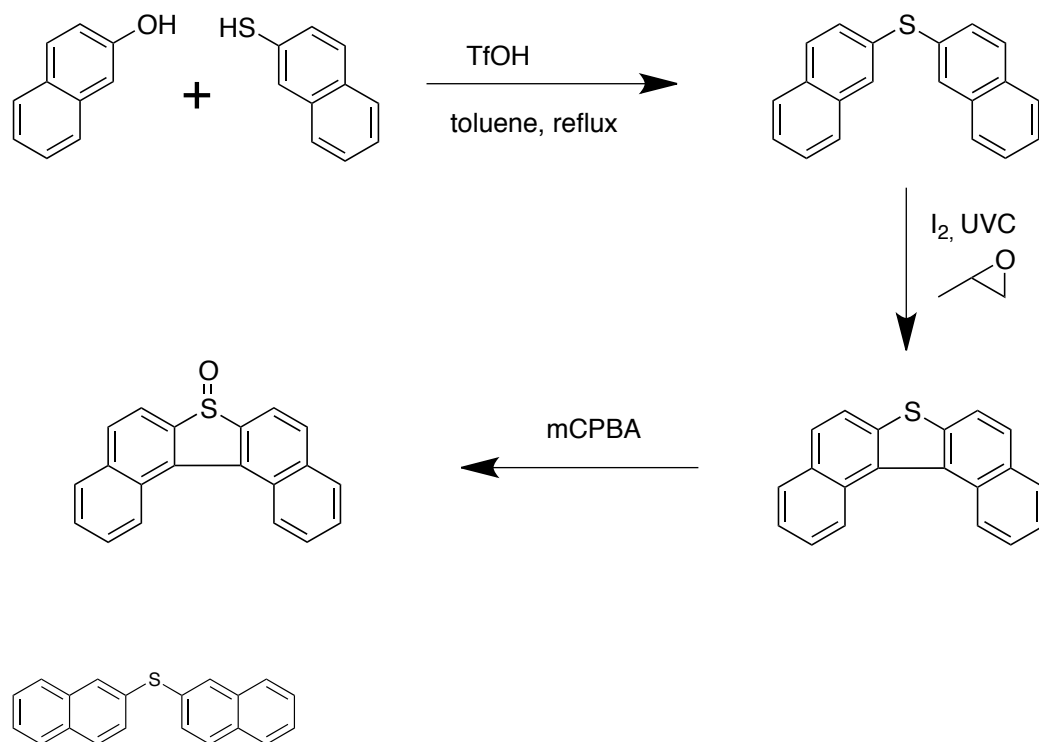

**Preparation of 2,2'-thiobis-naphthalene.** This compound was prepared by slight modification of a previously reported method.<sup>7</sup> A solution of 2-naphthol (1663.8 mg, 11.59 mmol) and 2-naphthalenethiol (1396.4 mg, 8.73 mmol) in the presence of trifluoromethanesulfonic acid (0.5ml, 5.64 mmol) was refluxed in toluene for 4 h. After the reaction was cooled, the reaction was quenched with saturated NaOH solution. The mixture was then extracted with CH<sub>2</sub>Cl<sub>2</sub> (3 times), and the combined organic extracts were washed with H<sub>2</sub>O, dried over Na<sub>2</sub>SO<sub>4</sub> and then evaporated to dryness. The crude product was stirred in hot hexane (150 mL) and toluene (20 mL) until the solid was dissolved. The hot solution was placed into the freezer at -30 °C overnight to allow crystal formation. This resulted in 2054.8mg (7.18mmol) of a white powder, which was obtained through vacuum filtration (82.3% yield). GCMS (EI) *m/z* 286, 252. The spectra of this compound are consistent with literature report.<sup>7</sup>

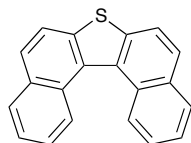

**Preparation of dinaphtho[2,1-b:1',2'-d]thiophene.** This compound was prepared by slight modification of a previously reported method.<sup>7</sup> A solution of 2,2'-thiobis-naphthalene (300 mg, 1.05 mmol), I<sub>2</sub> (320 mg, 1.26 mmol) and propylene oxide (366 mg, 0.44 mL, 6.30 mmol in 500 mL dichloromethane was charged in a 500 mL quartz flask. The mixture was irradiated with UVC light (12 Luzchem 8 watts UVC light bulbs) overnight. Upon completion, the solution was evaporated to dryness, and the crude product was subjected to column chromatography (SiO<sub>2</sub>, hexane as eluent) to yield dinaphtho[2,1-b:1',2'-d]thiophene (228 mg, 85% yield). <sup>1</sup>H NMR (400 MHz, CDCl<sub>3</sub>): δ 8.88- 8.90 (m, 2H), 8.04-8.06 (m, 2H), 7.93-7.99 (m, 4H), 7.58- 7.60 (m, 4H). The spectra of this compound are consistent with literature report.<sup>7</sup>

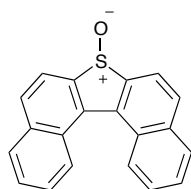

**Preparation of dinaphtho[2,1-b:1',2'-d]thiophene *S*-oxide (4).** A solution containing 120.0mg (0.42mmol) of dinaphtho[2,1-b:1',2'-d]thiophene in 100 mL dichloromethane at -30°C was prepared. Then 127mg 77% mCPBA (0.56mmol) was dissolved in another 100 mL dichloromethane and added into the reaction mixture dropwise. After the reaction mixture was warmed to room temperature, the reaction mixture was quenched with saturated sodium bicarbonate solution. After the organic layer was separated, the aqueous layer was then extracted with CH<sub>2</sub>Cl<sub>2</sub> (3 times), and the combined organic extracts were dried over Na<sub>2</sub>SO<sub>4</sub> and then evaporated to dryness. The crude product was subjected to column chromatography (SiO<sub>2</sub>, dichloromethane as eluent) to yield dinaphtho[2,1-b:1',2'-d]thiophene *S*-oxide (31.2 mg, 0.110mmol, 26.1% yield). <sup>1</sup>H NMR (400 MHz, CDCl<sub>3</sub>): δ 8.44 (d, J= 8.4 Hz, 2H), 8.09-8.15(m, 2H), 8.03 (d, J= 8.7 Hz, 2H), 7.60- 7.69 (m, 4H). <sup>13</sup>C NMR (400 MHz, DMSO): δ 144.51, 136.90, 135.19, 130.93, 129.30, 129.26, 128.27, 127.96, 126.64, 122.70. C<sub>20</sub>H<sub>12</sub>OS(Na) 323.051 found 323.050.

**Scheme 5.** Synthesis of Dinaphtho[1,2-b:2',1'-d]thiophene S-oxide (**5**)

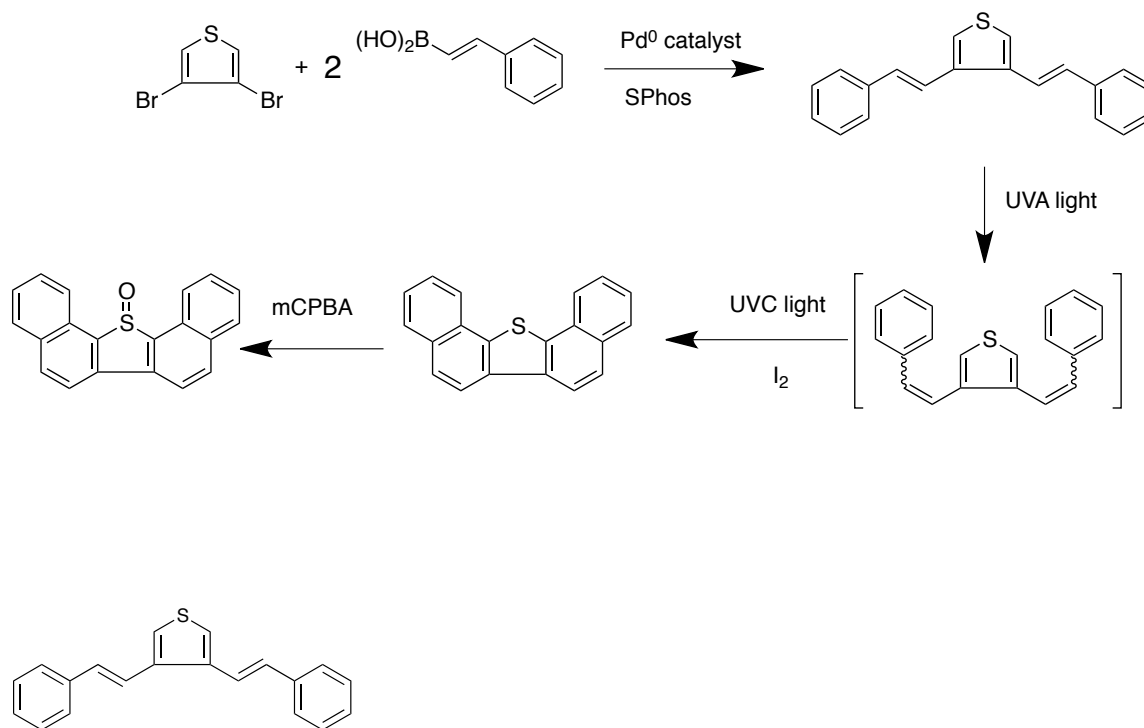

**Preparation of 3,4-Distyrylthiophene.** 3,4-dibromothiophene (1300.0 mg, 5.37 mmol), *trans*-2-Phenylvinylboronic acid (2000.0 mg, 13.52 mmol), 2-Dicyclohexylphosphino-2',6'-dimethoxybiphenyl (88.0 mg, 0.21 mmol), K<sub>3</sub>PO<sub>4</sub> (3439 mg, 16.20 mmol) were dissolved in a solvent mixture of toluene (100.0 ml), water (5.0 mL) and methanol (15.0 mL). Argon gas was purged through the solution for 30 min. Pd<sub>2</sub>(dba)<sub>3</sub> (124.4 mg, 0.14 mmol) was then added the solution. The reaction mixture was refluxed overnight at 78<sup>0</sup>C temperature. The crude product was purified using flash chromatography using hexanes as the eluent. This afforded pure 3,4-distyrylthiophene (1098.5 mg, 71.0%) as a white solid. <sup>1</sup>H NMR (400 MHz, DMSO): δ 7.82 (s,2H), 7.67 (d, J=7.6 Hz, 4H), 7.45 (d, J=16.2, 2H), 7.39 (dd, J<sub>1</sub>= 7.44 Hz, J<sub>2</sub>= 7.4 Hz, 2H), 7.28 (dd, J<sub>1</sub>=7.12, J<sub>2</sub>=6.96, 2H), 7.13 (d, J=16.2, 2H). <sup>13</sup>C NMR (400 MHz, DMSO): δ 138.07,

137.09, 130.02, 128.56, 127.49, 126.49, 121.33, 121.08. HRMS  $m/z$  calcd for  $C_{20}H_{16}S$  288.097 found 288.097.

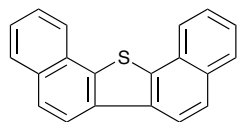

**Preparation of Dinaphtho[1,2-*b*:2',1'-*d*]thiophene.** (300.0 mg, 1.04 mmol) was dissolved in a mixture of hexanes (400.0 ml) and dichloromethane (20.0 ml) in a 500 ml quartz flask. Propylene oxide (1.0 ml, 14.29 mmol) was added to the solution and Argon gas was purged through the solution for 30 min. The solution was irradiated with UV-A light for 2 hours. The color of the solution changed to yellow from colorless. Iodine (150.0 mg, 0.59 mmol) was dissolved in dichloromethane (10.0 ml) and added to the solution. The solution was then irradiated with UV-C light for 2 hours. This afforded dinaphtho[1,2-*b*:2',1'-*d*]thiophene. (21.3mg, 7.2%) as a white solid.  $^1H$  NMR (400 MHz,  $CDCl_3$ ):  $\delta$  8.27 (d,  $J$ = 8.6 Hz, 2H), 8.25 (d,  $J$ =8.8 Hz, 2H), 8.02 (d,  $J$ = 8.0 Hz, 2H), 7.93 (d,  $J$ = 8.6 Hz, 2H), 7.67 (dd,  $J_1$ = 7.7 Hz,  $J_2$ = 7.3 Hz, 2H), 7.59 (dd,  $J_1$ = 7.9 Hz,  $J_2$ = 7.04 Hz, 2H).  $^{13}C$  NMR (400 MHz,  $CDCl_3$ ):  $\delta$  136.98, 134.03, 132.34, 129.35, 129.21, 127.08, 126.37, 125.91, 124.52, 120.01. HRMS  $m/z$  calcd for  $C_{20}H_{12}S$  284.066 found 284.066.

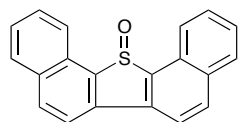

**Preparation dinaphtho[1,2-*b*:2',1'-*d*]thiophene *S*-oxide (5).** Dinaphtho[1,2-*b*:2',1'-*d*]thiophene (20.0 mg, 0.07 mmol) was dissolved in dichloromethane (20.0 ml) at 0°C. To this solution, 77% mCPBA(19.0 mg, 0.08 mmol) was dissolved in dichloromethane (3.0 mL) and was added



dropwise the solution containing dinaphtho[1,2-*b*:2',1'-*d*]thiophene. The reaction was monitored using TLC with CH<sub>2</sub>Cl<sub>2</sub> as eluent. The reaction mixture was stirred for 4 hours and the excess mCPBA was quenched with saturated sodium bicarbonate solution. The product was extracted with CH<sub>2</sub>Cl<sub>2</sub> and the organic layer was dried using anhydrous Na<sub>2</sub>SO<sub>4</sub>. The dried organic layer was concentrated under reduced pressure the crude product was purified using column chromatography with CH<sub>2</sub>Cl<sub>2</sub> as eluent. This afforded pure Dinaphtho[1,2-*b*:2',1'-*d*]thiophene *S*-oxide (7.8 mg, 38.1%). <sup>1</sup>H NMR (400 MHz, CDCl<sub>3</sub>): δ 8.61 (d, J=8.4 Hz, 2H), 8.12 (d, J=8.4 Hz, 2H), 7.97 (d, J=8.5 Hz, 4H), 7.73 (t, J=7.6 Hz, 2H), 7.61 (t, J=7.6 Hz, 2H). <sup>13</sup>C NMR (400 MHz, CDCl<sub>3</sub>): δ 140.77, 135.98, 134.18, 133.81, 130.96, 129.29, 129.11, 127.47, 124.13, 119.19. HRMS m/z calcd for C<sub>20</sub>H<sub>12</sub>OS 300.061 found 300.061.

### Supporting Spectra benzo[*b*]naphtho[1,2-*d*]thiophene *S*-oxide (1)

<sup>1</sup>H-NMR of compound 1 in CDCl<sub>3</sub>

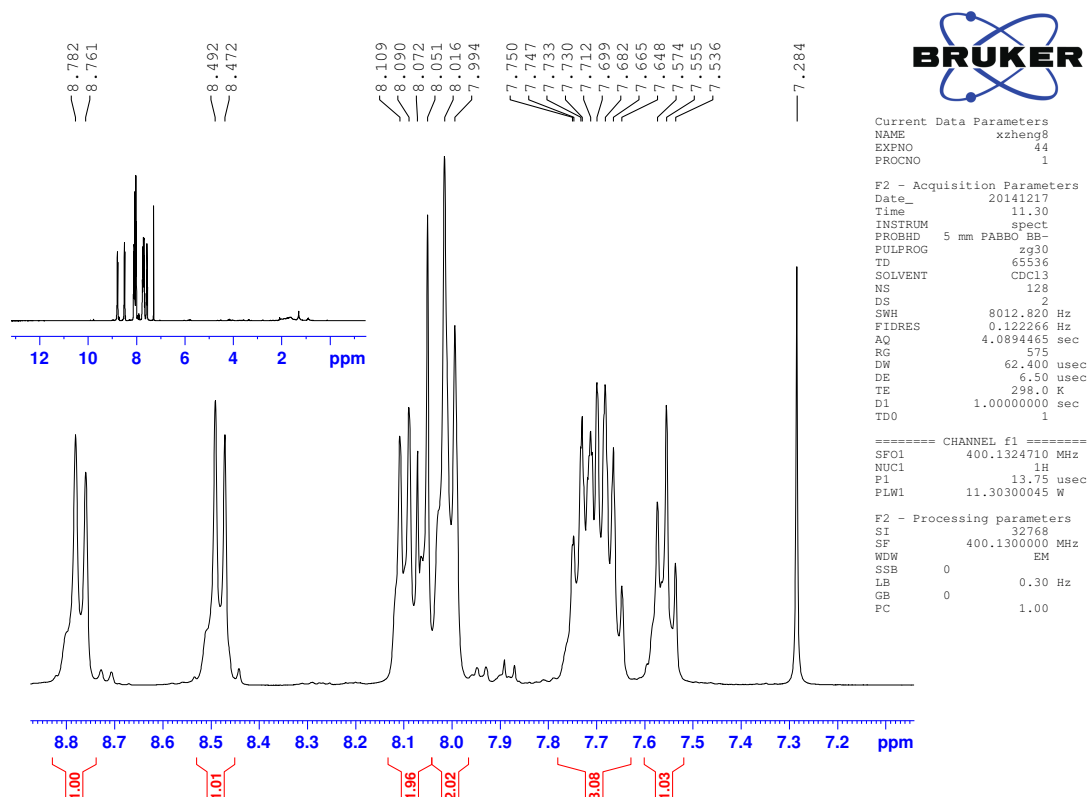

C13 NMR of Compound **1** in CDCl<sub>3</sub>

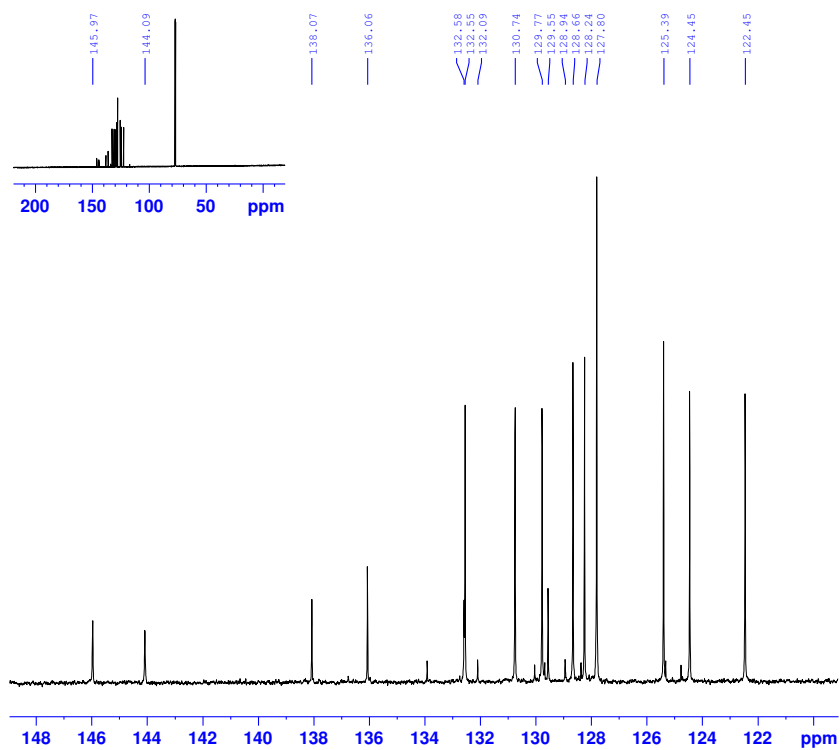

**BRUKER**

Current Data Parameters  
 NAME xzheng8  
 EXPNO 45  
 PROCNO 1

F2 - Acquisition Parameters  
 Date\_ 20141218  
 Time 2.49  
 INSTRUM spect  
 PROBHD 5 mm PABBO BB-  
 PULPROG zgpg30  
 TD 65536  
 SOLVENT CDCl3  
 NS 10240  
 DS 4  
 SWH 24038.461 Hz  
 FIDRES 0.366798 Hz  
 AQ 1.3631488 sec  
 RG 1150  
 DW 20.800 usec  
 DE 6.50 usec  
 TE 298.0 K  
 D1 2.0000000 sec  
 D11 0.0300000 sec  
 TD0 1

==== CHANNEL f1 =====  
 SFO1 100.6228293 MHz  
 NUC1 13C  
 P1 8.50 usec  
 PLW1 61.42300034 W

==== CHANNEL f2 =====  
 SFO2 400.1316005 MHz  
 NUC2 1H  
 CPMRG[2] waltz16  
 PCPD2 90.00 usec  
 PLW2 11.30300045 W  
 PLW12 0.27351999 W  
 PLW13 0.22155000 W

F2 - Processing parameters  
 SI 32768  
 SF 100.6127690 MHz  
 WDW EM  
 SSB 0  
 LB 1.00 Hz  
 GB 0  
 PC 1.40

HRMS of compound 1 with NaI as cosolute

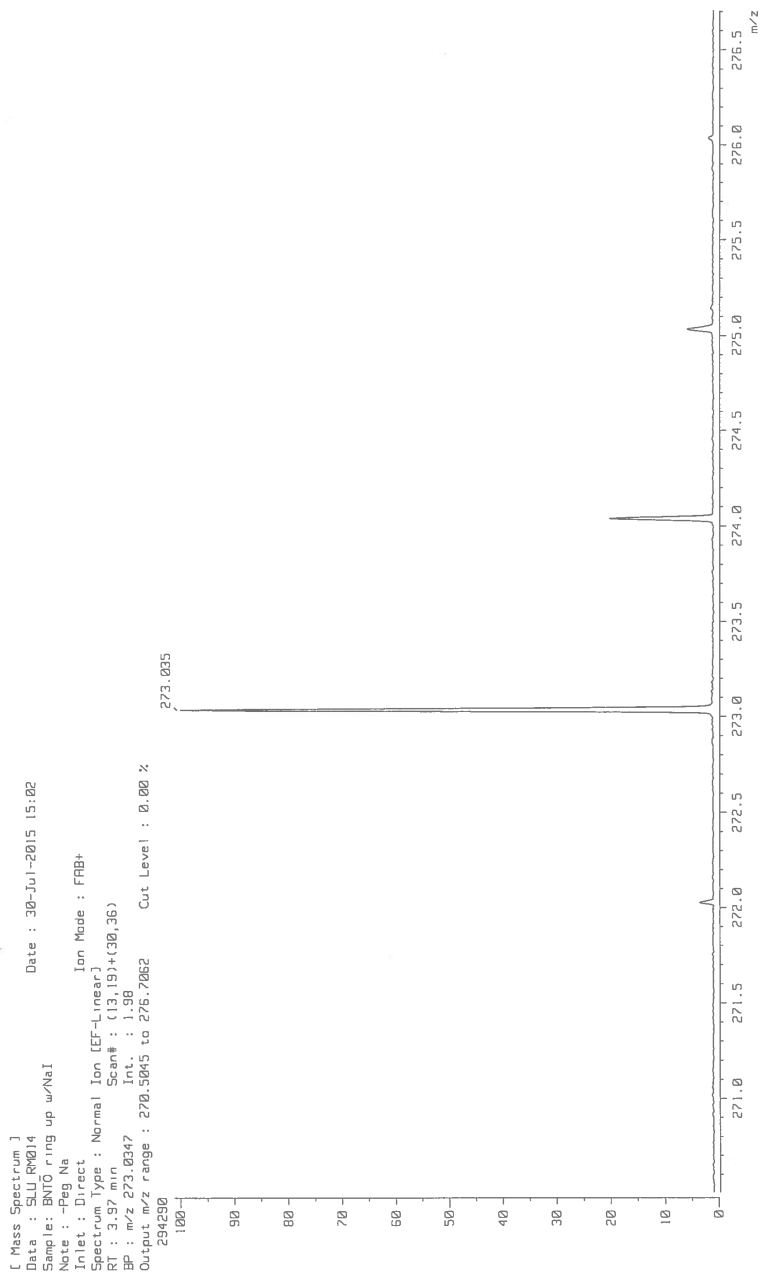

HPLC trace of compound 1.

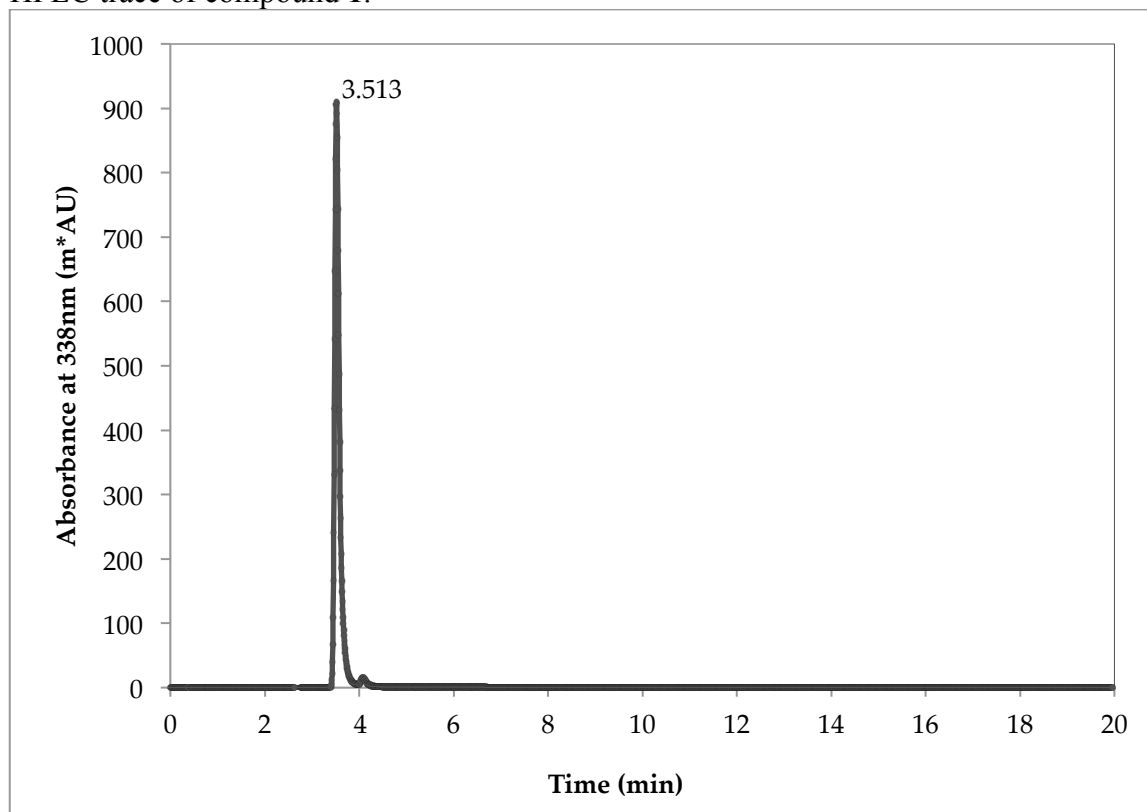

# benzo[b]phenanthro[9,10-d]thiophene S-oxide (3)

<sup>1</sup>H-NMR of compound 3 in CDCl<sub>3</sub>

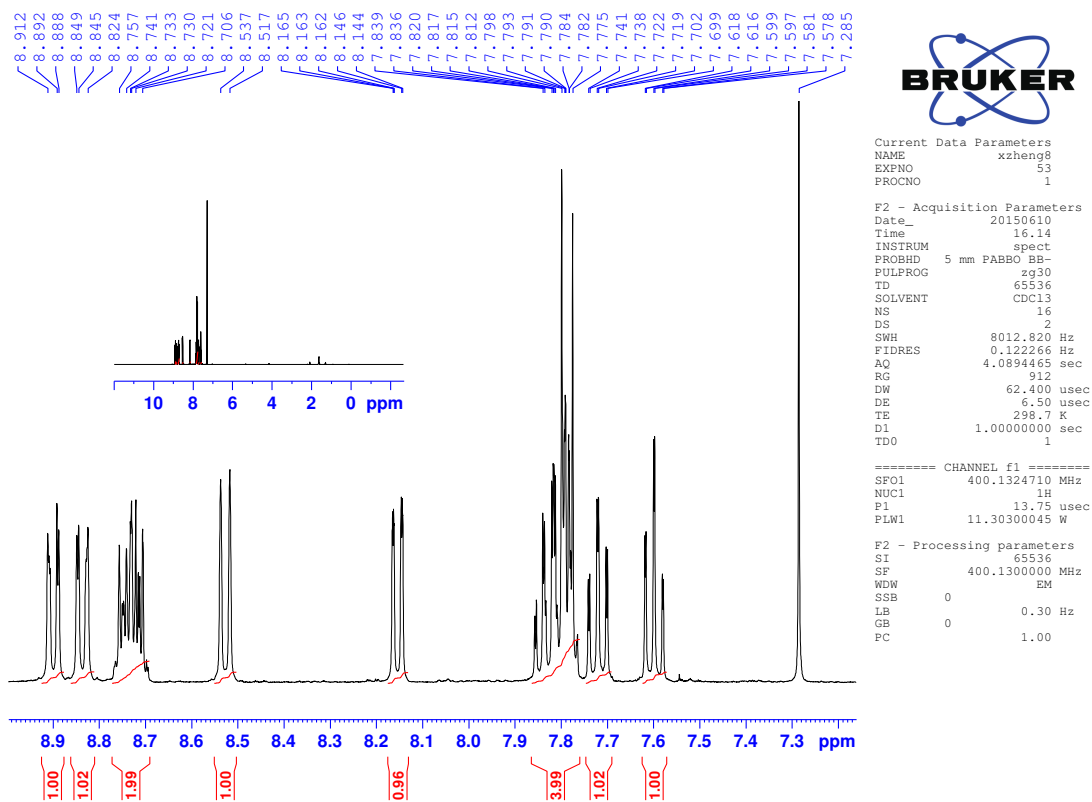

# <sup>13</sup>C-NMR of compound **3** in CDCl<sub>3</sub>

BPTO C13 NMR

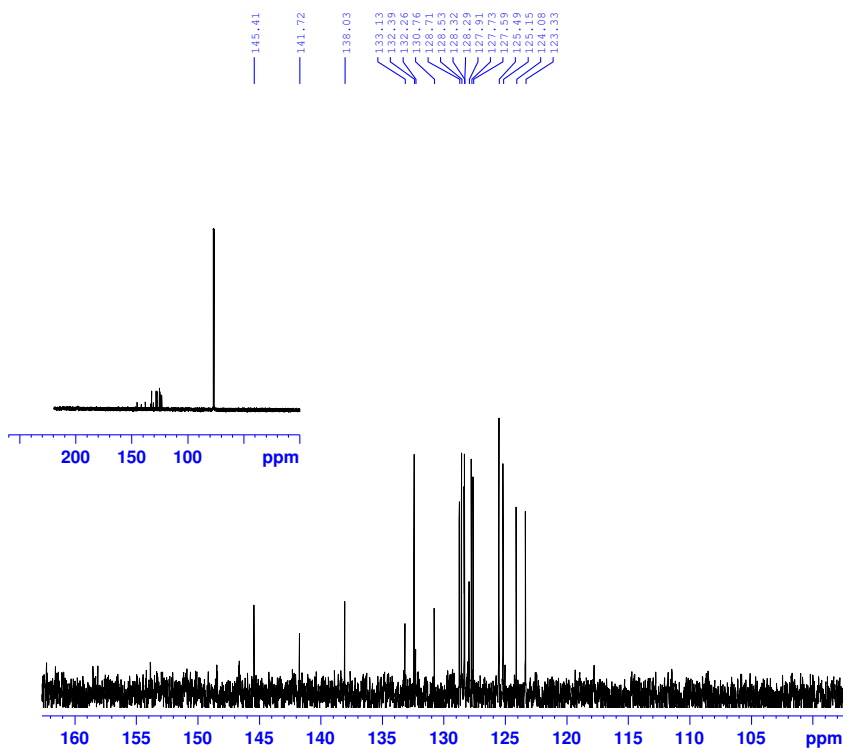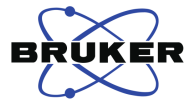

Current Data Parameters  
NAME xzheng8  
EXPNO 56  
PROCNO 1

F2 - Acquisition Parameters  
Date\_ 20150611  
Time 5.19  
INSTRUM spect  
PROBHD 5 mm PABBO BB-  
PULPROG zgpg30  
TD 65536  
SOLVENT CDCl3  
NS 12000  
DS 4  
SWH 24038.461 Hz  
FIDRES 0.366798 Hz  
AQ 1.3631488 sec  
RG 203  
DW 20.800 usec  
DE 6.50 usec  
TE 299.3 K  
D1 2.0000000 sec  
D11 0.0300000 sec  
TD0 1

===== CHANNEL f1 =====  
SFO1 100.6228293 MHz  
NUC1 13C  
P1 8.50 usec  
PLW1 61.42300034 W

===== CHANNEL f2 =====  
SFO2 400.1316005 MHz  
NUC2 1H  
PCPDG[2] waltz16  
PCPD2 90.00 usec  
PLW2 11.30300045 W  
PLW12 0.27351999 W  
PLW13 0.22155000 W

F2 - Processing parameters  
SI 32768  
SF 100.6127690 MHz  
WDW EM  
SSB 0  
LB 1.00 Hz  
GB 0  
PC 1.40

HRMS of compound **3** with NaI as cosolute

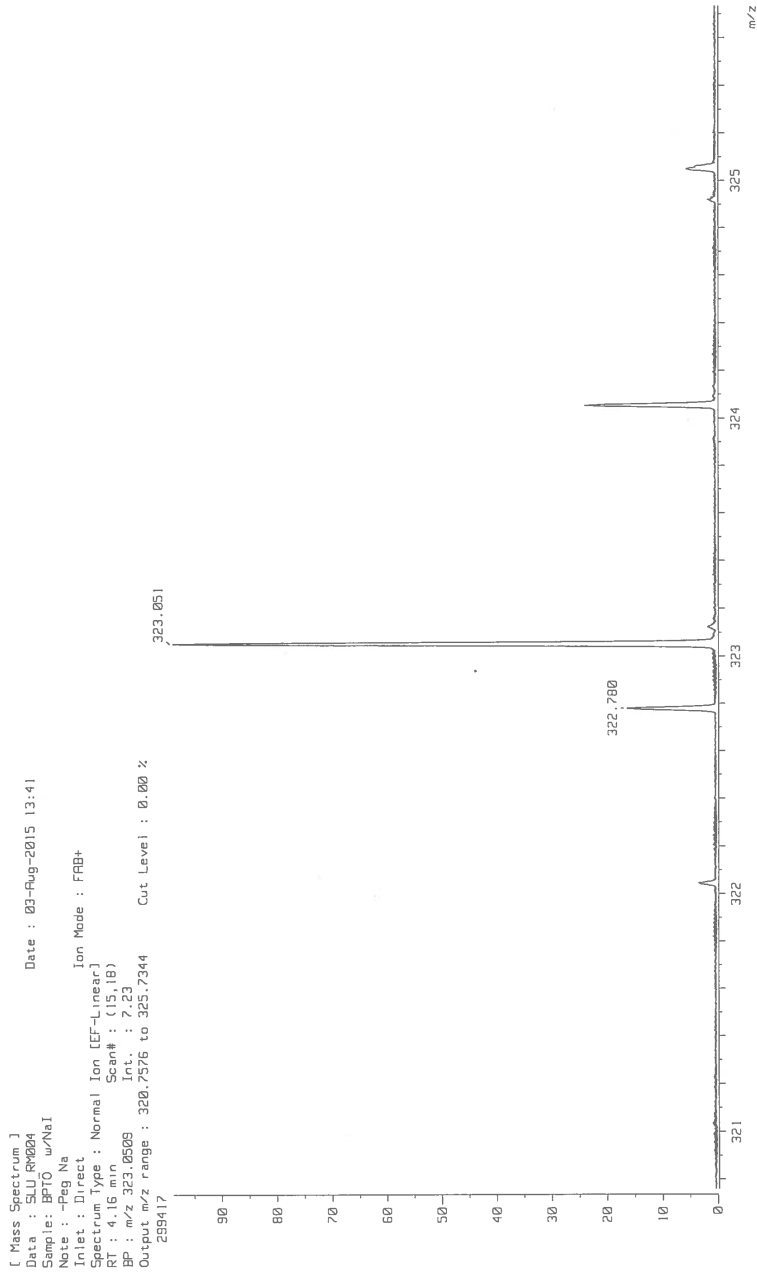

HPLC trace compound 3

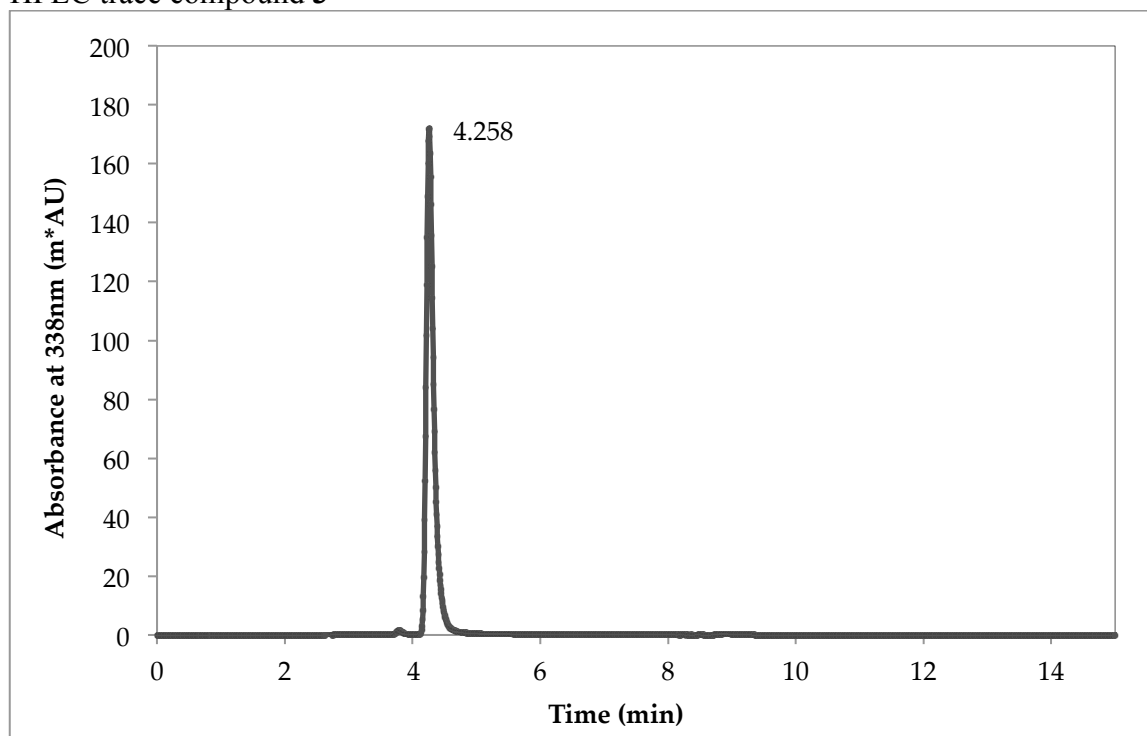



# dinaphtho[2,1-*b*:2',1'-*d*]thiophene *S*-oxide (4).

<sup>1</sup>H-NMR of Compound 4 in CDCl<sub>3</sub>

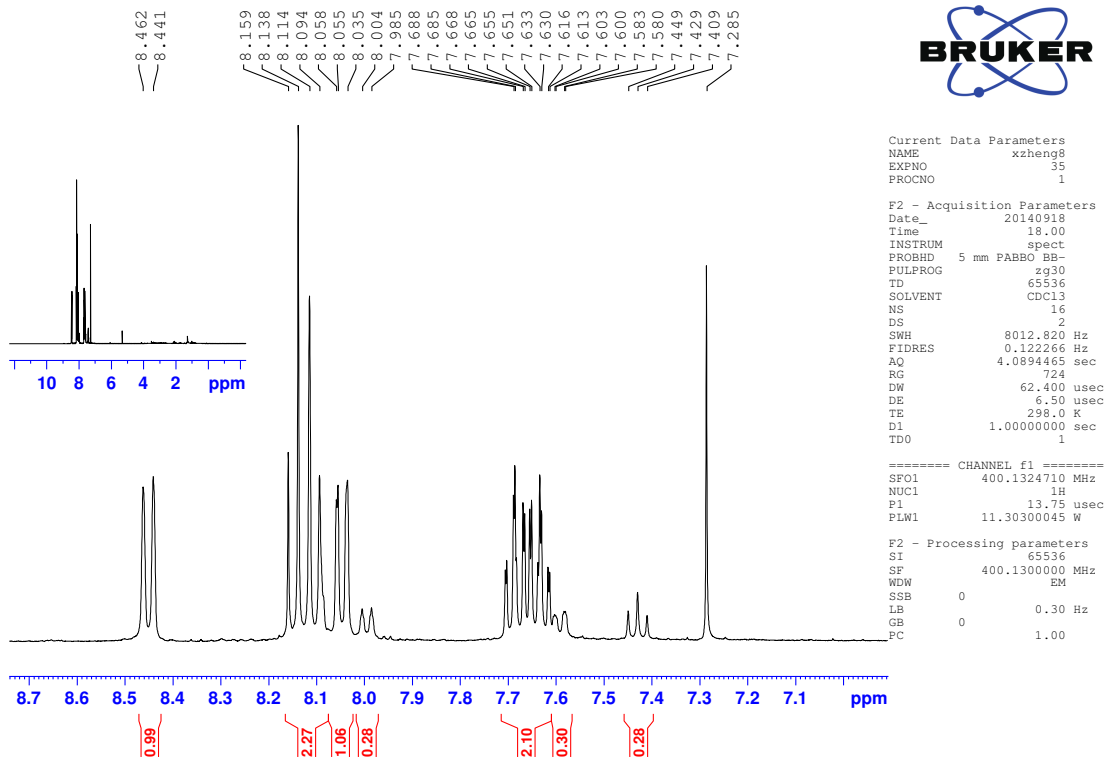

<sup>13</sup>C-NMR of Compound 4 in CDCl<sub>3</sub>

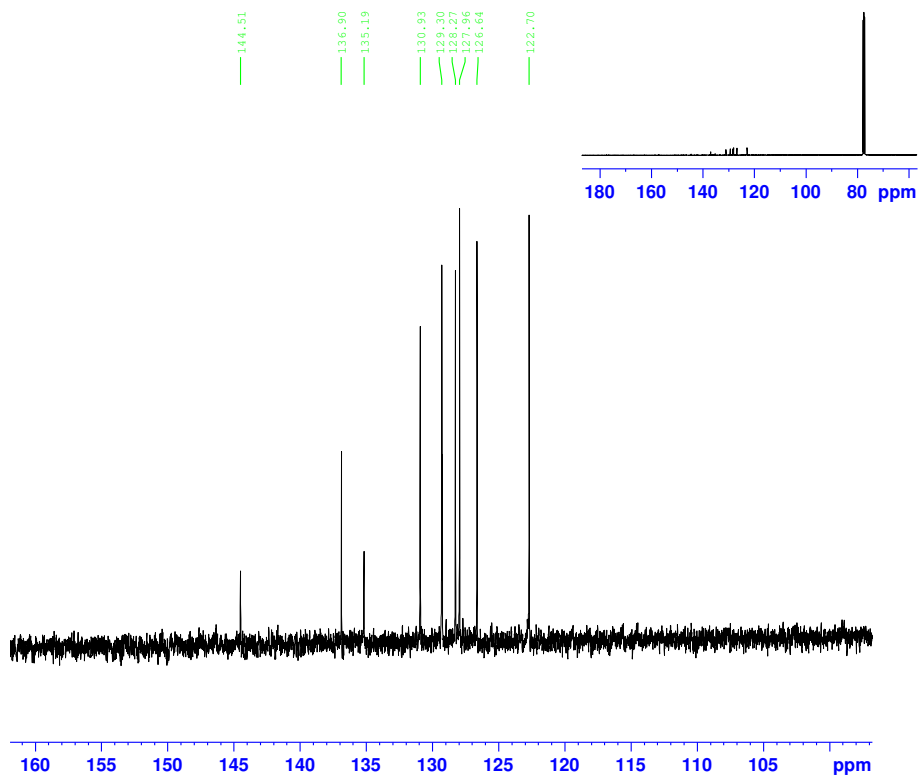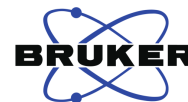

Current Data Parameters  
NAME xzheng8  
EXPNO 22  
PROCNO 22

F2 - Acquisition Parameters  
Date\_ 20140513  
Time 17.09  
INSTRUM spect  
PROBHD 5 mm PABBO BB-  
PULPROG zgpg30  
TD 65536  
SOLVENT CDCl3  
NS 14000  
DS 4  
SWH 24038.461 Hz  
FIDRES 0.366798 Hz  
AQ 1.3631488 sec  
RG 812  
DW 20.800 usec  
DE 6.50 usec  
TE 298.2 K  
D1 2.00000000 sec  
D11 0.03000000 sec  
TD0 1

===== CHANNEL f1 =====  
SFO1 100.6228298 MHz  
NUC1 13C  
P1 8.50 usec  
PLW1 61.42300034 W

===== CHANNEL f2 =====  
SFO2 400.1316005 MHz  
NUC2 1H  
CPDPRG2 waltz16  
PCPD2 90.00 usec  
PLW2 11.30300045 W  
PLW12 0.27351999 W  
PLW13 0.22155000 W

F2 - Processing parameters  
SI 32768  
SF 100.6127378 MHz  
WDW EM  
SSB 0  
LB 1.00 Hz  
GB 0  
PC 1.40

# HRMS of compound 4 with NaI as cosolute

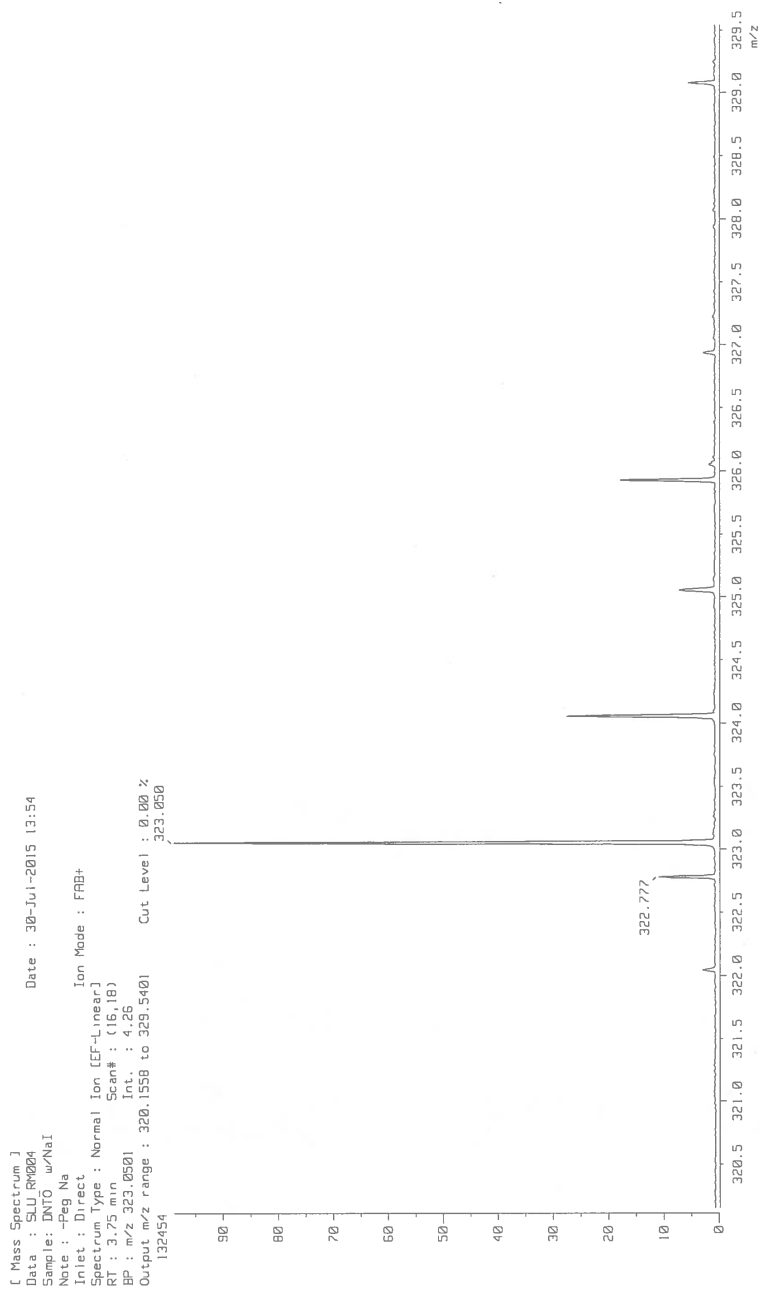

HPLC trace of compound 4

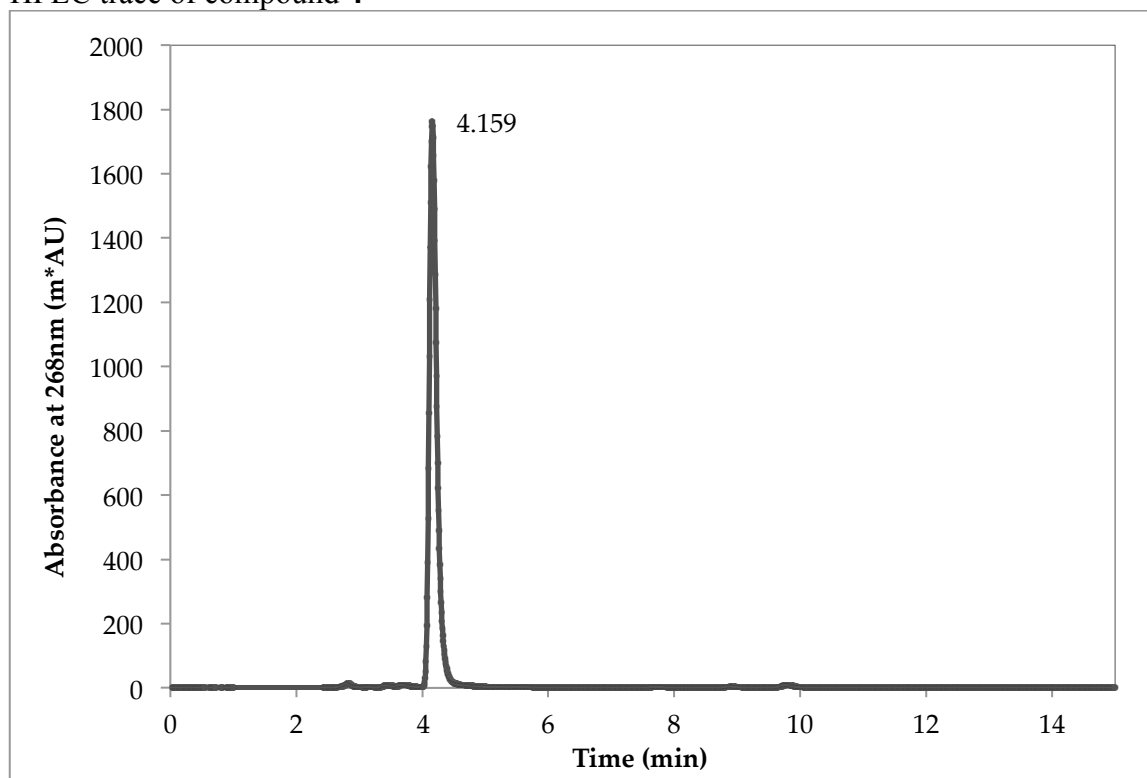

<sup>1</sup>H-NMR of 3,4-bis[(1E)-2-phenylethenyl]-thiophene in DMSO-d<sub>6</sub>

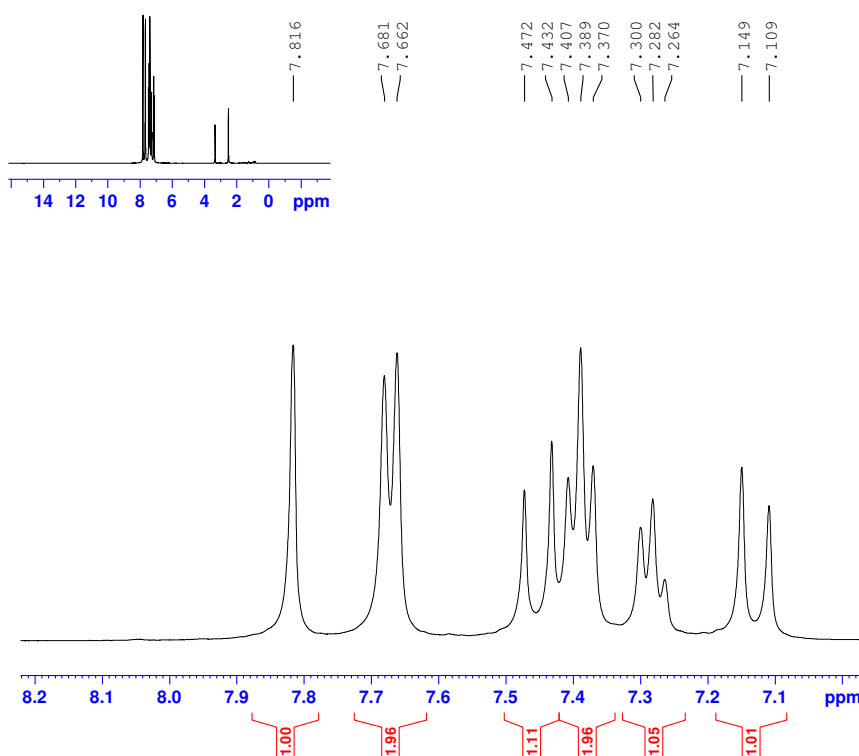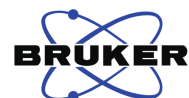

```

Current Data Parameters
NAME          xzheng8
EXPNO         75
PROCNO        1

F2 - Acquisition Parameters
Date_         20150822
Time          21.53
INSTRUM       spect
PROBHD        5 mm PABBO BB-
PULPROG       zg30
TD            65536
SOLVENT       DMSO
NS            16
DS            2
SWH           8012.820 Hz
FIDRES        0.122266 Hz
AQ            4.0894465 sec
RG            406
DW            62.400 usec
DE            6.50 usec
TE            298.2 K
D1            1.00000000 sec
TDO           1

===== CHANNEL f1 =====
SFO1          400.1324710 MHz
NUC1           1H
P1            13.75 usec
PLW1          11.30300045 W

F2 - Processing parameters
SI            65536
SF            400.1300000 MHz
WDW           EM
SSB           0
LB            0.30 Hz
GB            0
PC            1.00
    
```

<sup>13</sup>C-NMR of 3,4-bis[(1E)-2-phenylethenyl]-thiophene in DMSO-d<sub>6</sub>

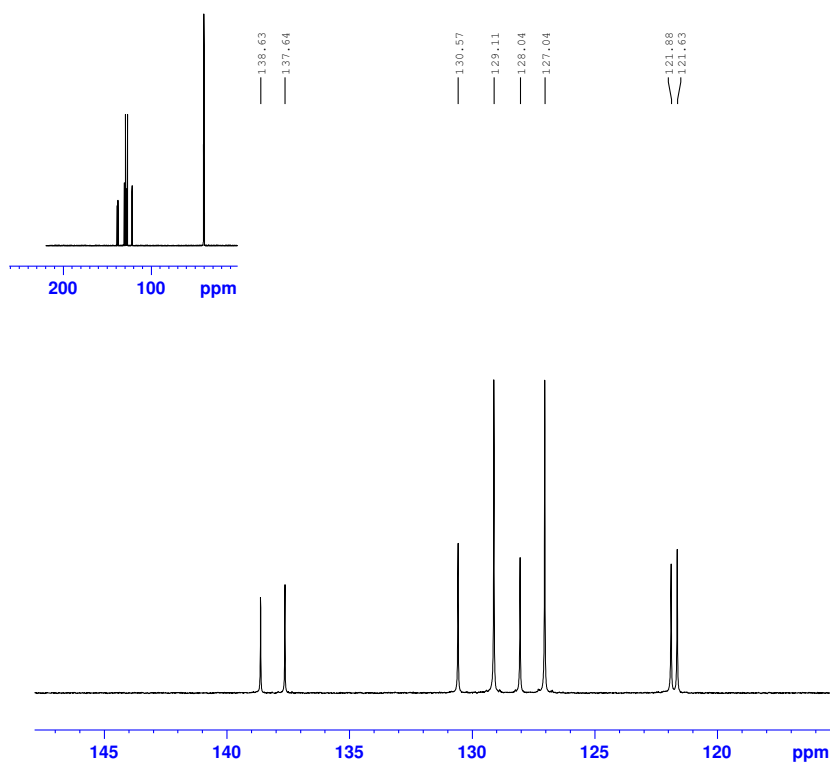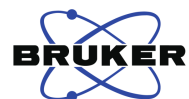

```

Current Data Parameters
NAME          xzheng8
EXPNO         76
PROCNO        1

F2 - Acquisition Parameters
Date_         20150823
Time          11.24
INSTRUM       spect
PROBHD        5 mm PABBO BB-
PULPROG       zgpg30
TD            65536
SOLVENT       DMSO
NS            14000
DS            4
SWH           24038.461 Hz
FIDRES        0.366798 Hz
AQ            1.3631488 sec
RG            1440
DW            20.800 usec
DE            6.50 usec
TE            298.4 K
D1            2.0000000 sec
D11           0.0300000 sec
TD0           1

===== CHANNEL f1 =====
SFO1          100.6228298 MHz
NUC1           13C
P1             8.50 usec
PLW1          61.42300034 W

===== CHANNEL f2 =====
SFO2          400.1316005 MHz
NUC2           1H
CPDPRG[2]     waltz16
PCPD2         90.00 usec
PLW2          11.30300045 W
PLW12         0.27351999 W
PLW13         0.22155000 W

F2 - Processing parameters
SI             32768
SF            100.6127690 MHz
WDW           EM
SSB           0
LB            1.00 Hz
GB            0
PC            1.40
    
```

# HRMS of 3,4-bis[(1E)-2-phenylethenyl]-thiophene

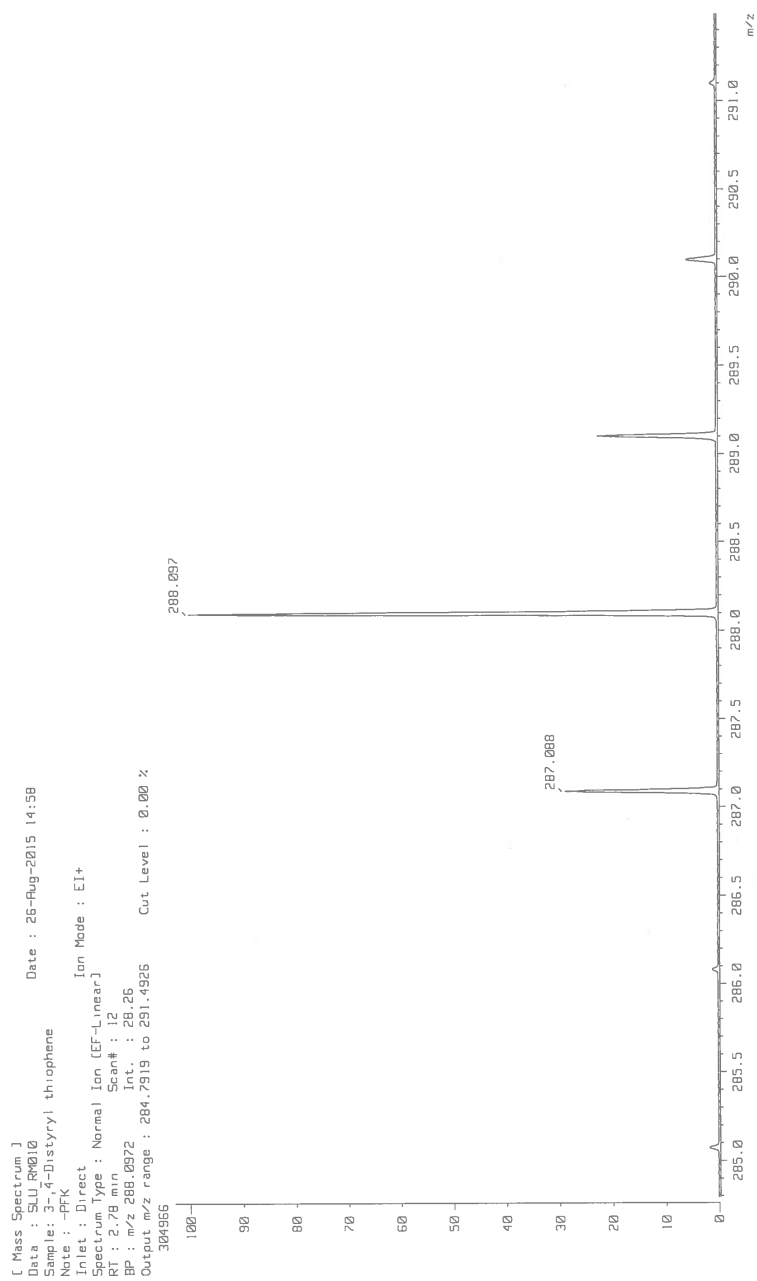

# <sup>1</sup>H-NMR of dinaphtho[1,2-b:2',1'-d]thiophene in CDCl<sub>3</sub>

DNT up

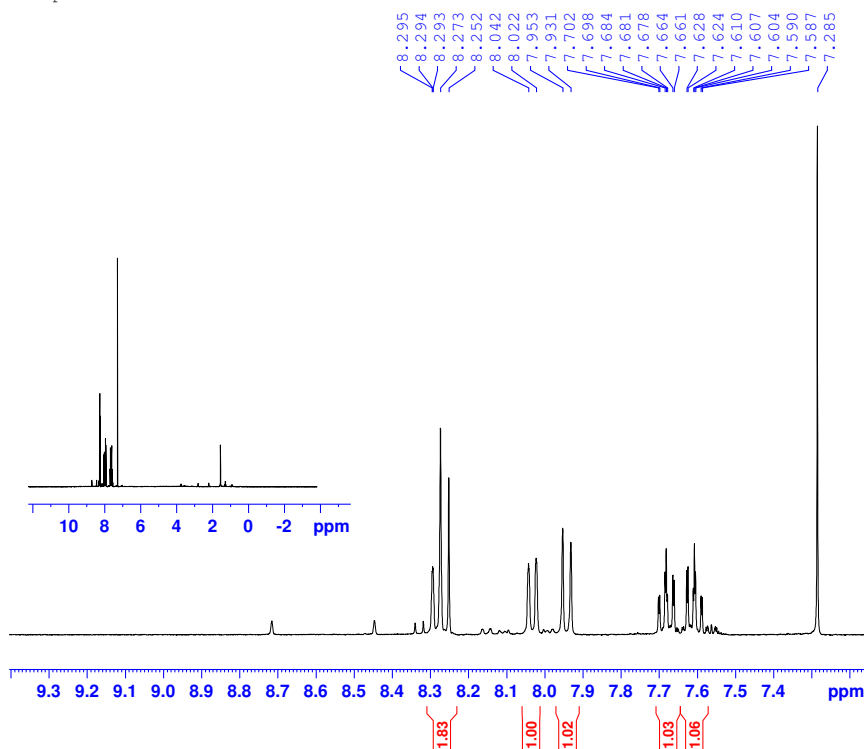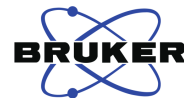

```

Current Data Parameters
NAME          xzheng8
EXPNO         71
PROCNO        1

F2 - Acquisition Parameters
Date_         20150805
Time          19.17
INSTRUM       spect
PROBHD        5 mm PABBO BB-
PULPROG       zg30
TD            65536
SOLVENT       CDCl3
NS            16
DS            2
SWH           8012.820 Hz
FIDRES        0.122266 Hz
AQ            4.0894465 sec
RG            1030
DW            62.400 usec
DE            6.50 usec
TE            298.1 K
D1            1.00000000 sec
TD0           1

===== CHANNEL f1 =====
SFO1          400.1324710 MHz
NUC1           1H
P1            13.75 usec
PLW1          11.30300045 W

F2 - Processing parameters
SI            65536
SF            400.1300000 MHz
WDW           EM
SSB           0
LB            0.30 Hz
GB            0
FC            1.00
    
```



<sup>13</sup>C NMR of **dinaphtho[1,2-b:2',1'-d]thiophene** in CDCl<sub>3</sub>

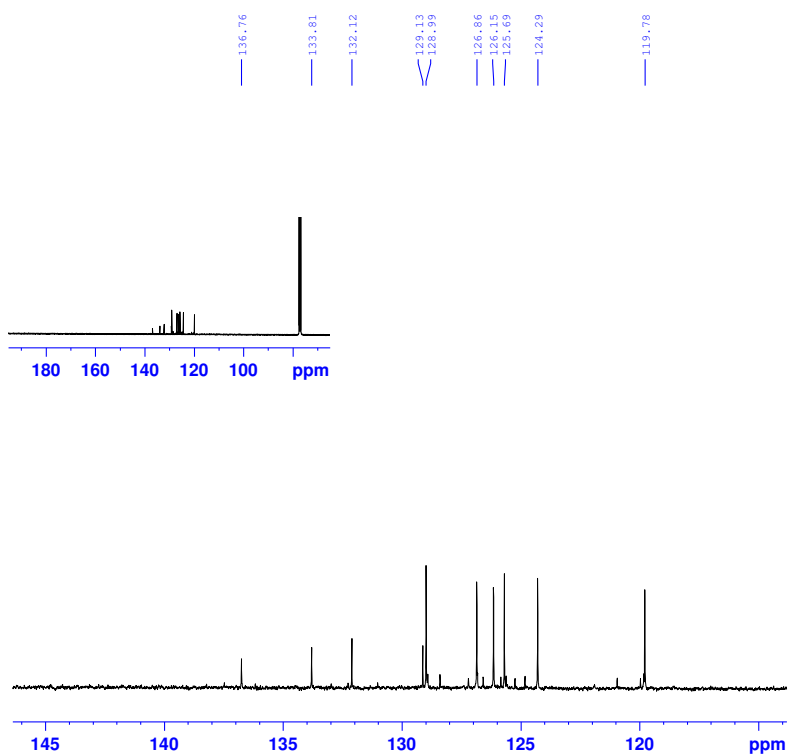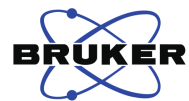

Current Data Parameters  
NAME xzheng8  
EXPNO 72  
PROCNO 1

F2 - Acquisition Parameters  
Date\_ 20150806  
Time 7.44  
INSTRUM spect  
PROBHD 5 mm PABBO BB-  
PULPROG zgpg30  
TD 65536  
SOLVENT CDCl3  
NS 14000  
DS 4  
SWH 24038.461 Hz  
FIDRES 0.366798 Hz  
AQ 1.3631488 sec  
RG 1620  
DW 20.800 usec  
DE 6.50 usec  
TE 299.1 K  
D1 2.0000000 sec  
D11 0.03000000 sec  
TD0 1

==== CHANNEL f1 =====  
SFO1 100.6228298 MHz  
NUC1 13C  
P1 8.50 usec  
PLW1 61.4230034 W

==== CHANNEL f2 =====  
SFO2 400.1316005 MHz  
NUC2 1H  
PCPDG[2] waltz16  
PCPD2 90.00 usec  
PLW2 11.3030045 W  
PLW12 0.27351999 W  
PLW13 0.22155000 W

F2 - Processing parameters  
SI 32768  
SF 100.6127690 MHz  
WDW EM  
SSB 0  
LB 1.00 Hz  
GB 0  
PC 1.40

# HRMS of dinaphtho[1,2-b:2',1'-d]thiophene

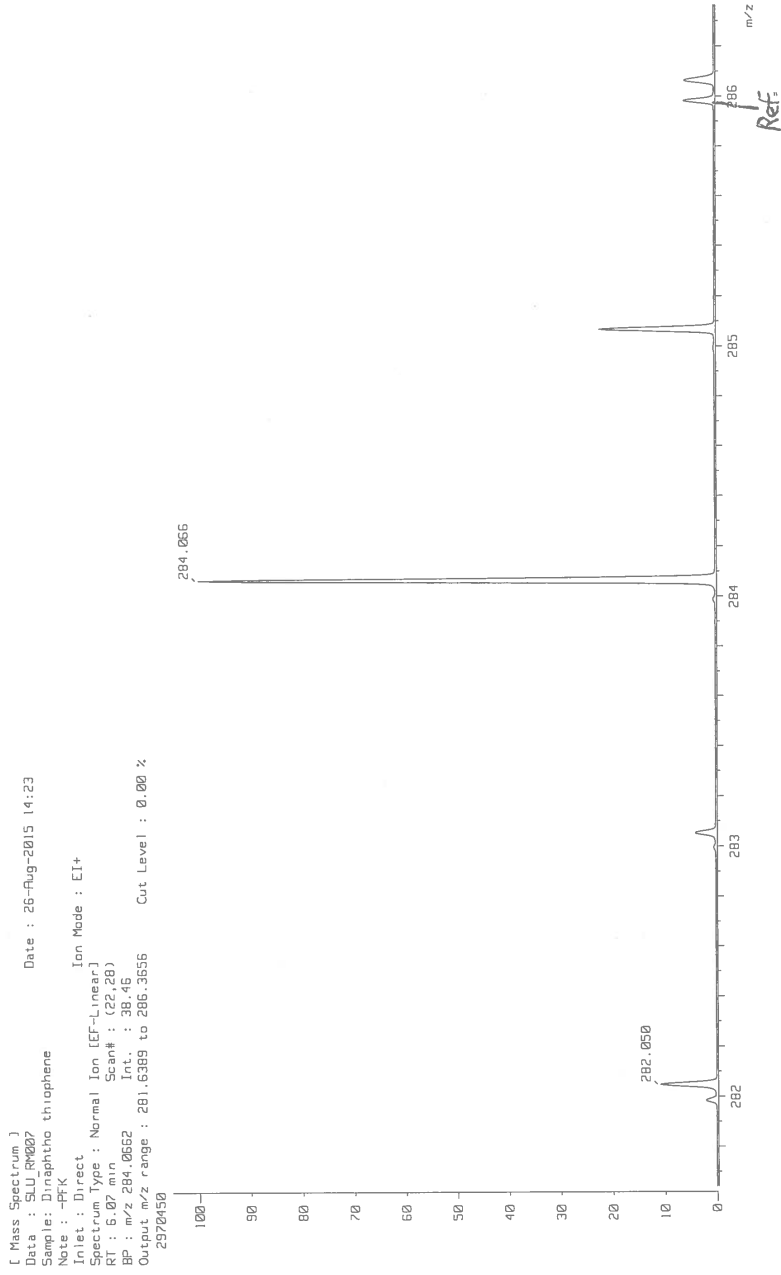

**dinaphtho[1,2-*b*:2',1'-*d*]thiophene *S*-oxide (5).**

<sup>1</sup>H-NMR of compound **5** in CDCl<sub>3</sub>

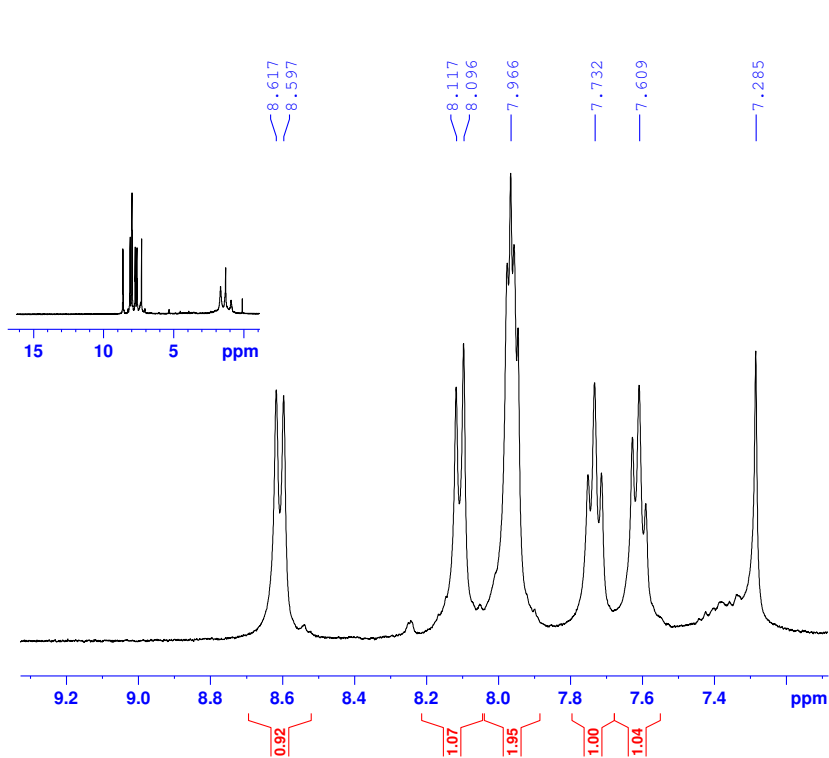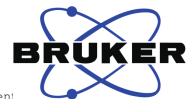

```
Current:
NAME      xzheng8
EXPNO     73
PROCNO    1

F2 - Acquisition Parameters
Date_     20150807
Time      16.32
INSTRUM   spect
PROBHD    5 mm PABBO BB-
PULPROG   zg30
TD        65536
SOLVENT   CDCl3
NS        16
DS        2
SWH       8012.820 Hz
FIDRES    0.122266 Hz
AQ        4.0894465 sec
RG        724
DW        62.400 usec
DE        6.50 usec
TE        298.1 K
D1        1.00000000 sec
TDO       1

===== CHANNEL f1 =====
SF01      400.1324710 MHz
NUC1      1H
P1        13.75 usec
PLW1      11.30300045 W

F2 - Processing parameters
SI        65536
SF        400.1300000 MHz
WDW       EM
SSB       0
LB        0.30 Hz
GB        0
PC        1.00
```

$^{13}\text{C}$ -NMR of compound **5** in  $\text{CDCl}_3$

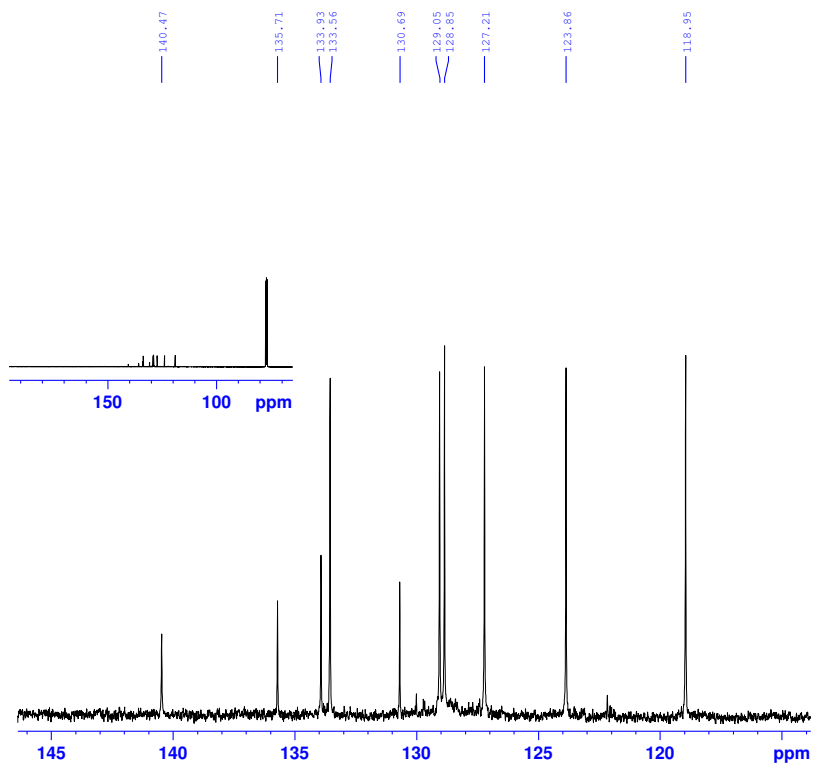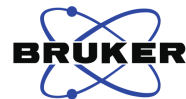

Current Data Parameters  
NAME xzheng8  
EXPNO 74  
PROCNO 1

F2 - Acquisition Parameters  
Date\_ 20150807  
Time 16.43  
INSTRUM spect  
PROBHD 5 mm PABBO BB-  
PULPROG zgpg30  
TD 65536  
SOLVENT CDCl3  
NS 14000  
DS 4  
SWH 24038.461 Hz  
FIDRES 0.366798 Hz  
AQ 1.3631488 sec  
RG 1820  
DW 20.800 usec  
DE 6.50 usec  
TE 298.6 K  
D1 2.0000000 sec  
D11 0.0300000 sec  
TDO 1

===== CHANNEL f1 =====  
SFO1 100.6228298 MHz  
NUC1 13C  
P1 8.50 usec  
PLW1 61.42300034 W

===== CHANNEL f2 =====  
SFO2 400.1316005 MHz  
NUC2 1H  
CPDPRG[2] waltz16  
PCPD2 90.00 usec  
PLW2 11.30300045 W  
PLW12 0.27351999 W  
PLW13 0.22155000 W

F2 - Processing parameters  
SI 32768  
SF 100.6127690 MHz  
WDW EM  
SSB 0  
LB 1.00 Hz  
GB 0  
PC 1.40

# HRMS of compound 5

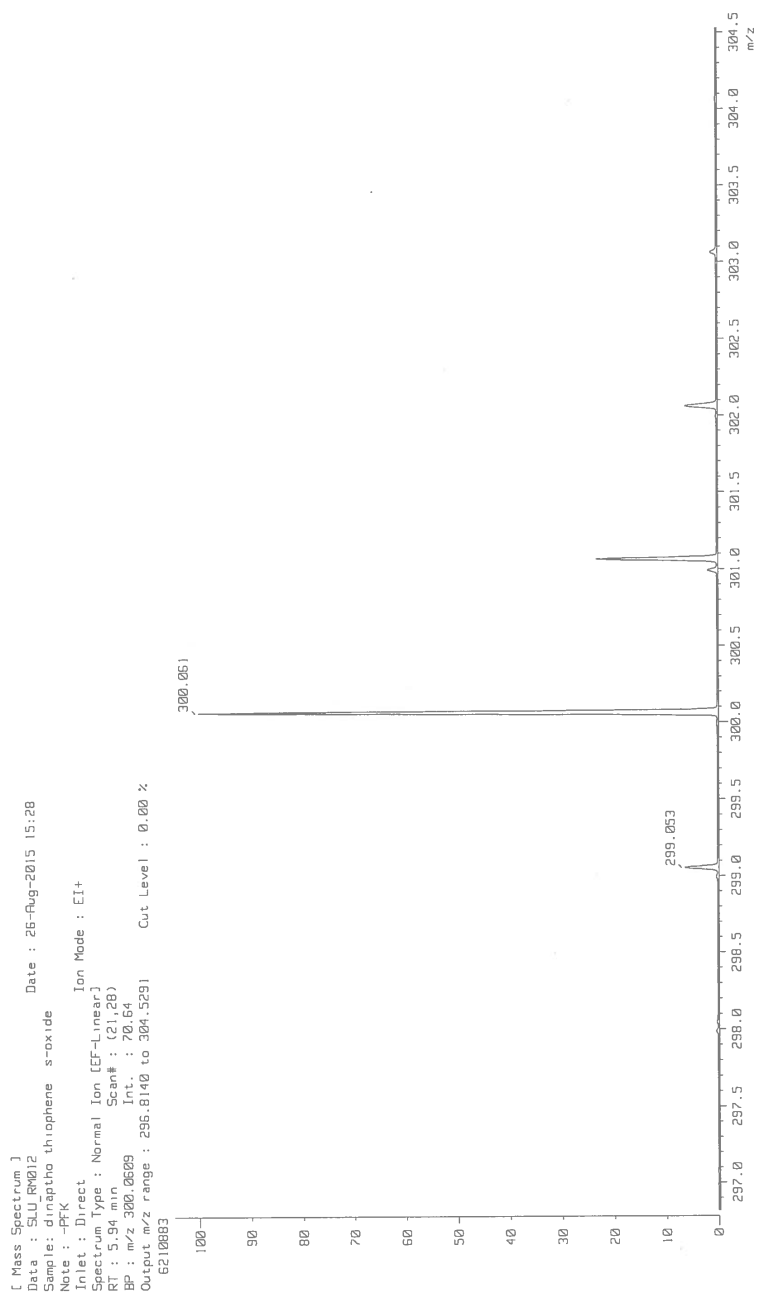

HPLC trace for compound 5

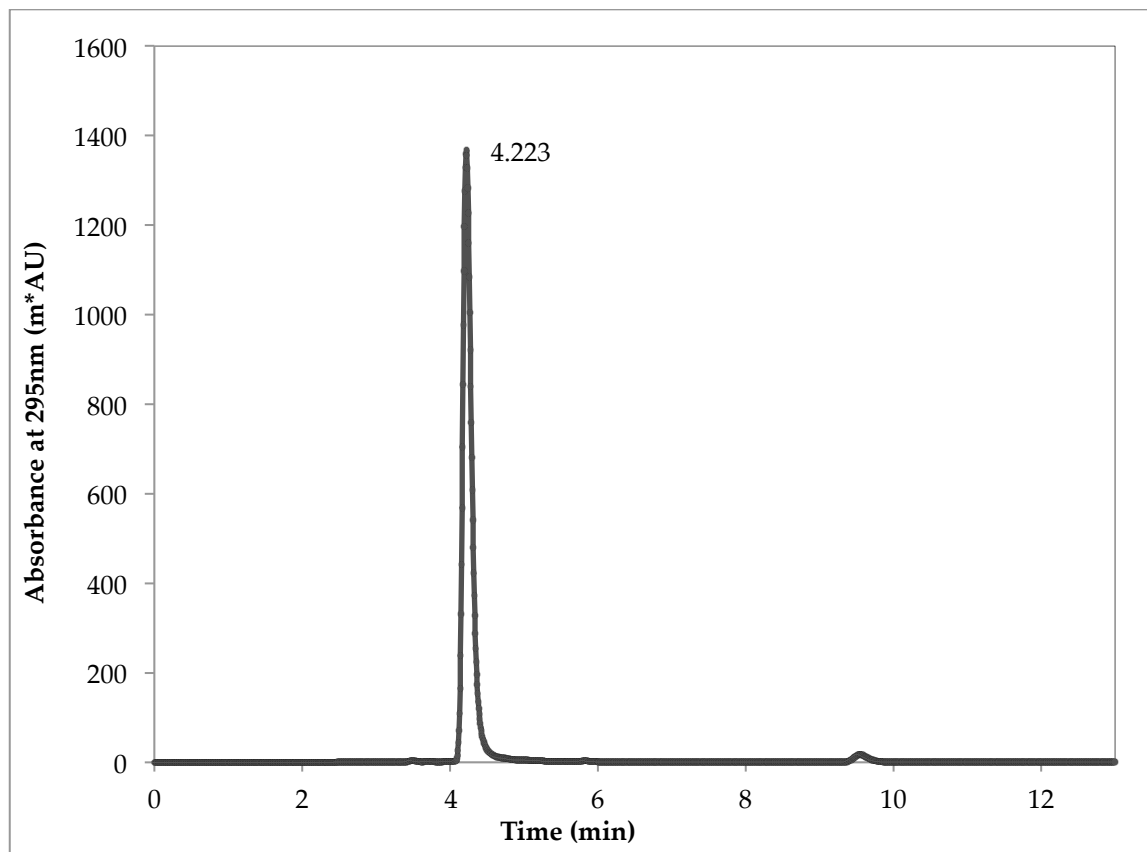

## Computational Results

### *Calculations for Excited State Energies*

Dibenzothiophene *S*-oxide (**DBTO**)  $S_0$  state

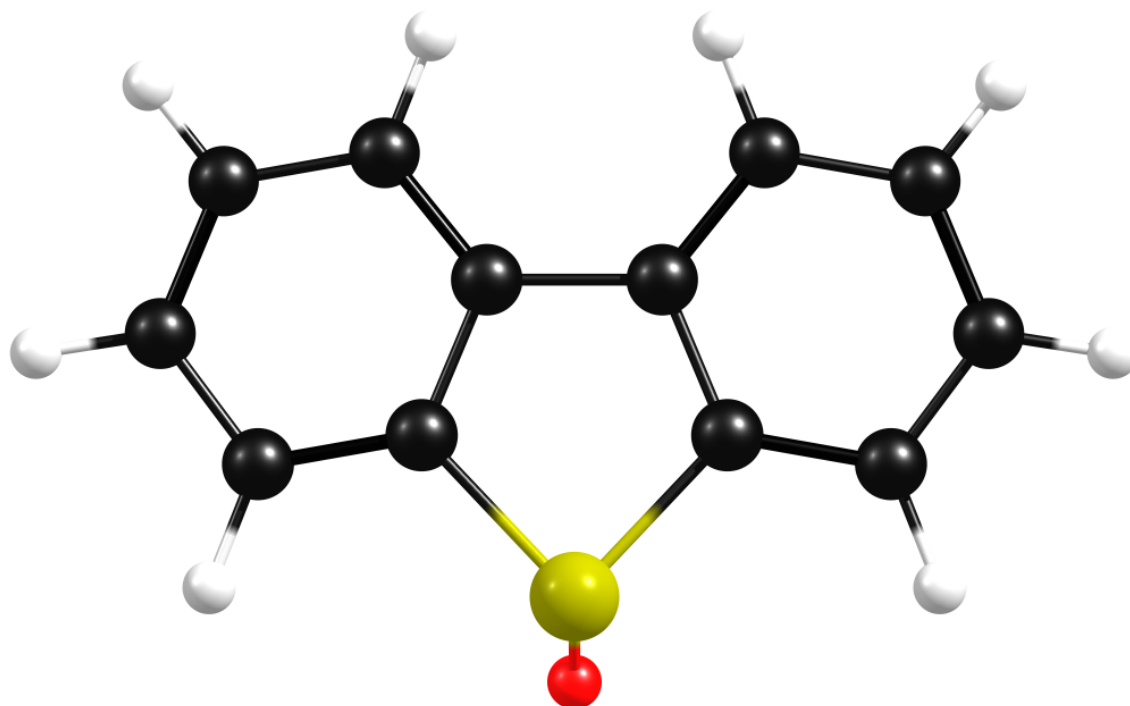

B3LYP/6-31G(d,p) optimization and Hessian

Coordinates

|   |           |           |           |
|---|-----------|-----------|-----------|
| S | 0.000013  | 1.765873  | -0.408312 |
| C | 1.611913  | -1.891700 | 0.067006  |
| C | 0.735551  | -0.807517 | -0.040894 |
| C | 2.988848  | -1.658283 | 0.098599  |
| H | 3.670962  | -2.498441 | 0.192409  |
| C | 1.267361  | 0.489072  | -0.142909 |
| C | 3.500025  | -0.358118 | 0.017258  |
| H | 4.573136  | -0.193863 | 0.056554  |
| C | 2.634117  | 0.732203  | -0.116150 |
| H | 3.018982  | 1.745792  | -0.184679 |
| H | 1.229158  | -2.906176 | 0.136812  |
| C | -2.988899 | -1.658220 | 0.098570  |
| C | -3.500048 | -0.358044 | 0.017222  |
| C | -1.611968 | -1.891666 | 0.066991  |
| H | -4.573155 | -0.193766 | 0.056507  |

|   |           |           |           |
|---|-----------|-----------|-----------|
| H | -1.229238 | -2.906151 | 0.136801  |
| C | -2.634115 | 0.732258  | -0.116177 |
| C | -0.735582 | -0.807502 | -0.040902 |
| H | -3.018958 | 1.745856  | -0.184710 |
| C | -1.267364 | 0.489098  | -0.142921 |
| H | -3.671030 | -2.498364 | 0.192373  |
| O | 0.000017  | 2.818084  | 0.678590  |

### Frequencies

|     |         |                    |
|-----|---------|--------------------|
| 0:  | 0.00    | cm** <sup>-1</sup> |
| 1:  | 0.00    | cm** <sup>-1</sup> |
| 2:  | 0.00    | cm** <sup>-1</sup> |
| 3:  | 0.00    | cm** <sup>-1</sup> |
| 4:  | 0.00    | cm** <sup>-1</sup> |
| 5:  | 0.00    | cm** <sup>-1</sup> |
| 6:  | 81.47   | cm** <sup>-1</sup> |
| 7:  | 116.59  | cm** <sup>-1</sup> |
| 8:  | 123.39  | cm** <sup>-1</sup> |
| 9:  | 174.02  | cm** <sup>-1</sup> |
| 10: | 197.60  | cm** <sup>-1</sup> |
| 11: | 283.20  | cm** <sup>-1</sup> |
| 12: | 347.20  | cm** <sup>-1</sup> |
| 13: | 397.84  | cm** <sup>-1</sup> |
| 14: | 405.74  | cm** <sup>-1</sup> |
| 15: | 421.98  | cm** <sup>-1</sup> |
| 16: | 443.89  | cm** <sup>-1</sup> |
| 17: | 487.47  | cm** <sup>-1</sup> |
| 18: | 498.86  | cm** <sup>-1</sup> |
| 19: | 565.63  | cm** <sup>-1</sup> |
| 20: | 568.03  | cm** <sup>-1</sup> |
| 21: | 628.01  | cm** <sup>-1</sup> |
| 22: | 697.52  | cm** <sup>-1</sup> |
| 23: | 699.18  | cm** <sup>-1</sup> |
| 24: | 730.90  | cm** <sup>-1</sup> |
| 25: | 746.38  | cm** <sup>-1</sup> |
| 26: | 768.45  | cm** <sup>-1</sup> |
| 27: | 774.36  | cm** <sup>-1</sup> |
| 28: | 788.44  | cm** <sup>-1</sup> |
| 29: | 880.79  | cm** <sup>-1</sup> |
| 30: | 881.27  | cm** <sup>-1</sup> |
| 31: | 949.49  | cm** <sup>-1</sup> |
| 32: | 949.77  | cm** <sup>-1</sup> |
| 33: | 989.65  | cm** <sup>-1</sup> |
| 34: | 991.78  | cm** <sup>-1</sup> |
| 35: | 1016.92 | cm** <sup>-1</sup> |
| 36: | 1046.26 | cm** <sup>-1</sup> |
| 37: | 1050.35 | cm** <sup>-1</sup> |



38: 1058.02 cm\*\*<sup>-1</sup>  
 39: 1083.54 cm\*\*<sup>-1</sup>  
 40: 1087.38 cm\*\*<sup>-1</sup>  
 41: 1143.25 cm\*\*<sup>-1</sup>  
 42: 1152.10 cm\*\*<sup>-1</sup>  
 43: 1187.64 cm\*\*<sup>-1</sup>  
 44: 1188.43 cm\*\*<sup>-1</sup>  
 45: 1249.12 cm\*\*<sup>-1</sup>  
 46: 1297.32 cm\*\*<sup>-1</sup>  
 47: 1325.00 cm\*\*<sup>-1</sup>  
 48: 1345.55 cm\*\*<sup>-1</sup>  
 49: 1382.94 cm\*\*<sup>-1</sup>  
 50: 1468.54 cm\*\*<sup>-1</sup>  
 51: 1483.25 cm\*\*<sup>-1</sup>  
 52: 1503.25 cm\*\*<sup>-1</sup>  
 53: 1514.91 cm\*\*<sup>-1</sup>  
 54: 1623.95 cm\*\*<sup>-1</sup>  
 55: 1632.39 cm\*\*<sup>-1</sup>  
 56: 1642.14 cm\*\*<sup>-1</sup>  
 57: 1642.87 cm\*\*<sup>-1</sup>  
 58: 3180.84 cm\*\*<sup>-1</sup>  
 59: 3183.08 cm\*\*<sup>-1</sup>  
 60: 3188.87 cm\*\*<sup>-1</sup>  
 61: 3191.16 cm\*\*<sup>-1</sup>  
 62: 3199.35 cm\*\*<sup>-1</sup>  
 63: 3200.02 cm\*\*<sup>-1</sup>  
 64: 3208.09 cm\*\*<sup>-1</sup>  
 65: 3208.67 cm\*\*<sup>-1</sup>

|                              |                       |
|------------------------------|-----------------------|
| Electronic energy            | -935.07271882 hartree |
| Total thermal correction     | 0.01040464 hartree    |
| Non-thermal (ZPE) correction | 0.16465251 hartree    |
| Total thermal energy         | -934.89766167 hartree |
| Total Enthalpy               | -934.89671746 hartree |
| Final Gibbs free enthalpy    | -934.94341453 hartree |

#### Energy Calculations at this geometry

S<sub>0</sub>

|                        |                       |
|------------------------|-----------------------|
| HF/aug-cc-pV(T+d)Z     | -931.62849918 hartree |
| M06-2X/aug-cc-pV(T+d)Z | -935.46314647 hartree |
| B3LYP/aug-cc-pV(T+d)Z  | -935.32243398 hartree |

T<sub>2</sub>

|                     |                       |
|---------------------|-----------------------|
| TD-B3LYP/6-31G(d,p) | -934.94440827 hartree |
|---------------------|-----------------------|

Dibenzothiophene *S*-oxide (**DBTO**)  $S_1$  state

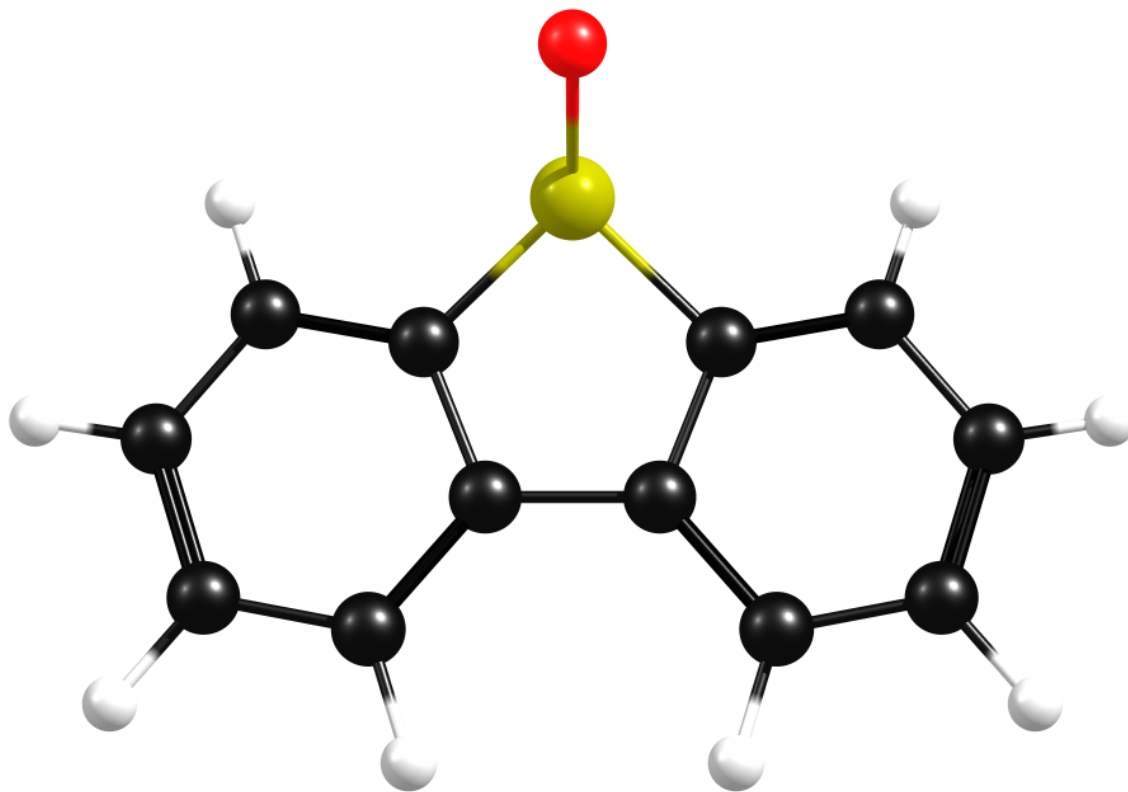

TD-B3LYP/6-31G(d,p) optimization and Hessian

Coordinates

|   |           |           |           |
|---|-----------|-----------|-----------|
| C | -3.510140 | -0.328369 | -0.190588 |
| C | -3.001928 | -1.615991 | 0.114753  |
| C | -2.638877 | 0.739866  | -0.359299 |
| H | -3.695602 | -2.438028 | 0.265901  |
| H | -3.014499 | 1.738287  | -0.564480 |
| C | -1.638253 | -1.848885 | 0.228926  |
| C | -1.265688 | 0.494017  | -0.262576 |
| H | -1.275700 | -2.845178 | 0.467980  |
| C | -0.717773 | -0.803278 | 0.025218  |
| H | -4.580087 | -0.174920 | -0.288417 |
| C | 0.717773  | -0.803277 | 0.025218  |
| C | 1.638255  | -1.848884 | 0.228926  |
| C | 1.265688  | 0.494018  | -0.262576 |
| H | 1.275702  | -2.845177 | 0.467980  |
| C | 3.001929  | -1.615989 | 0.114753  |
| C | 2.638876  | 0.739867  | -0.359299 |
| H | 3.695604  | -2.438026 | 0.265901  |
| H | 3.014498  | 1.738289  | -0.564480 |
| C | 3.510141  | -0.328367 | -0.190588 |

|   |           |           |           |
|---|-----------|-----------|-----------|
| H | 4.580087  | -0.174917 | -0.288417 |
| S | -0.000001 | 1.714318  | -0.225780 |
| O | -0.000001 | 2.551487  | 1.106285  |

### Frequencies

|     |         |                    |
|-----|---------|--------------------|
| 0:  | 0.00    | cm** <sup>-1</sup> |
| 1:  | 0.00    | cm** <sup>-1</sup> |
| 2:  | 0.00    | cm** <sup>-1</sup> |
| 3:  | 0.00    | cm** <sup>-1</sup> |
| 4:  | 0.00    | cm** <sup>-1</sup> |
| 5:  | 0.00    | cm** <sup>-1</sup> |
| 6:  | 90.78   | cm** <sup>-1</sup> |
| 7:  | 125.73  | cm** <sup>-1</sup> |
| 8:  | 143.56  | cm** <sup>-1</sup> |
| 9:  | 145.56  | cm** <sup>-1</sup> |
| 10: | 210.58  | cm** <sup>-1</sup> |
| 11: | 260.43  | cm** <sup>-1</sup> |
| 12: | 261.36  | cm** <sup>-1</sup> |
| 13: | 395.63  | cm** <sup>-1</sup> |
| 14: | 405.17  | cm** <sup>-1</sup> |
| 15: | 412.96  | cm** <sup>-1</sup> |
| 16: | 420.26  | cm** <sup>-1</sup> |
| 17: | 447.78  | cm** <sup>-1</sup> |
| 18: | 487.17  | cm** <sup>-1</sup> |
| 19: | 514.77  | cm** <sup>-1</sup> |
| 20: | 546.58  | cm** <sup>-1</sup> |
| 21: | 612.62  | cm** <sup>-1</sup> |
| 22: | 667.85  | cm** <sup>-1</sup> |
| 23: | 691.49  | cm** <sup>-1</sup> |
| 24: | 703.67  | cm** <sup>-1</sup> |
| 25: | 710.51  | cm** <sup>-1</sup> |
| 26: | 728.36  | cm** <sup>-1</sup> |
| 27: | 738.13  | cm** <sup>-1</sup> |
| 28: | 742.60  | cm** <sup>-1</sup> |
| 29: | 784.63  | cm** <sup>-1</sup> |
| 30: | 842.89  | cm** <sup>-1</sup> |
| 31: | 843.79  | cm** <sup>-1</sup> |
| 32: | 931.39  | cm** <sup>-1</sup> |
| 33: | 931.55  | cm** <sup>-1</sup> |
| 34: | 959.23  | cm** <sup>-1</sup> |
| 35: | 962.77  | cm** <sup>-1</sup> |
| 36: | 999.45  | cm** <sup>-1</sup> |
| 37: | 1008.47 | cm** <sup>-1</sup> |
| 38: | 1031.10 | cm** <sup>-1</sup> |
| 39: | 1038.06 | cm** <sup>-1</sup> |
| 40: | 1071.05 | cm** <sup>-1</sup> |
| 41: | 1150.03 | cm** <sup>-1</sup> |

42: 1159.08 cm\*\*<sup>-1</sup>  
 43: 1184.72 cm\*\*<sup>-1</sup>  
 44: 1186.80 cm\*\*<sup>-1</sup>  
 45: 1221.54 cm\*\*<sup>-1</sup>  
 46: 1288.81 cm\*\*<sup>-1</sup>  
 47: 1354.33 cm\*\*<sup>-1</sup>  
 48: 1359.93 cm\*\*<sup>-1</sup>  
 49: 1385.42 cm\*\*<sup>-1</sup>  
 50: 1462.38 cm\*\*<sup>-1</sup>  
 51: 1467.37 cm\*\*<sup>-1</sup>  
 52: 1479.72 cm\*\*<sup>-1</sup>  
 53: 1522.63 cm\*\*<sup>-1</sup>  
 54: 1556.76 cm\*\*<sup>-1</sup>  
 55: 1556.80 cm\*\*<sup>-1</sup>  
 56: 1581.78 cm\*\*<sup>-1</sup>  
 57: 1605.15 cm\*\*<sup>-1</sup>  
 58: 3178.70 cm\*\*<sup>-1</sup>  
 59: 3181.67 cm\*\*<sup>-1</sup>  
 60: 3189.63 cm\*\*<sup>-1</sup>  
 61: 3190.41 cm\*\*<sup>-1</sup>  
 62: 3198.48 cm\*\*<sup>-1</sup>  
 63: 3199.38 cm\*\*<sup>-1</sup>  
 64: 3212.66 cm\*\*<sup>-1</sup>  
 65: 3213.02 cm\*\*<sup>-1</sup>

|                              |                       |
|------------------------------|-----------------------|
| Electronic energy            | -934.95814213 hartree |
| Total thermal correction     | 0.01081340 hartree    |
| Non-thermal (ZPE) correction | 0.16164766 hartree    |
| Total thermal energy         | -934.78568554 hartree |
| Total Enthalpy               | -934.78474133 hartree |
| Final Gibbs free enthalpy    | -934.83196261 hartree |

Energy Calculations at above geometry

S<sub>1</sub>

|                          |                       |
|--------------------------|-----------------------|
| CIS/aug-cc-pV(T+d)Z      | -931.44678615 hartree |
| M06-2X/aug-cc-pV(T+d)Z   | -935.32784267 hartree |
| TD-B3LYP/aug-cc-pV(T+d)Z | -935.20429725 hartree |

T<sub>2</sub>

|                     |                       |
|---------------------|-----------------------|
| TD-B3LYP/6-31G(d,p) | -934.95133824 hartree |
|---------------------|-----------------------|

Dibenzothiophene *S*-oxide (**DBTO**)  $T_1$  state

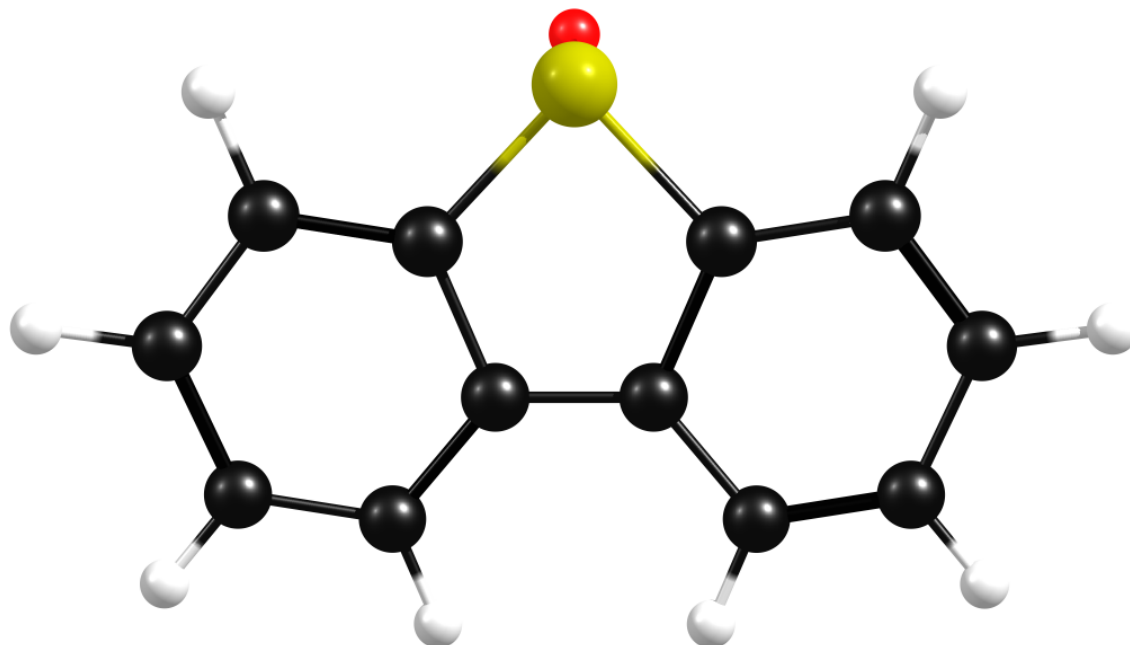

B3LYP/6-31G(d,p) optimization and Hessian

Coordinates

|   |           |           |           |
|---|-----------|-----------|-----------|
| C | -4.152854 | 1.239011  | 0.063778  |
| C | -4.426955 | -0.159325 | -0.118826 |
| C | -3.373907 | -1.088853 | -0.199480 |
| C | -2.872963 | 1.709905  | 0.145968  |
| C | -2.073956 | -0.641376 | -0.123555 |
| C | -1.764159 | 0.784965  | 0.044320  |
| H | -4.988460 | 1.928792  | 0.140034  |
| H | -5.455576 | -0.497989 | -0.189275 |
| H | -3.588847 | -2.147951 | -0.315816 |
| H | -2.679175 | 2.768603  | 0.292302  |
| S | -0.617128 | -1.718204 | -0.114763 |
| C | 0.379579  | -0.205335 | -0.119931 |
| C | -0.403222 | 1.026774  | 0.045451  |
| C | 1.682297  | 2.276419  | 0.066958  |
| C | 1.754367  | -0.177821 | -0.191027 |
| C | 2.422413  | 1.057865  | -0.110440 |
| C | 0.318526  | 2.277421  | 0.146222  |
| H | -0.228567 | 3.204717  | 0.288087  |
| H | 2.228550  | 3.212470  | 0.141353  |
| H | 3.505116  | 1.094988  | -0.178665 |
| H | 2.321031  | -1.098368 | -0.302831 |
| O | -0.492516 | -2.431055 | 1.218788  |

## Frequencies

|     |         |                    |
|-----|---------|--------------------|
| 0:  | 0.00    | cm** <sup>-1</sup> |
| 1:  | 0.00    | cm** <sup>-1</sup> |
| 2:  | 0.00    | cm** <sup>-1</sup> |
| 3:  | 0.00    | cm** <sup>-1</sup> |
| 4:  | 0.00    | cm** <sup>-1</sup> |
| 5:  | 0.00    | cm** <sup>-1</sup> |
| 6:  | 64.73   | cm** <sup>-1</sup> |
| 7:  | 117.02  | cm** <sup>-1</sup> |
| 8:  | 125.29  | cm** <sup>-1</sup> |
| 9:  | 151.14  | cm** <sup>-1</sup> |
| 10: | 205.10  | cm** <sup>-1</sup> |
| 11: | 269.47  | cm** <sup>-1</sup> |
| 12: | 300.56  | cm** <sup>-1</sup> |
| 13: | 374.04  | cm** <sup>-1</sup> |
| 14: | 396.16  | cm** <sup>-1</sup> |
| 15: | 402.07  | cm** <sup>-1</sup> |
| 16: | 437.18  | cm** <sup>-1</sup> |
| 17: | 455.25  | cm** <sup>-1</sup> |
| 18: | 482.56  | cm** <sup>-1</sup> |
| 19: | 490.98  | cm** <sup>-1</sup> |
| 20: | 522.40  | cm** <sup>-1</sup> |
| 21: | 578.47  | cm** <sup>-1</sup> |
| 22: | 651.04  | cm** <sup>-1</sup> |
| 23: | 670.34  | cm** <sup>-1</sup> |
| 24: | 673.37  | cm** <sup>-1</sup> |
| 25: | 689.29  | cm** <sup>-1</sup> |
| 26: | 717.72  | cm** <sup>-1</sup> |
| 27: | 748.50  | cm** <sup>-1</sup> |
| 28: | 754.67  | cm** <sup>-1</sup> |
| 29: | 813.41  | cm** <sup>-1</sup> |
| 30: | 815.15  | cm** <sup>-1</sup> |
| 31: | 907.68  | cm** <sup>-1</sup> |
| 32: | 929.87  | cm** <sup>-1</sup> |
| 33: | 930.66  | cm** <sup>-1</sup> |
| 34: | 968.89  | cm** <sup>-1</sup> |
| 35: | 972.62  | cm** <sup>-1</sup> |
| 36: | 989.39  | cm** <sup>-1</sup> |
| 37: | 989.98  | cm** <sup>-1</sup> |
| 38: | 1018.18 | cm** <sup>-1</sup> |
| 39: | 1037.61 | cm** <sup>-1</sup> |
| 40: | 1056.62 | cm** <sup>-1</sup> |
| 41: | 1099.65 | cm** <sup>-1</sup> |
| 42: | 1132.93 | cm** <sup>-1</sup> |
| 43: | 1135.12 | cm** <sup>-1</sup> |
| 44: | 1168.25 | cm** <sup>-1</sup> |
| 45: | 1220.45 | cm** <sup>-1</sup> |

46: 1273.74 cm\*\*<sup>-1</sup>  
 47: 1349.60 cm\*\*<sup>-1</sup>  
 48: 1368.46 cm\*\*<sup>-1</sup>  
 49: 1378.28 cm\*\*<sup>-1</sup>  
 50: 1384.13 cm\*\*<sup>-1</sup>  
 51: 1408.49 cm\*\*<sup>-1</sup>  
 52: 1441.86 cm\*\*<sup>-1</sup>  
 53: 1495.87 cm\*\*<sup>-1</sup>  
 54: 1542.88 cm\*\*<sup>-1</sup>  
 55: 1558.07 cm\*\*<sup>-1</sup>  
 56: 1563.58 cm\*\*<sup>-1</sup>  
 57: 1653.40 cm\*\*<sup>-1</sup>  
 58: 3184.30 cm\*\*<sup>-1</sup>  
 59: 3185.75 cm\*\*<sup>-1</sup>  
 60: 3189.40 cm\*\*<sup>-1</sup>  
 61: 3190.55 cm\*\*<sup>-1</sup>  
 62: 3199.89 cm\*\*<sup>-1</sup>  
 63: 3202.63 cm\*\*<sup>-1</sup>  
 64: 3211.95 cm\*\*<sup>-1</sup>  
 65: 3214.19 cm\*\*<sup>-1</sup>

|                              |                       |
|------------------------------|-----------------------|
| Electronic energy            | -934.96804621 hartree |
| Total thermal correction     | 0.01096646 hartree    |
| Non-thermal (ZPE) correction | 0.16052162 hartree    |
| Total thermal energy         | -934.79655813 hartree |
| Total Enthalpy               | -934.79561392 hartree |
| Final Gibbs free enthalpy    | -934.84442766 hartree |

Energy Calculations at above geometry

T<sub>1</sub>

|                        |                       |
|------------------------|-----------------------|
| HF/aug-cc-pV(T+d)Z     | -931.49761692 hartree |
| M06-2X/aug-cc-pV(T+d)Z | -935.34749847 hartree |
| B3LYP/aug-cc-pV(T+d)Z  | -935.21953858 hartree |

T<sub>2</sub>

|                     |                       |
|---------------------|-----------------------|
| TD-B3LYP/6-31G(d,p) | -934.94651594 hartree |
|---------------------|-----------------------|

Benzo[b]naphtho[1,2,d]thiophene S-oxide (1) S<sub>0</sub> state

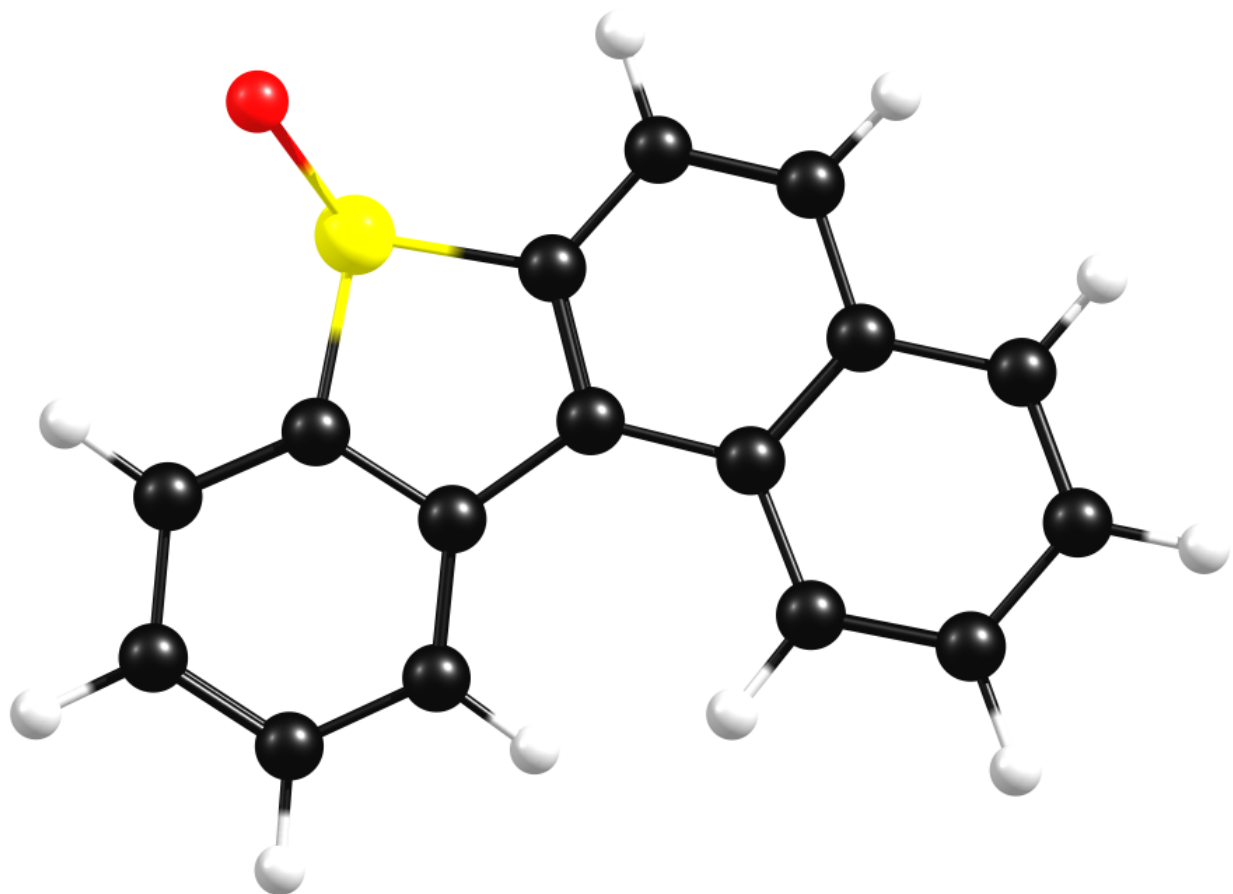

B3LYP/6-31G(d,p) optimization and Hessian

Coordinates

|   |           |           |           |
|---|-----------|-----------|-----------|
| S | 1.858197  | -1.730979 | -0.440421 |
| C | 1.224008  | 2.207909  | -0.113907 |
| C | 1.038428  | 0.816619  | -0.128366 |
| C | 2.512250  | 2.745346  | -0.038679 |
| H | 2.631291  | 3.825249  | -0.013751 |
| C | 2.201719  | 0.016936  | -0.145961 |
| C | 3.640522  | 1.924221  | 0.001598  |
| H | 4.632624  | 2.359305  | 0.077197  |
| C | 3.485480  | 0.537813  | -0.079110 |
| H | 4.347130  | -0.123775 | -0.082778 |
| H | 0.388599  | 2.890790  | -0.180166 |
| O | 2.374036  | -2.642565 | 0.651903  |
| C | -0.198486 | -0.005366 | -0.144788 |
| C | 0.098660  | -1.361048 | -0.252461 |



|   |           |           |           |
|---|-----------|-----------|-----------|
| C | -0.869101 | -2.378759 | -0.286931 |
| C | -2.194485 | -2.022521 | -0.214241 |
| C | -2.577512 | -0.658612 | -0.092907 |
| C | -1.580060 | 0.381285  | -0.038675 |
| C | -2.037003 | 1.715655  | 0.149317  |
| C | -3.379815 | 2.013474  | 0.239953  |
| C | -4.353064 | 0.993733  | 0.149613  |
| C | -3.953209 | -0.313083 | -0.006147 |
| H | -0.565086 | -3.418790 | -0.360893 |
| H | -2.971357 | -2.782112 | -0.237069 |
| H | -4.689282 | -1.111442 | -0.057790 |
| H | -5.408396 | 1.242138  | 0.217610  |
| H | -3.691133 | 3.043263  | 0.391407  |
| H | -1.324750 | 2.519740  | 0.259663  |

### Frequencies

|     |        |                    |
|-----|--------|--------------------|
| 0:  | 0.00   | cm** <sup>-1</sup> |
| 1:  | 0.00   | cm** <sup>-1</sup> |
| 2:  | 0.00   | cm** <sup>-1</sup> |
| 3:  | 0.00   | cm** <sup>-1</sup> |
| 4:  | 0.00   | cm** <sup>-1</sup> |
| 5:  | 0.00   | cm** <sup>-1</sup> |
| 6:  | 31.55  | cm** <sup>-1</sup> |
| 7:  | 77.85  | cm** <sup>-1</sup> |
| 8:  | 95.65  | cm** <sup>-1</sup> |
| 9:  | 147.32 | cm** <sup>-1</sup> |
| 10: | 174.23 | cm** <sup>-1</sup> |
| 11: | 178.43 | cm** <sup>-1</sup> |
| 12: | 213.10 | cm** <sup>-1</sup> |
| 13: | 281.16 | cm** <sup>-1</sup> |
| 14: | 301.54 | cm** <sup>-1</sup> |
| 15: | 350.41 | cm** <sup>-1</sup> |
| 16: | 380.76 | cm** <sup>-1</sup> |
| 17: | 408.07 | cm** <sup>-1</sup> |
| 18: | 419.65 | cm** <sup>-1</sup> |
| 19: | 436.94 | cm** <sup>-1</sup> |
| 20: | 473.80 | cm** <sup>-1</sup> |
| 21: | 502.36 | cm** <sup>-1</sup> |
| 22: | 533.11 | cm** <sup>-1</sup> |
| 23: | 541.53 | cm** <sup>-1</sup> |
| 24: | 554.39 | cm** <sup>-1</sup> |
| 25: | 584.12 | cm** <sup>-1</sup> |
| 26: | 620.52 | cm** <sup>-1</sup> |
| 27: | 643.06 | cm** <sup>-1</sup> |
| 28: | 678.17 | cm** <sup>-1</sup> |
| 29: | 699.91 | cm** <sup>-1</sup> |
| 30: | 719.88 | cm** <sup>-1</sup> |

31: 741.58 cm\*\*-1  
32: 749.95 cm\*\*-1  
33: 764.00 cm\*\*-1  
34: 797.93 cm\*\*-1  
35: 822.27 cm\*\*-1  
36: 834.30 cm\*\*-1  
37: 865.39 cm\*\*-1  
38: 876.57 cm\*\*-1  
39: 880.55 cm\*\*-1  
40: 941.85 cm\*\*-1  
41: 950.55 cm\*\*-1  
42: 965.23 cm\*\*-1  
43: 975.02 cm\*\*-1  
44: 987.08 cm\*\*-1  
45: 991.89 cm\*\*-1  
46: 1050.71 cm\*\*-1  
47: 1056.04 cm\*\*-1  
48: 1065.43 cm\*\*-1  
49: 1082.54 cm\*\*-1  
50: 1134.87 cm\*\*-1  
51: 1152.28 cm\*\*-1  
52: 1170.47 cm\*\*-1  
53: 1177.72 cm\*\*-1  
54: 1188.63 cm\*\*-1  
55: 1193.77 cm\*\*-1  
56: 1228.76 cm\*\*-1  
57: 1244.23 cm\*\*-1  
58: 1275.96 cm\*\*-1  
59: 1317.04 cm\*\*-1  
60: 1357.78 cm\*\*-1  
61: 1374.82 cm\*\*-1  
62: 1399.57 cm\*\*-1  
63: 1405.11 cm\*\*-1  
64: 1467.44 cm\*\*-1  
65: 1477.43 cm\*\*-1  
66: 1494.13 cm\*\*-1  
67: 1500.43 cm\*\*-1  
68: 1559.20 cm\*\*-1  
69: 1607.17 cm\*\*-1  
70: 1620.74 cm\*\*-1  
71: 1631.62 cm\*\*-1  
72: 1642.20 cm\*\*-1  
73: 1671.31 cm\*\*-1  
74: 3176.76 cm\*\*-1  
75: 3184.38 cm\*\*-1  
76: 3184.78 cm\*\*-1  
77: 3188.43 cm\*\*-1  
78: 3194.66 cm\*\*-1

79: 3203.20 cm\*\*-1  
80: 3204.45 cm\*\*-1  
81: 3208.90 cm\*\*-1  
82: 3240.56 cm\*\*-1  
83: 3272.98 cm\*\*-1

|                              |                        |
|------------------------------|------------------------|
| Electronic energy            | -1088.61365334 hartree |
| Total thermal correction     | 0.01228467 hartree     |
| Non-thermal (ZPE) correction | 0.21133799 hartree     |
| Total thermal energy         | -1088.39003067 hartree |
| Total Enthalpy               | -1088.38908646 hartree |
| Final Gibbs free enthalpy    | -1088.43980394 hartree |

Energy Calculations at above geometry

T<sub>2</sub>

|                     |                            |
|---------------------|----------------------------|
| TD-B3LYP/6-31G(d,p) | -1088.496855603492 hartree |
|---------------------|----------------------------|

Benzo[b]naphtho[1,2,d]thiophene S-oxide (1) S<sub>1</sub> state

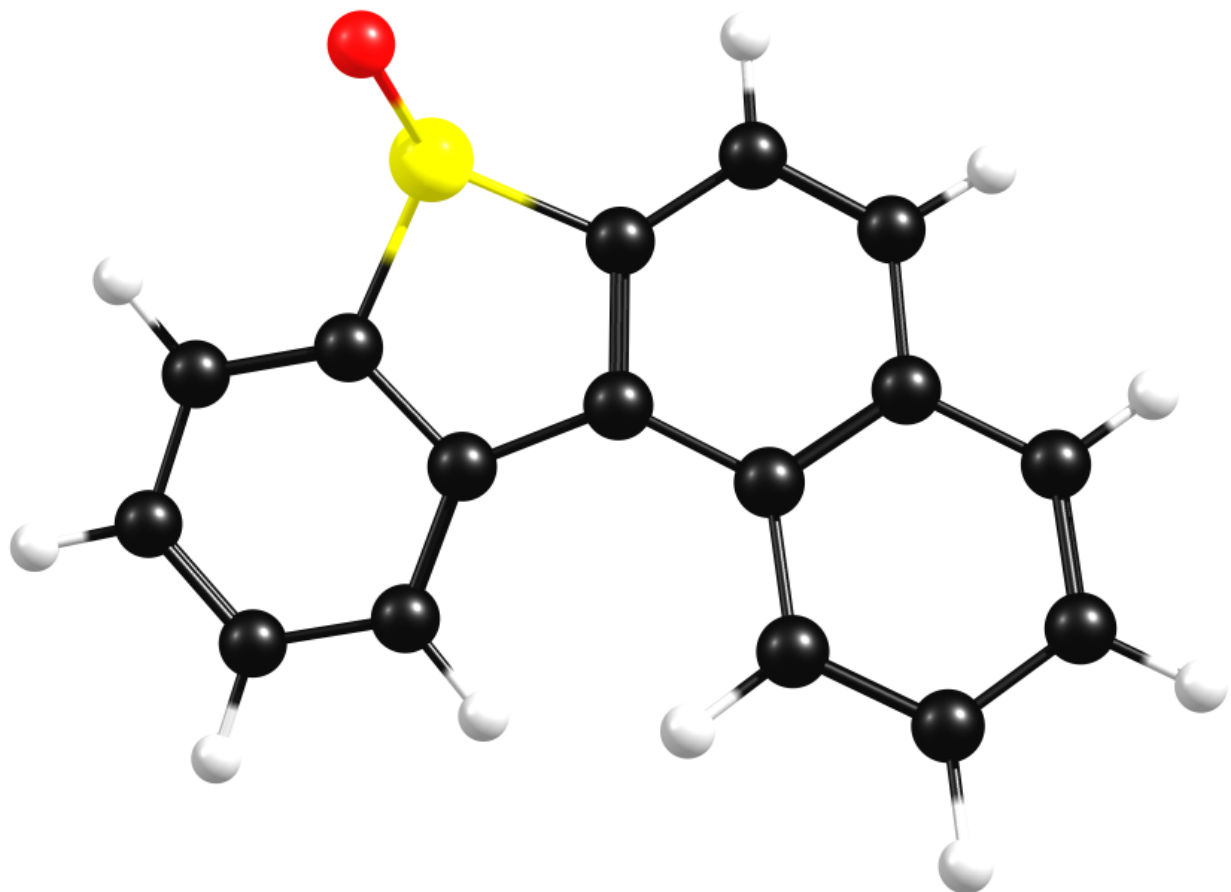

TD-B3LYP/6-31G(d,p) optimization and Hessian

Coordinates

|   |           |           |           |
|---|-----------|-----------|-----------|
| S | 1.809990  | -1.708349 | 0.026990  |
| C | 1.231939  | 2.193216  | -0.099752 |
| C | 1.020672  | 0.796006  | -0.068973 |
| C | 2.517026  | 2.719183  | -0.184821 |
| H | 2.637517  | 3.798766  | -0.221954 |
| C | 2.213752  | 0.003190  | -0.127507 |
| C | 3.659792  | 1.899287  | -0.233512 |
| H | 4.650156  | 2.336148  | -0.304517 |
| C | 3.503628  | 0.514978  | -0.198725 |
| H | 4.364649  | -0.146385 | -0.227573 |
| H | 0.390105  | 2.872786  | -0.096857 |
| O | 2.171981  | -2.209015 | 1.463505  |
| C | -0.182994 | -0.004640 | -0.059263 |
| C | 0.107657  | -1.397660 | -0.228480 |
| C | -0.860531 | -2.393472 | -0.414980 |

|   |           |           |           |
|---|-----------|-----------|-----------|
| C | -2.183782 | -2.015973 | -0.442646 |
| C | -2.568403 | -0.656612 | -0.189636 |
| C | -1.571650 | 0.361183  | 0.048248  |
| C | -2.024665 | 1.661671  | 0.385130  |
| C | -3.375180 | 1.973431  | 0.422850  |
| C | -4.340059 | 0.993205  | 0.140491  |
| C | -3.935258 | -0.300014 | -0.149053 |
| H | -0.571513 | -3.432450 | -0.545678 |
| H | -2.960187 | -2.751306 | -0.629568 |
| H | -4.675331 | -1.072560 | -0.343487 |
| H | -5.397018 | 1.243374  | 0.164504  |
| H | -3.685055 | 2.981824  | 0.682779  |
| H | -1.307031 | 2.424608  | 0.655706  |

### Frequencies

|     |        |        |
|-----|--------|--------|
| 0:  | 0.00   | cm**-1 |
| 1:  | 0.00   | cm**-1 |
| 2:  | 0.00   | cm**-1 |
| 3:  | 0.00   | cm**-1 |
| 4:  | 0.00   | cm**-1 |
| 5:  | 0.00   | cm**-1 |
| 6:  | 64.32  | cm**-1 |
| 7:  | 73.04  | cm**-1 |
| 8:  | 116.02 | cm**-1 |
| 9:  | 143.11 | cm**-1 |
| 10: | 167.32 | cm**-1 |
| 11: | 184.58 | cm**-1 |
| 12: | 218.20 | cm**-1 |
| 13: | 276.76 | cm**-1 |
| 14: | 286.33 | cm**-1 |
| 15: | 319.62 | cm**-1 |
| 16: | 361.34 | cm**-1 |
| 17: | 401.86 | cm**-1 |
| 18: | 414.34 | cm**-1 |
| 19: | 421.16 | cm**-1 |
| 20: | 476.21 | cm**-1 |
| 21: | 487.20 | cm**-1 |
| 22: | 511.16 | cm**-1 |
| 23: | 515.29 | cm**-1 |
| 24: | 535.88 | cm**-1 |
| 25: | 563.50 | cm**-1 |
| 26: | 618.27 | cm**-1 |
| 27: | 624.76 | cm**-1 |
| 28: | 646.32 | cm**-1 |
| 29: | 697.55 | cm**-1 |
| 30: | 705.58 | cm**-1 |
| 31: | 722.86 | cm**-1 |

|     |         |        |
|-----|---------|--------|
| 32: | 734.54  | cm**-1 |
| 33: | 741.27  | cm**-1 |
| 34: | 770.43  | cm**-1 |
| 35: | 789.10  | cm**-1 |
| 36: | 793.52  | cm**-1 |
| 37: | 834.04  | cm**-1 |
| 38: | 847.72  | cm**-1 |
| 39: | 871.65  | cm**-1 |
| 40: | 889.81  | cm**-1 |
| 41: | 925.27  | cm**-1 |
| 42: | 929.92  | cm**-1 |
| 43: | 938.37  | cm**-1 |
| 44: | 964.89  | cm**-1 |
| 45: | 970.08  | cm**-1 |
| 46: | 975.62  | cm**-1 |
| 47: | 1039.14 | cm**-1 |
| 48: | 1049.45 | cm**-1 |
| 49: | 1066.34 | cm**-1 |
| 50: | 1116.28 | cm**-1 |
| 51: | 1150.95 | cm**-1 |
| 52: | 1154.45 | cm**-1 |
| 53: | 1172.81 | cm**-1 |
| 54: | 1182.93 | cm**-1 |
| 55: | 1187.62 | cm**-1 |
| 56: | 1227.69 | cm**-1 |
| 57: | 1248.64 | cm**-1 |
| 58: | 1275.40 | cm**-1 |
| 59: | 1321.31 | cm**-1 |
| 60: | 1353.36 | cm**-1 |
| 61: | 1361.70 | cm**-1 |
| 62: | 1380.42 | cm**-1 |
| 63: | 1401.70 | cm**-1 |
| 64: | 1459.57 | cm**-1 |
| 65: | 1473.05 | cm**-1 |
| 66: | 1479.31 | cm**-1 |
| 67: | 1498.52 | cm**-1 |
| 68: | 1534.67 | cm**-1 |
| 69: | 1565.93 | cm**-1 |
| 70: | 1578.24 | cm**-1 |
| 71: | 1593.95 | cm**-1 |
| 72: | 1613.47 | cm**-1 |
| 73: | 1643.03 | cm**-1 |
| 74: | 3173.81 | cm**-1 |
| 75: | 3184.28 | cm**-1 |
| 76: | 3185.85 | cm**-1 |
| 77: | 3187.90 | cm**-1 |
| 78: | 3195.92 | cm**-1 |
| 79: | 3201.93 | cm**-1 |

80: 3203.89 cm\*\*-1  
81: 3217.36 cm\*\*-1  
82: 3233.29 cm\*\*-1  
83: 3253.78 cm\*\*-1

|                              |                        |
|------------------------------|------------------------|
| Electronic energy            | -1088.50769084 hartree |
| Total thermal correction     | 0.01338923 hartree     |
| Non-thermal (ZPE) correction | 0.20890055 hartree     |
| Total thermal energy         | -1088.28540105 hartree |
| Total Enthalpy               | -1088.28445684 hartree |
| Final Gibbs free enthalpy    | -1088.33761622 hartree |

Energy Calculations at above geometry

T<sub>2</sub>

|                     |                            |
|---------------------|----------------------------|
| TD-B3LYP/6-31G(d,p) | -1088.504088267631 hartree |
|---------------------|----------------------------|

Benzo[b]naphtho[1,2,d]thiophene S-oxide (1) T<sub>1</sub> state

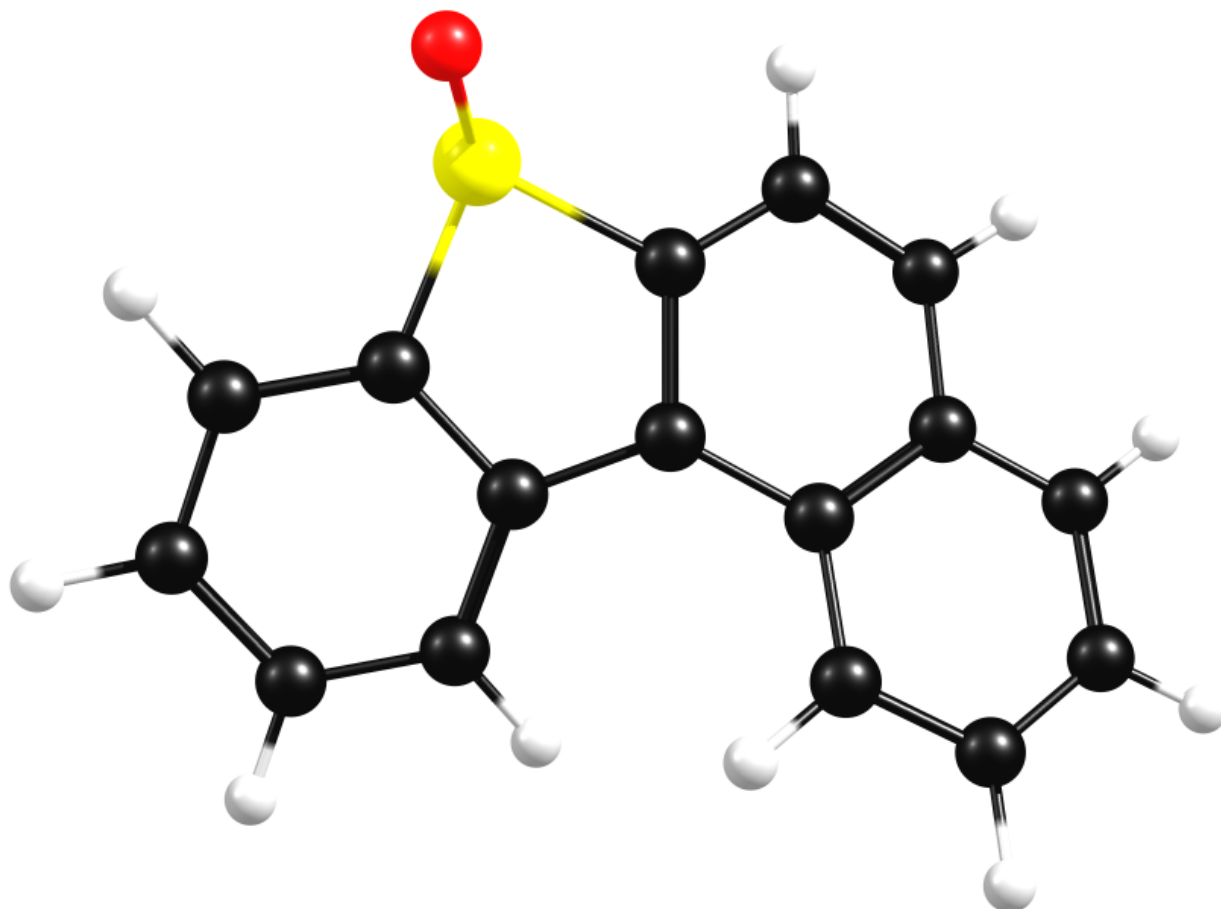

B3LYP/6-31G(d,p) optimization and Hessian

Coordinates

|   |           |           |           |
|---|-----------|-----------|-----------|
| S | 1.905537  | -1.822673 | 0.030657  |
| C | 1.187042  | 2.184565  | -0.202323 |
| C | 1.012115  | 0.772344  | -0.088063 |
| C | 2.459563  | 2.723328  | -0.258478 |
| H | 2.577574  | 3.799528  | -0.353110 |
| C | 2.200531  | -0.036638 | -0.091867 |
| C | 3.607878  | 1.904722  | -0.213908 |
| H | 4.595902  | 2.353019  | -0.254218 |
| C | 3.469795  | 0.513680  | -0.138796 |
| H | 4.346702  | -0.127665 | -0.116330 |
| H | 0.327717  | 2.838004  | -0.287348 |
| O | 2.225144  | -2.309331 | 1.430580  |
| C | -0.170982 | -0.002276 | -0.028420 |
| C | 0.150974  | -1.440296 | -0.156823 |
| C | -0.811298 | -2.377464 | -0.407895 |



|   |           |           |           |
|---|-----------|-----------|-----------|
| C | -2.164497 | -1.976316 | -0.485265 |
| C | -2.562713 | -0.619301 | -0.211596 |
| C | -1.569850 | 0.384405  | 0.074145  |
| C | -2.010125 | 1.656911  | 0.457308  |
| C | -3.380874 | 1.985284  | 0.488871  |
| C | -4.331167 | 1.034089  | 0.156190  |
| C | -3.918505 | -0.266632 | -0.182863 |
| H | -0.546891 | -3.423473 | -0.540505 |
| H | -2.936569 | -2.709885 | -0.697431 |
| H | -4.661594 | -1.023556 | -0.420897 |
| H | -5.388904 | 1.280319  | 0.169432  |
| H | -3.681744 | 2.986907  | 0.781147  |
| H | -1.290555 | 2.402824  | 0.771026  |

### Frequencies

|     |        |                    |
|-----|--------|--------------------|
| 0:  | 0.00   | cm** <sup>-1</sup> |
| 1:  | 0.00   | cm** <sup>-1</sup> |
| 2:  | 0.00   | cm** <sup>-1</sup> |
| 3:  | 0.00   | cm** <sup>-1</sup> |
| 4:  | 0.00   | cm** <sup>-1</sup> |
| 5:  | 0.00   | cm** <sup>-1</sup> |
| 6:  | 50.37  | cm** <sup>-1</sup> |
| 7:  | 79.72  | cm** <sup>-1</sup> |
| 8:  | 105.98 | cm** <sup>-1</sup> |
| 9:  | 141.80 | cm** <sup>-1</sup> |
| 10: | 159.49 | cm** <sup>-1</sup> |
| 11: | 183.72 | cm** <sup>-1</sup> |
| 12: | 214.29 | cm** <sup>-1</sup> |
| 13: | 274.29 | cm** <sup>-1</sup> |
| 14: | 313.96 | cm** <sup>-1</sup> |
| 15: | 329.56 | cm** <sup>-1</sup> |
| 16: | 368.77 | cm** <sup>-1</sup> |
| 17: | 380.05 | cm** <sup>-1</sup> |
| 18: | 403.09 | cm** <sup>-1</sup> |
| 19: | 442.50 | cm** <sup>-1</sup> |
| 20: | 463.67 | cm** <sup>-1</sup> |
| 21: | 478.01 | cm** <sup>-1</sup> |
| 22: | 509.30 | cm** <sup>-1</sup> |
| 23: | 524.51 | cm** <sup>-1</sup> |
| 24: | 531.02 | cm** <sup>-1</sup> |
| 25: | 542.39 | cm** <sup>-1</sup> |
| 26: | 620.29 | cm** <sup>-1</sup> |
| 27: | 620.57 | cm** <sup>-1</sup> |
| 28: | 638.53 | cm** <sup>-1</sup> |
| 29: | 684.57 | cm** <sup>-1</sup> |
| 30: | 713.12 | cm** <sup>-1</sup> |
| 31: | 722.66 | cm** <sup>-1</sup> |

32: 727.99 cm\*\*-1  
33: 757.37 cm\*\*-1  
34: 768.67 cm\*\*-1  
35: 777.88 cm\*\*-1  
36: 824.42 cm\*\*-1  
37: 862.15 cm\*\*-1  
38: 880.70 cm\*\*-1  
39: 885.78 cm\*\*-1  
40: 917.36 cm\*\*-1  
41: 935.05 cm\*\*-1  
42: 948.34 cm\*\*-1  
43: 961.42 cm\*\*-1  
44: 977.44 cm\*\*-1  
45: 981.99 cm\*\*-1  
46: 1029.47 cm\*\*-1  
47: 1045.21 cm\*\*-1  
48: 1046.27 cm\*\*-1  
49: 1058.44 cm\*\*-1  
50: 1071.66 cm\*\*-1  
51: 1116.04 cm\*\*-1  
52: 1130.33 cm\*\*-1  
53: 1145.32 cm\*\*-1  
54: 1178.13 cm\*\*-1  
55: 1187.17 cm\*\*-1  
56: 1217.87 cm\*\*-1  
57: 1233.40 cm\*\*-1  
58: 1274.15 cm\*\*-1  
59: 1302.60 cm\*\*-1  
60: 1315.40 cm\*\*-1  
61: 1355.34 cm\*\*-1  
62: 1374.10 cm\*\*-1  
63: 1399.28 cm\*\*-1  
64: 1427.07 cm\*\*-1  
65: 1453.96 cm\*\*-1  
66: 1463.62 cm\*\*-1  
67: 1483.33 cm\*\*-1  
68: 1509.47 cm\*\*-1  
69: 1554.66 cm\*\*-1  
70: 1572.16 cm\*\*-1  
71: 1586.99 cm\*\*-1  
72: 1602.98 cm\*\*-1  
73: 1624.09 cm\*\*-1  
74: 3179.44 cm\*\*-1  
75: 3184.48 cm\*\*-1  
76: 3185.39 cm\*\*-1  
77: 3191.17 cm\*\*-1  
78: 3191.79 cm\*\*-1  
79: 3200.74 cm\*\*-1

80: 3207.42 cm\*\*-1  
81: 3209.18 cm\*\*-1  
82: 3221.94 cm\*\*-1  
83: 3237.61 cm\*\*-1

|                              |                        |
|------------------------------|------------------------|
| Electronic energy            | -1088.53196884 hartree |
| Total thermal correction     | 0.01341380 hartree     |
| Non-thermal (ZPE) correction | 0.20838499 hartree     |
| Total thermal energy         | -1088.31017006 hartree |
| Total Enthalpy               | -1088.30922585 hartree |
| Final Gibbs free enthalpy    | -1088.36367402 hartree |

Energy Calculations at above geometry

T<sub>2</sub>

|                     |                            |
|---------------------|----------------------------|
| TD-B3LYP/6-31G(d,p) | -1088.497532967727 hartree |
|---------------------|----------------------------|

Benzo[b]naphtho[2,1,d]thiophene S-oxide (2) S<sub>0</sub> state

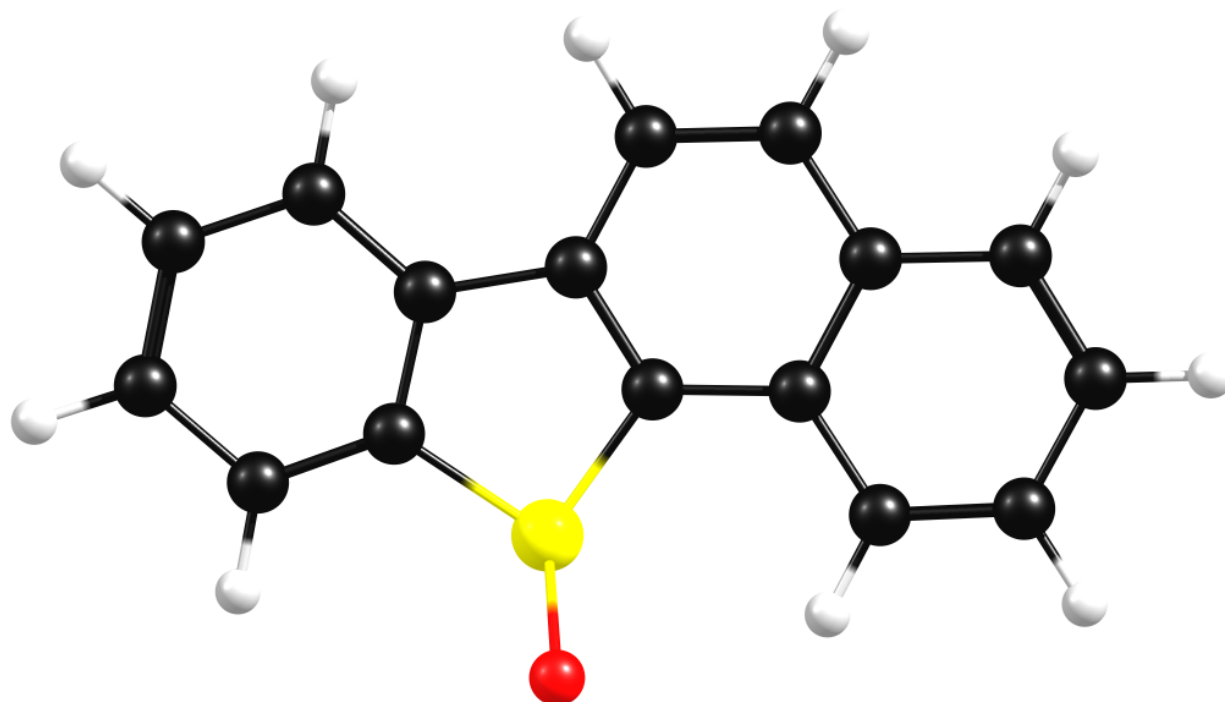

B3LYP/6-31G(d,p) optimization and Hessian

Coordinates

|   |           |           |           |
|---|-----------|-----------|-----------|
| C | -4.193226 | 1.233251  | 0.097503  |
| C | -4.477574 | -0.135427 | 0.040767  |
| C | -3.440411 | -1.067075 | -0.078409 |
| C | -2.875222 | 1.696815  | 0.056928  |
| C | -2.136141 | -0.594668 | -0.110805 |
| C | -1.828545 | 0.774165  | -0.032925 |
| H | -5.007945 | 1.947016  | 0.179591  |
| H | -5.507320 | -0.477409 | 0.087458  |
| H | -3.647213 | -2.132241 | -0.130227 |
| H | -2.671702 | 2.763020  | 0.107457  |
| S | -0.665952 | -1.620473 | -0.385230 |
| C | 0.364986  | -0.154200 | -0.086336 |
| C | -0.378339 | 1.017313  | -0.033055 |
| C | 1.664697  | 2.299206  | 0.050385  |
| C | 1.781609  | -0.165761 | -0.050904 |
| C | 2.443992  | 1.107671  | 0.019898  |
| C | 0.289423  | 2.266155  | 0.027557  |
| H | -0.281618 | 3.189355  | 0.059021  |
| H | 2.183423  | 3.253504  | 0.097648  |
| C | 3.863108  | 1.138372  | 0.058077  |
| H | 4.363249  | 2.102278  | 0.110701  |

|   |           |           |           |
|---|-----------|-----------|-----------|
| C | 3.937670  | -1.281590 | -0.026072 |
| H | 4.525990  | -2.194688 | -0.032767 |
| C | 2.562809  | -1.353975 | -0.063464 |
| H | 2.061317  | -2.316596 | -0.071835 |
| C | 4.594776  | -0.028110 | 0.031342  |
| H | 5.680323  | 0.008624  | 0.061212  |
| O | -0.498983 | -2.701853 | 0.662455  |

### Frequencies

|     |        |                    |
|-----|--------|--------------------|
| 0:  | 0.00   | cm** <sup>-1</sup> |
| 1:  | 0.00   | cm** <sup>-1</sup> |
| 2:  | 0.00   | cm** <sup>-1</sup> |
| 3:  | 0.00   | cm** <sup>-1</sup> |
| 4:  | 0.00   | cm** <sup>-1</sup> |
| 5:  | 0.00   | cm** <sup>-1</sup> |
| 6:  | 53.01  | cm** <sup>-1</sup> |
| 7:  | 91.27  | cm** <sup>-1</sup> |
| 8:  | 113.01 | cm** <sup>-1</sup> |
| 9:  | 139.43 | cm** <sup>-1</sup> |
| 10: | 156.72 | cm** <sup>-1</sup> |
| 11: | 183.96 | cm** <sup>-1</sup> |
| 12: | 211.43 | cm** <sup>-1</sup> |
| 13: | 280.80 | cm** <sup>-1</sup> |
| 14: | 314.88 | cm** <sup>-1</sup> |
| 15: | 339.36 | cm** <sup>-1</sup> |
| 16: | 373.43 | cm** <sup>-1</sup> |
| 17: | 403.72 | cm** <sup>-1</sup> |
| 18: | 431.39 | cm** <sup>-1</sup> |
| 19: | 454.55 | cm** <sup>-1</sup> |
| 20: | 469.19 | cm** <sup>-1</sup> |
| 21: | 513.38 | cm** <sup>-1</sup> |
| 22: | 525.62 | cm** <sup>-1</sup> |
| 23: | 539.83 | cm** <sup>-1</sup> |
| 24: | 556.96 | cm** <sup>-1</sup> |
| 25: | 580.58 | cm** <sup>-1</sup> |
| 26: | 590.08 | cm** <sup>-1</sup> |
| 27: | 669.90 | cm** <sup>-1</sup> |
| 28: | 681.52 | cm** <sup>-1</sup> |
| 29: | 687.94 | cm** <sup>-1</sup> |
| 30: | 726.00 | cm** <sup>-1</sup> |
| 31: | 742.32 | cm** <sup>-1</sup> |
| 32: | 761.26 | cm** <sup>-1</sup> |
| 33: | 774.14 | cm** <sup>-1</sup> |
| 34: | 794.20 | cm** <sup>-1</sup> |
| 35: | 829.53 | cm** <sup>-1</sup> |
| 36: | 834.38 | cm** <sup>-1</sup> |
| 37: | 878.13 | cm** <sup>-1</sup> |

38: 888.09 cm\*\*-1  
39: 890.32 cm\*\*-1  
40: 946.33 cm\*\*-1  
41: 958.37 cm\*\*-1  
42: 970.75 cm\*\*-1  
43: 981.57 cm\*\*-1  
44: 988.38 cm\*\*-1  
45: 999.59 cm\*\*-1  
46: 1045.12 cm\*\*-1  
47: 1048.42 cm\*\*-1  
48: 1055.03 cm\*\*-1  
49: 1075.10 cm\*\*-1  
50: 1103.26 cm\*\*-1  
51: 1151.63 cm\*\*-1  
52: 1161.69 cm\*\*-1  
53: 1177.27 cm\*\*-1  
54: 1188.86 cm\*\*-1  
55: 1192.14 cm\*\*-1  
56: 1244.37 cm\*\*-1  
57: 1276.34 cm\*\*-1  
58: 1289.90 cm\*\*-1  
59: 1325.43 cm\*\*-1  
60: 1361.79 cm\*\*-1  
61: 1382.10 cm\*\*-1  
62: 1393.55 cm\*\*-1  
63: 1413.59 cm\*\*-1  
64: 1465.24 cm\*\*-1  
65: 1485.62 cm\*\*-1  
66: 1494.42 cm\*\*-1  
67: 1510.71 cm\*\*-1  
68: 1559.63 cm\*\*-1  
69: 1606.57 cm\*\*-1  
70: 1625.09 cm\*\*-1  
71: 1640.73 cm\*\*-1  
72: 1643.29 cm\*\*-1  
73: 1673.10 cm\*\*-1  
74: 3175.75 cm\*\*-1  
75: 3179.36 cm\*\*-1  
76: 3183.01 cm\*\*-1  
77: 3189.22 cm\*\*-1  
78: 3191.13 cm\*\*-1  
79: 3199.24 cm\*\*-1  
80: 3200.09 cm\*\*-1  
81: 3200.90 cm\*\*-1  
82: 3209.82 cm\*\*-1  
83: 3212.06 cm\*\*-1

Electronic energy

-1088.62052781 hartree

|                              |                        |
|------------------------------|------------------------|
| Total thermal correction     | 0.01306264 hartree     |
| Non-thermal (ZPE) correction | 0.21154128 hartree     |
| Total thermal energy         | -1088.39592389 hartree |
| Total Enthalpy               | -1088.39497968 hartree |
| Final Gibbs free enthalpy    | -1088.44764842 hartree |

Energy Calculations at above geometry

T<sub>2</sub>

|                     |                            |
|---------------------|----------------------------|
| TD-B3LYP/6-31G(d,p) | -1088.499372291350 hartree |
|---------------------|----------------------------|

Benzo[b]naphtho[2,1,d]thiophene S-oxide (2) S<sub>1</sub> state

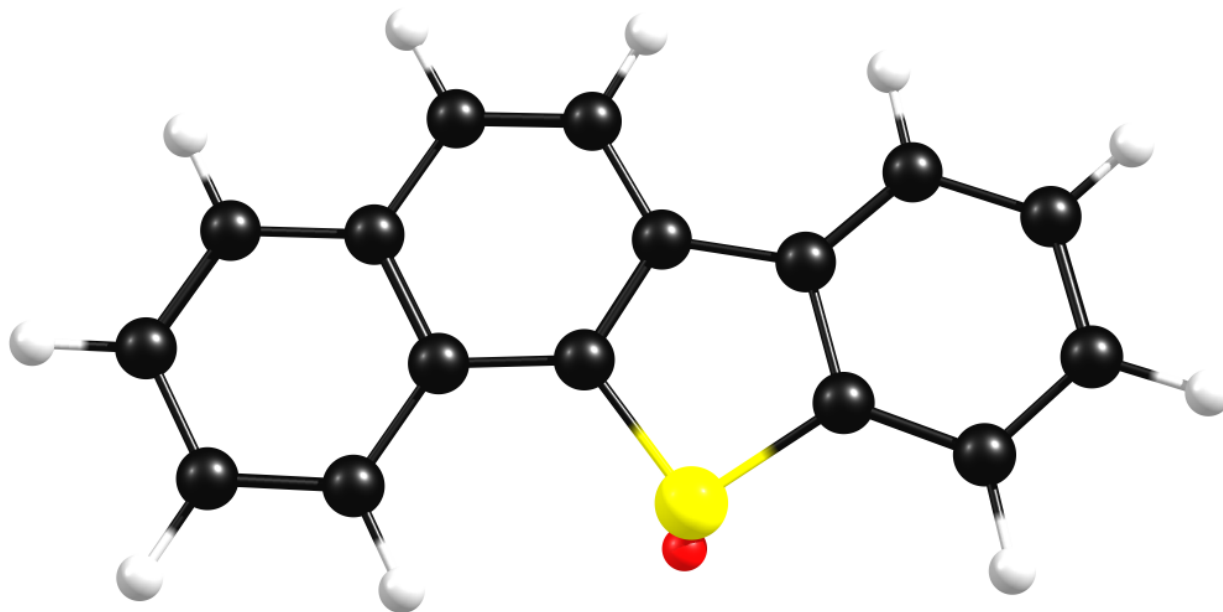

B3LYP/6-31G(d,p) optimization and Hessian

Coordinates

|   |           |           |           |
|---|-----------|-----------|-----------|
| C | -4.203711 | 1.202870  | -0.048614 |
| C | -4.477163 | -0.170875 | -0.212732 |
| C | -3.430047 | -1.090865 | -0.213683 |
| C | -2.903903 | 1.677446  | 0.092864  |
| C | -2.134243 | -0.600477 | -0.083220 |
| C | -1.818402 | 0.782807  | 0.062422  |
| H | -5.029214 | 1.908888  | -0.031998 |
| H | -5.499311 | -0.513859 | -0.334018 |
| H | -3.620923 | -2.155378 | -0.313587 |
| H | -2.724090 | 2.741225  | 0.222107  |
| S | -0.668030 | -1.572957 | 0.120661  |
| C | 0.374442  | -0.171137 | 0.004197  |
| C | -0.400094 | 1.023384  | 0.127869  |
| C | 1.671473  | 2.270954  | 0.166707  |
| C | 1.796692  | -0.202296 | -0.033615 |
| C | 2.457363  | 1.076699  | 0.031482  |
| C | 0.294616  | 2.246883  | 0.216488  |
| H | -0.262669 | 3.175985  | 0.301962  |
| H | 2.196126  | 3.220713  | 0.226990  |
| C | 3.866096  | 1.116787  | -0.036935 |
| H | 4.359329  | 2.084709  | 0.011933  |
| C | 3.970672  | -1.289470 | -0.205897 |
| H | 4.555737  | -2.201141 | -0.289625 |



|   |           |           |           |
|---|-----------|-----------|-----------|
| C | 2.587447  | -1.370095 | -0.140313 |
| H | 2.106813  | -2.344671 | -0.169370 |
| C | 4.617957  | -0.043559 | -0.157666 |
| H | 5.701682  | 0.010457  | -0.207811 |
| O | -0.677465 | -2.240349 | 1.539369  |

## Frequencies

|     |        |                    |
|-----|--------|--------------------|
| 0:  | 0.00   | cm** <sup>-1</sup> |
| 1:  | 0.00   | cm** <sup>-1</sup> |
| 2:  | 0.00   | cm** <sup>-1</sup> |
| 3:  | 0.00   | cm** <sup>-1</sup> |
| 4:  | 0.00   | cm** <sup>-1</sup> |
| 5:  | 0.00   | cm** <sup>-1</sup> |
| 6:  | 51.38  | cm** <sup>-1</sup> |
| 7:  | 84.23  | cm** <sup>-1</sup> |
| 8:  | 125.38 | cm** <sup>-1</sup> |
| 9:  | 134.58 | cm** <sup>-1</sup> |
| 10: | 151.17 | cm** <sup>-1</sup> |
| 11: | 180.51 | cm** <sup>-1</sup> |
| 12: | 208.68 | cm** <sup>-1</sup> |
| 13: | 269.13 | cm** <sup>-1</sup> |
| 14: | 285.46 | cm** <sup>-1</sup> |
| 15: | 306.89 | cm** <sup>-1</sup> |
| 16: | 374.73 | cm** <sup>-1</sup> |
| 17: | 390.14 | cm** <sup>-1</sup> |
| 18: | 415.28 | cm** <sup>-1</sup> |
| 19: | 421.42 | cm** <sup>-1</sup> |
| 20: | 479.48 | cm** <sup>-1</sup> |
| 21: | 501.01 | cm** <sup>-1</sup> |
| 22: | 507.79 | cm** <sup>-1</sup> |
| 23: | 512.78 | cm** <sup>-1</sup> |
| 24: | 548.96 | cm** <sup>-1</sup> |
| 25: | 551.70 | cm** <sup>-1</sup> |
| 26: | 587.57 | cm** <sup>-1</sup> |
| 27: | 623.34 | cm** <sup>-1</sup> |
| 28: | 676.15 | cm** <sup>-1</sup> |
| 29: | 690.38 | cm** <sup>-1</sup> |
| 30: | 700.54 | cm** <sup>-1</sup> |
| 31: | 730.05 | cm** <sup>-1</sup> |
| 32: | 741.40 | cm** <sup>-1</sup> |
| 33: | 747.13 | cm** <sup>-1</sup> |
| 34: | 763.31 | cm** <sup>-1</sup> |
| 35: | 779.06 | cm** <sup>-1</sup> |
| 36: | 805.03 | cm** <sup>-1</sup> |
| 37: | 833.76 | cm** <sup>-1</sup> |
| 38: | 851.69 | cm** <sup>-1</sup> |
| 39: | 854.30 | cm** <sup>-1</sup> |

40: 891.61 cm\*\*-1  
41: 922.23 cm\*\*-1  
42: 931.48 cm\*\*-1  
43: 941.44 cm\*\*-1  
44: 965.28 cm\*\*-1  
45: 967.78 cm\*\*-1  
46: 969.97 cm\*\*-1  
47: 1035.78 cm\*\*-1  
48: 1047.74 cm\*\*-1  
49: 1057.05 cm\*\*-1  
50: 1083.51 cm\*\*-1  
51: 1148.14 cm\*\*-1  
52: 1153.93 cm\*\*-1  
53: 1165.57 cm\*\*-1  
54: 1185.78 cm\*\*-1  
55: 1189.04 cm\*\*-1  
56: 1243.98 cm\*\*-1  
57: 1260.62 cm\*\*-1  
58: 1285.76 cm\*\*-1  
59: 1332.97 cm\*\*-1  
60: 1345.39 cm\*\*-1  
61: 1359.68 cm\*\*-1  
62: 1387.62 cm\*\*-1  
63: 1410.13 cm\*\*-1  
64: 1461.48 cm\*\*-1  
65: 1474.28 cm\*\*-1  
66: 1481.21 cm\*\*-1  
67: 1510.57 cm\*\*-1  
68: 1530.68 cm\*\*-1  
69: 1565.10 cm\*\*-1  
70: 1584.87 cm\*\*-1  
71: 1592.20 cm\*\*-1  
72: 1615.16 cm\*\*-1  
73: 1640.26 cm\*\*-1  
74: 3172.19 cm\*\*-1  
75: 3175.13 cm\*\*-1  
76: 3178.09 cm\*\*-1  
77: 3184.33 cm\*\*-1  
78: 3190.81 cm\*\*-1  
79: 3194.40 cm\*\*-1  
80: 3196.49 cm\*\*-1  
81: 3201.13 cm\*\*-1  
82: 3204.68 cm\*\*-1  
83: 3216.89 cm\*\*-1

|                              |                        |
|------------------------------|------------------------|
| Electronic energy            | -1088.51267005 hartree |
| Total thermal correction     | 0.01346315 hartree     |
| Non-thermal (ZPE) correction | 0.20853621 hartree     |

|                           |                        |
|---------------------------|------------------------|
| Total thermal energy      | -1088.29067069 hartree |
| Total Enthalpy            | -1088.28972648 hartree |
| Final Gibbs free enthalpy | -1088.34309351 hartree |

Energy Calculations at above geometry

T<sub>2</sub>

|                     |                            |
|---------------------|----------------------------|
| TD-B3LYP/6-31G(d,p) | -1088.504250500628 hartree |
|---------------------|----------------------------|

Benzo[b]naphtho[2,1,d]thiophene S-oxide (2) T<sub>1</sub> state

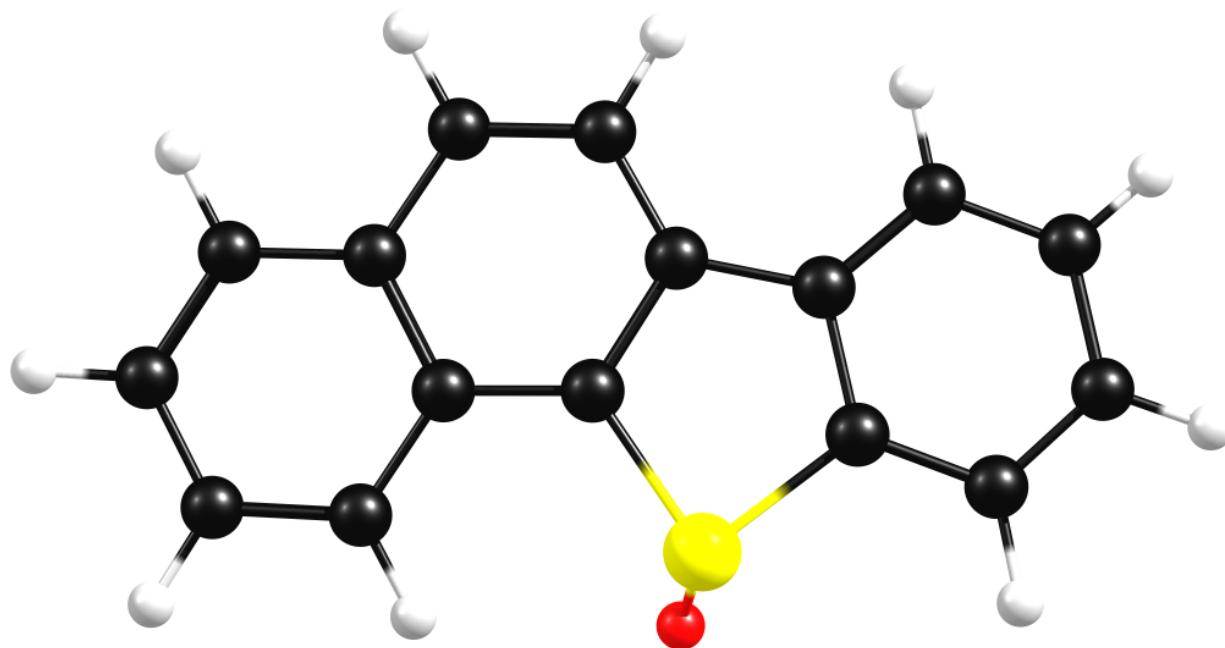

B3LYP/6-31G(d,p) optimization and Hessian

Coordinates

|   |           |           |           |
|---|-----------|-----------|-----------|
| C | -4.199947 | 1.228700  | 0.106841  |
| C | -4.463714 | -0.151500 | -0.010127 |
| C | -3.410669 | -1.062041 | -0.135924 |
| C | -2.901023 | 1.711816  | 0.105752  |
| C | -2.109747 | -0.578607 | -0.143589 |
| C | -1.817970 | 0.807450  | -0.015454 |
| H | -5.029598 | 1.922842  | 0.206220  |
| H | -5.489448 | -0.507827 | -0.004736 |
| H | -3.604197 | -2.127787 | -0.220487 |
| H | -2.712681 | 2.776306  | 0.215629  |
| S | -0.646965 | -1.640862 | -0.340210 |
| C | 0.369185  | -0.176862 | -0.122069 |
| C | -0.418176 | 1.077970  | -0.022827 |
| C | 1.655748  | 2.310072  | 0.041754  |
| C | 1.779400  | -0.183166 | -0.055046 |
| C | 2.449852  | 1.095916  | 0.001960  |
| C | 0.265482  | 2.290032  | 0.043198  |
| H | -0.284774 | 3.225729  | 0.094492  |
| H | 2.182219  | 3.258955  | 0.092197  |
| C | 3.837640  | 1.125407  | 0.021363  |
| H | 4.347208  | 2.085272  | 0.052800  |
| C | 3.967253  | -1.298025 | -0.024495 |
| H | 4.542861  | -2.218772 | -0.020277 |

|   |           |           |           |
|---|-----------|-----------|-----------|
| C | 2.560008  | -1.362960 | -0.040492 |
| H | 2.060785  | -2.326045 | -0.007593 |
| C | 4.605566  | -0.072482 | 0.000467  |
| H | 5.689915  | -0.012920 | 0.016417  |
| O | -0.517032 | -2.623931 | 0.810207  |

## Frequencies

|     |        |                    |
|-----|--------|--------------------|
| 0:  | 0.00   | cm** <sup>-1</sup> |
| 1:  | 0.00   | cm** <sup>-1</sup> |
| 2:  | 0.00   | cm** <sup>-1</sup> |
| 3:  | 0.00   | cm** <sup>-1</sup> |
| 4:  | 0.00   | cm** <sup>-1</sup> |
| 5:  | 0.00   | cm** <sup>-1</sup> |
| 6:  | 46.71  | cm** <sup>-1</sup> |
| 7:  | 90.30  | cm** <sup>-1</sup> |
| 8:  | 107.83 | cm** <sup>-1</sup> |
| 9:  | 138.98 | cm** <sup>-1</sup> |
| 10: | 151.48 | cm** <sup>-1</sup> |
| 11: | 177.15 | cm** <sup>-1</sup> |
| 12: | 207.94 | cm** <sup>-1</sup> |
| 13: | 271.25 | cm** <sup>-1</sup> |
| 14: | 296.84 | cm** <sup>-1</sup> |
| 15: | 316.32 | cm** <sup>-1</sup> |
| 16: | 359.12 | cm** <sup>-1</sup> |
| 17: | 380.41 | cm** <sup>-1</sup> |
| 18: | 413.36 | cm** <sup>-1</sup> |
| 19: | 430.97 | cm** <sup>-1</sup> |
| 20: | 461.47 | cm** <sup>-1</sup> |
| 21: | 488.86 | cm** <sup>-1</sup> |
| 22: | 513.74 | cm** <sup>-1</sup> |
| 23: | 517.96 | cm** <sup>-1</sup> |
| 24: | 530.03 | cm** <sup>-1</sup> |
| 25: | 542.39 | cm** <sup>-1</sup> |
| 26: | 580.64 | cm** <sup>-1</sup> |
| 27: | 611.46 | cm** <sup>-1</sup> |
| 28: | 649.78 | cm** <sup>-1</sup> |
| 29: | 678.66 | cm** <sup>-1</sup> |
| 30: | 717.15 | cm** <sup>-1</sup> |
| 31: | 727.62 | cm** <sup>-1</sup> |
| 32: | 735.90 | cm** <sup>-1</sup> |
| 33: | 755.73 | cm** <sup>-1</sup> |
| 34: | 769.08 | cm** <sup>-1</sup> |
| 35: | 781.25 | cm** <sup>-1</sup> |
| 36: | 810.81 | cm** <sup>-1</sup> |
| 37: | 866.46 | cm** <sup>-1</sup> |
| 38: | 873.11 | cm** <sup>-1</sup> |
| 39: | 883.76 | cm** <sup>-1</sup> |

40: 912.99 cm\*\*-1  
41: 924.01 cm\*\*-1  
42: 948.95 cm\*\*-1  
43: 958.40 cm\*\*-1  
44: 969.15 cm\*\*-1  
45: 982.22 cm\*\*-1  
46: 1006.89 cm\*\*-1  
47: 1021.82 cm\*\*-1  
48: 1039.30 cm\*\*-1  
49: 1056.08 cm\*\*-1  
50: 1073.55 cm\*\*-1  
51: 1084.55 cm\*\*-1  
52: 1111.95 cm\*\*-1  
53: 1145.33 cm\*\*-1  
54: 1167.67 cm\*\*-1  
55: 1186.59 cm\*\*-1  
56: 1207.94 cm\*\*-1  
57: 1233.49 cm\*\*-1  
58: 1280.86 cm\*\*-1  
59: 1296.74 cm\*\*-1  
60: 1317.08 cm\*\*-1  
61: 1363.29 cm\*\*-1  
62: 1383.69 cm\*\*-1  
63: 1403.13 cm\*\*-1  
64: 1441.50 cm\*\*-1  
65: 1451.23 cm\*\*-1  
66: 1475.05 cm\*\*-1  
67: 1490.60 cm\*\*-1  
68: 1498.86 cm\*\*-1  
69: 1524.29 cm\*\*-1  
70: 1565.14 cm\*\*-1  
71: 1584.16 cm\*\*-1  
72: 1596.15 cm\*\*-1  
73: 1623.67 cm\*\*-1  
74: 3178.93 cm\*\*-1  
75: 3181.59 cm\*\*-1  
76: 3183.65 cm\*\*-1  
77: 3191.79 cm\*\*-1  
78: 3192.37 cm\*\*-1  
79: 3198.65 cm\*\*-1  
80: 3200.14 cm\*\*-1  
81: 3204.94 cm\*\*-1  
82: 3210.62 cm\*\*-1  
83: 3214.58 cm\*\*-1

|                              |                        |
|------------------------------|------------------------|
| Electronic energy            | -1088.53329850 hartree |
| Total thermal correction     | 0.01352164 hartree     |
| Non-thermal (ZPE) correction | 0.20769622 hartree     |

|                           |                        |
|---------------------------|------------------------|
| Total thermal energy      | -1088.31208064 hartree |
| Total Enthalpy            | -1088.31113643 hartree |
| Final Gibbs free enthalpy | -1088.36574320 hartree |

Energy Calculations at above geometry

T<sub>2</sub>

|                     |                            |
|---------------------|----------------------------|
| TD-B3LYP/6-31G(d,p) | -1088.501832961141 hartree |
|---------------------|----------------------------|

Benzo[b]phenanthro[9,10,d]thiophene S-oxide (3) S<sub>0</sub> state

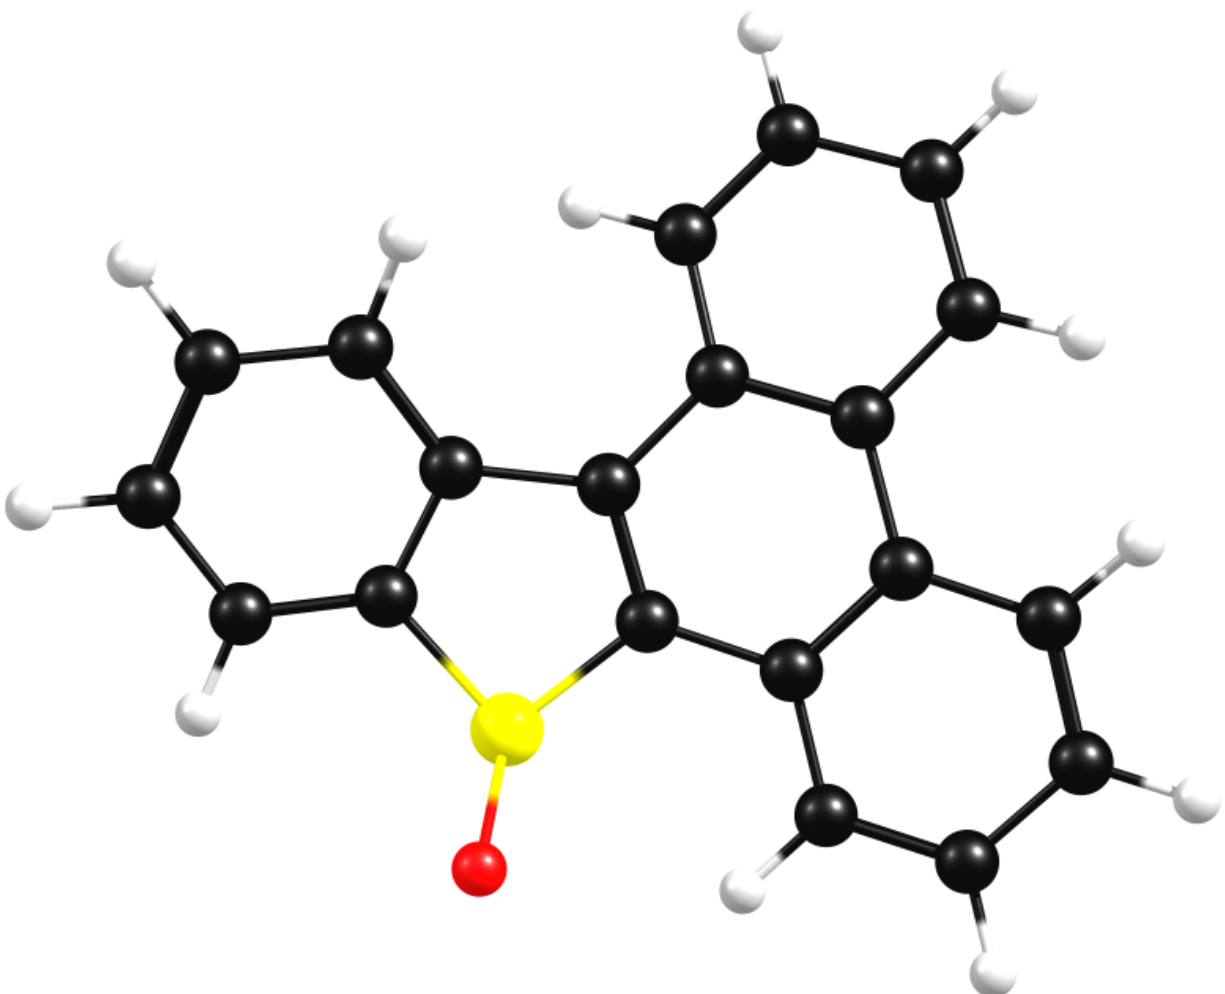

B3LYP/6-31G(d,p) optimization and Hessian

Coordinates

|   |           |           |           |
|---|-----------|-----------|-----------|
| S | -1.371354 | -1.945212 | -0.621445 |
| C | -4.718272 | 0.274205  | 0.155135  |
| C | -4.130452 | 1.521602  | 0.376090  |
| C | -3.912207 | -0.825589 | -0.154559 |
| H | -4.754751 | 2.371268  | 0.637530  |
| H | -4.338630 | -1.813393 | -0.303959 |
| C | -2.746177 | 1.700376  | 0.288785  |
| C | -2.542028 | -0.632685 | -0.233036 |
| H | -2.333815 | 2.672632  | 0.521759  |
| C | -1.918351 | 0.613264  | -0.031142 |
| H | -5.794118 | 0.153180  | 0.242058  |
| C | 1.706906  | -2.598597 | -0.108034 |



|   |           |           |           |
|---|-----------|-----------|-----------|
| C | 3.029188  | -2.968924 | 0.036126  |
| C | 1.338506  | -1.229826 | -0.096086 |
| C | 4.018581  | -1.983514 | 0.207530  |
| C | 2.335282  | -0.221881 | 0.068990  |
| C | 3.676272  | -0.643215 | 0.227914  |
| C | -0.024669 | -0.811925 | -0.184445 |
| C | -0.440816 | 0.499586  | -0.098688 |
| C | 0.559163  | 1.548405  | -0.079013 |
| C | 1.940612  | 1.183186  | 0.036607  |
| H | 0.932671  | -3.353962 | -0.191900 |
| H | 3.302453  | -4.020175 | 0.031095  |
| H | 5.057804  | -2.274436 | 0.332499  |
| H | 4.462821  | 0.088604  | 0.372701  |
| C | 0.230140  | 2.918405  | -0.224697 |
| C | 2.901756  | 2.220513  | 0.080908  |
| C | 2.545671  | 3.552648  | -0.016724 |
| C | 1.197663  | 3.904291  | -0.192814 |
| H | -0.795140 | 3.201286  | -0.416727 |
| H | 3.953131  | 1.973604  | 0.174563  |
| H | 3.311987  | 4.321675  | 0.017683  |
| H | 0.914228  | 4.945552  | -0.317205 |
| O | -1.532706 | -3.133314 | 0.305304  |

### Frequencies

|     |        |                    |
|-----|--------|--------------------|
| 0:  | 0.00   | cm** <sup>-1</sup> |
| 1:  | 0.00   | cm** <sup>-1</sup> |
| 2:  | 0.00   | cm** <sup>-1</sup> |
| 3:  | 0.00   | cm** <sup>-1</sup> |
| 4:  | 0.00   | cm** <sup>-1</sup> |
| 5:  | 0.00   | cm** <sup>-1</sup> |
| 6:  | 45.13  | cm** <sup>-1</sup> |
| 7:  | 70.43  | cm** <sup>-1</sup> |
| 8:  | 99.06  | cm** <sup>-1</sup> |
| 9:  | 108.84 | cm** <sup>-1</sup> |
| 10: | 117.90 | cm** <sup>-1</sup> |
| 11: | 151.50 | cm** <sup>-1</sup> |
| 12: | 172.88 | cm** <sup>-1</sup> |
| 13: | 220.42 | cm** <sup>-1</sup> |
| 14: | 235.90 | cm** <sup>-1</sup> |
| 15: | 260.92 | cm** <sup>-1</sup> |
| 16: | 282.91 | cm** <sup>-1</sup> |
| 17: | 323.11 | cm** <sup>-1</sup> |
| 18: | 333.25 | cm** <sup>-1</sup> |
| 19: | 390.10 | cm** <sup>-1</sup> |
| 20: | 407.09 | cm** <sup>-1</sup> |
| 21: | 418.60 | cm** <sup>-1</sup> |
| 22: | 441.17 | cm** <sup>-1</sup> |

|     |         |        |
|-----|---------|--------|
| 23: | 449.92  | cm**-1 |
| 24: | 456.74  | cm**-1 |
| 25: | 488.60  | cm**-1 |
| 26: | 511.25  | cm**-1 |
| 27: | 536.15  | cm**-1 |
| 28: | 572.73  | cm**-1 |
| 29: | 585.43  | cm**-1 |
| 30: | 612.55  | cm**-1 |
| 31: | 625.32  | cm**-1 |
| 32: | 640.78  | cm**-1 |
| 33: | 666.23  | cm**-1 |
| 34: | 685.69  | cm**-1 |
| 35: | 711.76  | cm**-1 |
| 36: | 740.24  | cm**-1 |
| 37: | 746.54  | cm**-1 |
| 38: | 761.54  | cm**-1 |
| 39: | 764.58  | cm**-1 |
| 40: | 774.23  | cm**-1 |
| 41: | 784.73  | cm**-1 |
| 42: | 802.20  | cm**-1 |
| 43: | 811.62  | cm**-1 |
| 44: | 875.65  | cm**-1 |
| 45: | 883.60  | cm**-1 |
| 46: | 884.33  | cm**-1 |
| 47: | 906.23  | cm**-1 |
| 48: | 948.70  | cm**-1 |
| 49: | 953.44  | cm**-1 |
| 50: | 963.17  | cm**-1 |
| 51: | 986.67  | cm**-1 |
| 52: | 989.33  | cm**-1 |
| 53: | 994.28  | cm**-1 |
| 54: | 998.44  | cm**-1 |
| 55: | 1016.63 | cm**-1 |
| 56: | 1053.40 | cm**-1 |
| 57: | 1059.44 | cm**-1 |
| 58: | 1073.90 | cm**-1 |
| 59: | 1079.91 | cm**-1 |
| 60: | 1082.38 | cm**-1 |
| 61: | 1129.94 | cm**-1 |
| 62: | 1157.90 | cm**-1 |
| 63: | 1167.57 | cm**-1 |
| 64: | 1187.14 | cm**-1 |
| 65: | 1192.45 | cm**-1 |
| 66: | 1199.28 | cm**-1 |
| 67: | 1206.01 | cm**-1 |
| 68: | 1265.98 | cm**-1 |
| 69: | 1271.15 | cm**-1 |
| 70: | 1295.86 | cm**-1 |

71: 1311.72 cm\*\*<sup>-1</sup>  
72: 1335.31 cm\*\*<sup>-1</sup>  
73: 1363.09 cm\*\*<sup>-1</sup>  
74: 1371.34 cm\*\*<sup>-1</sup>  
75: 1384.54 cm\*\*<sup>-1</sup>  
76: 1402.60 cm\*\*<sup>-1</sup>  
77: 1454.53 cm\*\*<sup>-1</sup>  
78: 1473.41 cm\*\*<sup>-1</sup>  
79: 1483.63 cm\*\*<sup>-1</sup>  
80: 1491.08 cm\*\*<sup>-1</sup>  
81: 1500.36 cm\*\*<sup>-1</sup>  
82: 1537.91 cm\*\*<sup>-1</sup>  
83: 1568.10 cm\*\*<sup>-1</sup>  
84: 1611.33 cm\*\*<sup>-1</sup>  
85: 1614.59 cm\*\*<sup>-1</sup>  
86: 1626.12 cm\*\*<sup>-1</sup>  
87: 1643.18 cm\*\*<sup>-1</sup>  
88: 1659.26 cm\*\*<sup>-1</sup>  
89: 1664.62 cm\*\*<sup>-1</sup>  
90: 3182.67 cm\*\*<sup>-1</sup>  
91: 3183.57 cm\*\*<sup>-1</sup>  
92: 3184.94 cm\*\*<sup>-1</sup>  
93: 3195.98 cm\*\*<sup>-1</sup>  
94: 3198.62 cm\*\*<sup>-1</sup>  
95: 3199.96 cm\*\*<sup>-1</sup>  
96: 3207.73 cm\*\*<sup>-1</sup>  
97: 3211.14 cm\*\*<sup>-1</sup>  
98: 3214.99 cm\*\*<sup>-1</sup>  
99: 3225.28 cm\*\*<sup>-1</sup>  
100: 3239.82 cm\*\*<sup>-1</sup>  
101: 3262.47 cm\*\*<sup>-1</sup>

|                              |                        |
|------------------------------|------------------------|
| Electronic energy            | -1241.88760845 hartree |
| Total thermal correction     | 0.01573228 hartree     |
| Non-thermal (ZPE) correction | 0.25887888 hartree     |
| Total thermal energy         | -1241.88760845 hartree |
| Total Enthalpy               | -1241.88666424 hartree |
| Final Gibbs free enthalpy    | -1241.94523425 hartree |

Energy Calculations at above geometry

T<sub>2</sub>

|                     |                            |
|---------------------|----------------------------|
| TD-B3LYP/6-31G(d,p) | -1242.045302825049 hartree |
|---------------------|----------------------------|

Benzo[b]phenanthro[9,10,d]thiophene *S*-oxide (3)  $S_1$  state

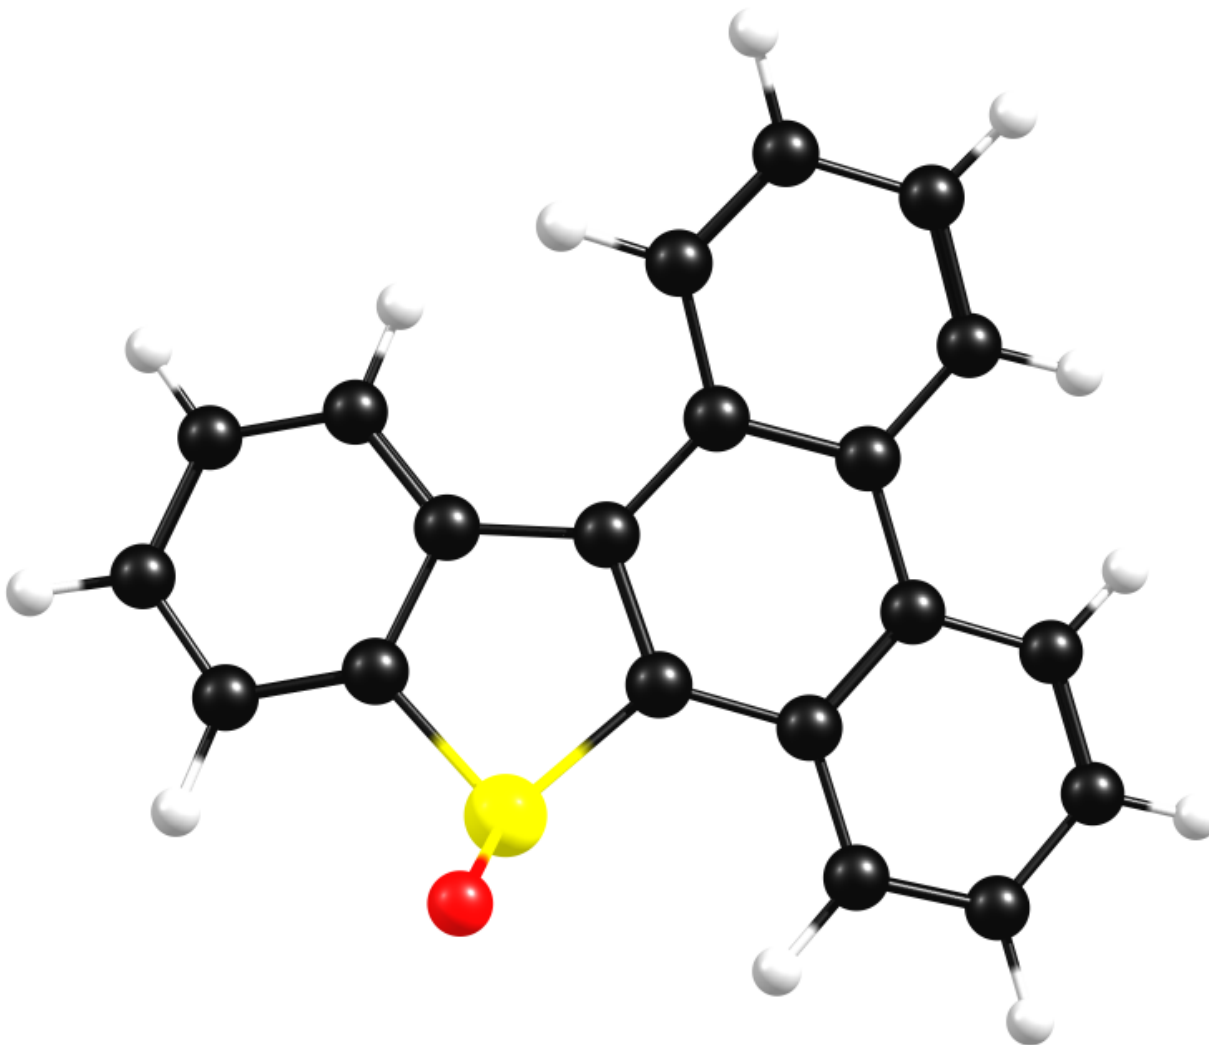

B3LYP/6-31G(d,p) optimization and Hessian

Coordinates

|   |           |           |           |
|---|-----------|-----------|-----------|
| S | -1.361367 | -1.928496 | 0.438978  |
| C | -4.724293 | 0.222599  | -0.316891 |
| C | -4.137154 | 1.497679  | -0.390575 |
| C | -3.910950 | -0.886573 | -0.085033 |
| H | -4.766774 | 2.361138  | -0.586947 |
| H | -4.331149 | -1.885940 | -0.021333 |
| C | -2.767886 | 1.693132  | -0.231509 |
| C | -2.546224 | -0.675492 | 0.058716  |
| H | -2.369962 | 2.693535  | -0.337088 |

|   |           |           |           |
|---|-----------|-----------|-----------|
| C | -1.903808 | 0.601152  | 0.007458  |
| H | -5.793860 | 0.098146  | -0.447536 |
| C | 1.730804  | -2.633283 | 0.013032  |
| C | 3.053190  | -2.986211 | -0.185838 |
| C | 1.333277  | -1.273537 | 0.038790  |
| C | 4.026109  | -1.990077 | -0.357861 |
| C | 2.325635  | -0.248721 | -0.095116 |
| C | 3.658304  | -0.651507 | -0.307986 |
| C | -0.018129 | -0.847541 | 0.149087  |
| C | -0.463902 | 0.503343  | 0.132819  |
| C | 0.545012  | 1.530955  | 0.176036  |
| C | 1.927403  | 1.162784  | 0.028191  |
| H | 0.983978  | -3.412182 | 0.142794  |
| H | 3.334239  | -4.035446 | -0.209162 |
| H | 5.064867  | -2.260542 | -0.521107 |
| H | 4.431276  | 0.097209  | -0.439690 |
| C | 0.230332  | 2.897944  | 0.383778  |
| C | 2.890421  | 2.192130  | 0.034130  |
| C | 2.548254  | 3.527622  | 0.191618  |
| C | 1.205821  | 3.879518  | 0.383467  |
| H | -0.791931 | 3.179032  | 0.597447  |
| H | 3.939994  | 1.942402  | -0.069500 |
| H | 3.322431  | 4.289302  | 0.189816  |
| H | 0.928097  | 4.916872  | 0.548670  |
| O | -1.530705 | -2.363308 | 1.931153  |

## Frequencies

|     |        |                    |
|-----|--------|--------------------|
| 0:  | 0.00   | cm** <sup>-1</sup> |
| 1:  | 0.00   | cm** <sup>-1</sup> |
| 2:  | 0.00   | cm** <sup>-1</sup> |
| 3:  | 0.00   | cm** <sup>-1</sup> |
| 4:  | 0.00   | cm** <sup>-1</sup> |
| 5:  | 0.00   | cm** <sup>-1</sup> |
| 6:  | 41.61  | cm** <sup>-1</sup> |
| 7:  | 65.60  | cm** <sup>-1</sup> |
| 8:  | 96.95  | cm** <sup>-1</sup> |
| 9:  | 101.66 | cm** <sup>-1</sup> |
| 10: | 121.97 | cm** <sup>-1</sup> |
| 11: | 143.01 | cm** <sup>-1</sup> |
| 12: | 175.23 | cm** <sup>-1</sup> |
| 13: | 201.39 | cm** <sup>-1</sup> |
| 14: | 240.28 | cm** <sup>-1</sup> |
| 15: | 259.65 | cm** <sup>-1</sup> |
| 16: | 285.64 | cm** <sup>-1</sup> |
| 17: | 295.78 | cm** <sup>-1</sup> |
| 18: | 332.09 | cm** <sup>-1</sup> |
| 19: | 362.34 | cm** <sup>-1</sup> |

|     |         |        |
|-----|---------|--------|
| 20: | 399.89  | cm**-1 |
| 21: | 404.07  | cm**-1 |
| 22: | 413.57  | cm**-1 |
| 23: | 433.16  | cm**-1 |
| 24: | 441.05  | cm**-1 |
| 25: | 497.62  | cm**-1 |
| 26: | 505.39  | cm**-1 |
| 27: | 521.93  | cm**-1 |
| 28: | 529.25  | cm**-1 |
| 29: | 571.15  | cm**-1 |
| 30: | 600.30  | cm**-1 |
| 31: | 615.23  | cm**-1 |
| 32: | 625.50  | cm**-1 |
| 33: | 638.29  | cm**-1 |
| 34: | 683.38  | cm**-1 |
| 35: | 702.48  | cm**-1 |
| 36: | 719.38  | cm**-1 |
| 37: | 730.13  | cm**-1 |
| 38: | 743.34  | cm**-1 |
| 39: | 748.34  | cm**-1 |
| 40: | 761.21  | cm**-1 |
| 41: | 766.55  | cm**-1 |
| 42: | 783.01  | cm**-1 |
| 43: | 787.75  | cm**-1 |
| 44: | 841.96  | cm**-1 |
| 45: | 850.42  | cm**-1 |
| 46: | 856.00  | cm**-1 |
| 47: | 870.90  | cm**-1 |
| 48: | 909.72  | cm**-1 |
| 49: | 920.95  | cm**-1 |
| 50: | 932.67  | cm**-1 |
| 51: | 942.49  | cm**-1 |
| 52: | 969.24  | cm**-1 |
| 53: | 976.89  | cm**-1 |
| 54: | 977.73  | cm**-1 |
| 55: | 981.44  | cm**-1 |
| 56: | 1010.13 | cm**-1 |
| 57: | 1046.31 | cm**-1 |
| 58: | 1052.92 | cm**-1 |
| 59: | 1075.30 | cm**-1 |
| 60: | 1080.65 | cm**-1 |
| 61: | 1128.27 | cm**-1 |
| 62: | 1155.01 | cm**-1 |
| 63: | 1160.90 | cm**-1 |
| 64: | 1177.59 | cm**-1 |
| 65: | 1189.37 | cm**-1 |
| 66: | 1193.45 | cm**-1 |
| 67: | 1200.34 | cm**-1 |

|      |         |                    |
|------|---------|--------------------|
| 68:  | 1256.99 | cm** <sup>-1</sup> |
| 69:  | 1262.30 | cm** <sup>-1</sup> |
| 70:  | 1291.62 | cm** <sup>-1</sup> |
| 71:  | 1298.86 | cm** <sup>-1</sup> |
| 72:  | 1332.41 | cm** <sup>-1</sup> |
| 73:  | 1346.84 | cm** <sup>-1</sup> |
| 74:  | 1352.74 | cm** <sup>-1</sup> |
| 75:  | 1380.42 | cm** <sup>-1</sup> |
| 76:  | 1395.96 | cm** <sup>-1</sup> |
| 77:  | 1433.32 | cm** <sup>-1</sup> |
| 78:  | 1468.98 | cm** <sup>-1</sup> |
| 79:  | 1473.47 | cm** <sup>-1</sup> |
| 80:  | 1486.66 | cm** <sup>-1</sup> |
| 81:  | 1496.21 | cm** <sup>-1</sup> |
| 82:  | 1517.83 | cm** <sup>-1</sup> |
| 83:  | 1539.61 | cm** <sup>-1</sup> |
| 84:  | 1579.65 | cm** <sup>-1</sup> |
| 85:  | 1596.23 | cm** <sup>-1</sup> |
| 86:  | 1598.69 | cm** <sup>-1</sup> |
| 87:  | 1614.67 | cm** <sup>-1</sup> |
| 88:  | 1644.38 | cm** <sup>-1</sup> |
| 89:  | 1648.79 | cm** <sup>-1</sup> |
| 90:  | 3172.70 | cm** <sup>-1</sup> |
| 91:  | 3181.83 | cm** <sup>-1</sup> |
| 92:  | 3188.06 | cm** <sup>-1</sup> |
| 93:  | 3188.22 | cm** <sup>-1</sup> |
| 94:  | 3196.72 | cm** <sup>-1</sup> |
| 95:  | 3197.53 | cm** <sup>-1</sup> |
| 96:  | 3201.46 | cm** <sup>-1</sup> |
| 97:  | 3210.92 | cm** <sup>-1</sup> |
| 98:  | 3218.14 | cm** <sup>-1</sup> |
| 99:  | 3224.14 | cm** <sup>-1</sup> |
| 100: | 3235.18 | cm** <sup>-1</sup> |
| 101: | 3255.92 | cm** <sup>-1</sup> |

|                              |                |         |
|------------------------------|----------------|---------|
| Electronic energy            | -1241.78524970 | hartree |
| Total thermal correction     | 0.01614497     | hartree |
| Non-thermal (ZPE) correction | 0.25591399     | hartree |
| Total thermal energy         | -1241.78524970 | hartree |
| Total Enthalpy               | -1241.78430550 | hartree |
| Final Gibbs free enthalpy    | -1241.84371438 | hartree |

Energy Calculations at above geometry

T<sub>2</sub>

|                     |                 |         |
|---------------------|-----------------|---------|
| TD-B3LYP/6-31G(d,p) | -1242.054010651 | hartree |
|---------------------|-----------------|---------|

Benzo[b]phenanthro[9,10,d]thiophene S-oxide (3) T<sub>1</sub> state

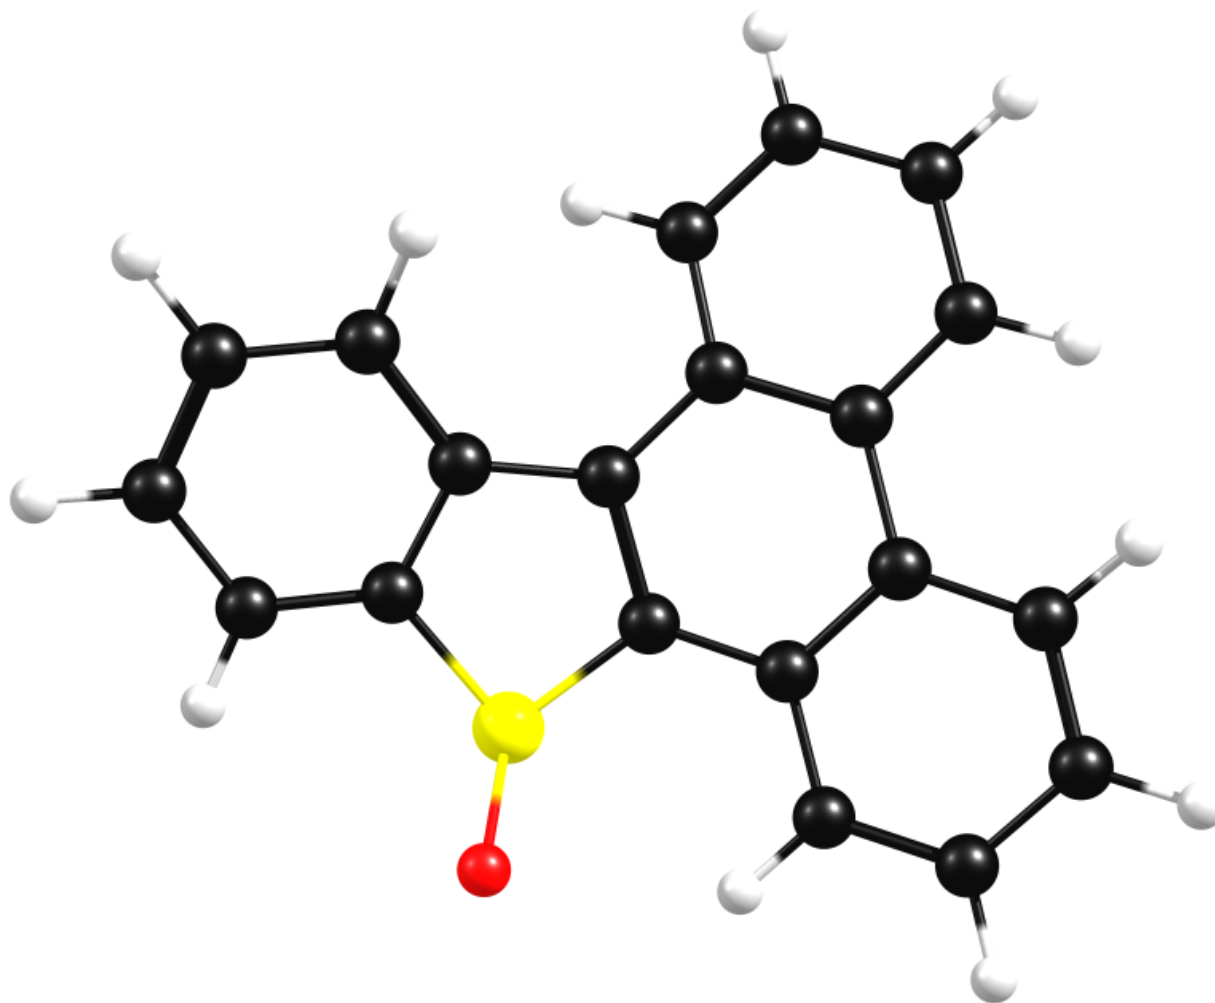

B3LYP/6-31G(d,p) optimization and Hessian

Coordinates

|   |           |           |           |
|---|-----------|-----------|-----------|
| S | -1.371830 | -1.963988 | -0.757580 |
| C | -4.681315 | 0.263345  | 0.184765  |
| C | -4.086891 | 1.503811  | 0.493655  |
| C | -3.878306 | -0.818119 | -0.196041 |
| H | -4.714438 | 2.325924  | 0.826442  |
| H | -4.315249 | -1.790631 | -0.404923 |
| C | -2.717574 | 1.690494  | 0.410374  |
| C | -2.510043 | -0.632647 | -0.288654 |
| H | -2.288141 | 2.633162  | 0.726212  |
| C | -1.873849 | 0.619369  | -0.008171 |
| H | -5.757879 | 0.142595  | 0.259039  |
| C | 1.700375  | -2.624327 | -0.137294 |
| C | 3.019150  | -2.983727 | 0.082579  |



|   |           |           |           |
|---|-----------|-----------|-----------|
| C | 1.307308  | -1.249770 | -0.145834 |
| C | 3.981006  | -1.995536 | 0.320803  |
| C | 2.305856  | -0.229416 | 0.077424  |
| C | 3.614217  | -0.639615 | 0.318778  |
| C | -0.020306 | -0.851386 | -0.339099 |
| C | -0.463834 | 0.553124  | -0.144220 |
| C | 0.538195  | 1.581749  | -0.125281 |
| C | 1.918740  | 1.204600  | -0.003731 |
| H | 0.935776  | -3.384206 | -0.255486 |
| H | 3.298802  | -4.033266 | 0.093605  |
| H | 5.012955  | -2.269599 | 0.518372  |
| H | 4.387490  | 0.095013  | 0.515429  |
| C | 0.220667  | 2.954108  | -0.270831 |
| C | 2.880278  | 2.218415  | 0.013930  |
| C | 2.538914  | 3.572302  | -0.087152 |
| C | 1.202668  | 3.937834  | -0.241472 |
| H | -0.805883 | 3.240857  | -0.460155 |
| H | 3.931376  | 1.963786  | 0.093195  |
| H | 3.319663  | 4.326789  | -0.067638 |
| H | 0.925973  | 4.981590  | -0.360081 |
| O | -1.492522 | -3.135005 | 0.201846  |

### Frequencies

|     |        |                    |
|-----|--------|--------------------|
| 0:  | 0.00   | cm** <sup>-1</sup> |
| 1:  | 0.00   | cm** <sup>-1</sup> |
| 2:  | 0.00   | cm** <sup>-1</sup> |
| 3:  | 0.00   | cm** <sup>-1</sup> |
| 4:  | 0.00   | cm** <sup>-1</sup> |
| 5:  | 0.00   | cm** <sup>-1</sup> |
| 6:  | 35.09  | cm** <sup>-1</sup> |
| 7:  | 72.31  | cm** <sup>-1</sup> |
| 8:  | 94.36  | cm** <sup>-1</sup> |
| 9:  | 103.55 | cm** <sup>-1</sup> |
| 10: | 117.49 | cm** <sup>-1</sup> |
| 11: | 147.69 | cm** <sup>-1</sup> |
| 12: | 169.30 | cm** <sup>-1</sup> |
| 13: | 218.64 | cm** <sup>-1</sup> |
| 14: | 232.25 | cm** <sup>-1</sup> |
| 15: | 261.79 | cm** <sup>-1</sup> |
| 16: | 270.38 | cm** <sup>-1</sup> |
| 17: | 295.87 | cm** <sup>-1</sup> |
| 18: | 338.36 | cm** <sup>-1</sup> |
| 19: | 374.06 | cm** <sup>-1</sup> |
| 20: | 396.21 | cm** <sup>-1</sup> |
| 21: | 402.97 | cm** <sup>-1</sup> |
| 22: | 425.65 | cm** <sup>-1</sup> |
| 23: | 440.21 | cm** <sup>-1</sup> |

|     |         |         |
|-----|---------|---------|
| 24: | 447.34  | cm** -1 |
| 25: | 465.57  | cm** -1 |
| 26: | 503.44  | cm** -1 |
| 27: | 520.28  | cm** -1 |
| 28: | 543.83  | cm** -1 |
| 29: | 559.66  | cm** -1 |
| 30: | 595.08  | cm** -1 |
| 31: | 607.83  | cm** -1 |
| 32: | 619.71  | cm** -1 |
| 33: | 634.99  | cm** -1 |
| 34: | 674.25  | cm** -1 |
| 35: | 695.84  | cm** -1 |
| 36: | 720.77  | cm** -1 |
| 37: | 729.25  | cm** -1 |
| 38: | 754.45  | cm** -1 |
| 39: | 759.19  | cm** -1 |
| 40: | 765.35  | cm** -1 |
| 41: | 769.47  | cm** -1 |
| 42: | 778.27  | cm** -1 |
| 43: | 810.36  | cm** -1 |
| 44: | 866.81  | cm** -1 |
| 45: | 878.40  | cm** -1 |
| 46: | 880.30  | cm** -1 |
| 47: | 906.89  | cm** -1 |
| 48: | 932.79  | cm** -1 |
| 49: | 943.27  | cm** -1 |
| 50: | 950.07  | cm** -1 |
| 51: | 966.03  | cm** -1 |
| 52: | 976.68  | cm** -1 |
| 53: | 983.37  | cm** -1 |
| 54: | 989.92  | cm** -1 |
| 55: | 999.38  | cm** -1 |
| 56: | 1032.15 | cm** -1 |
| 57: | 1042.25 | cm** -1 |
| 58: | 1058.61 | cm** -1 |
| 59: | 1071.32 | cm** -1 |
| 60: | 1076.39 | cm** -1 |
| 61: | 1114.72 | cm** -1 |
| 62: | 1130.64 | cm** -1 |
| 63: | 1147.78 | cm** -1 |
| 64: | 1153.91 | cm** -1 |
| 65: | 1179.80 | cm** -1 |
| 66: | 1181.96 | cm** -1 |
| 67: | 1199.36 | cm** -1 |
| 68: | 1237.59 | cm** -1 |
| 69: | 1245.88 | cm** -1 |
| 70: | 1291.39 | cm** -1 |
| 71: | 1315.38 | cm** -1 |

72: 1326.73 cm\*\*<sup>-1</sup>  
 73: 1331.18 cm\*\*<sup>-1</sup>  
 74: 1335.46 cm\*\*<sup>-1</sup>  
 75: 1360.13 cm\*\*<sup>-1</sup>  
 76: 1391.02 cm\*\*<sup>-1</sup>  
 77: 1426.52 cm\*\*<sup>-1</sup>  
 78: 1452.75 cm\*\*<sup>-1</sup>  
 79: 1467.51 cm\*\*<sup>-1</sup>  
 80: 1479.87 cm\*\*<sup>-1</sup>  
 81: 1481.66 cm\*\*<sup>-1</sup>  
 82: 1494.52 cm\*\*<sup>-1</sup>  
 83: 1524.71 cm\*\*<sup>-1</sup>  
 84: 1568.71 cm\*\*<sup>-1</sup>  
 85: 1574.75 cm\*\*<sup>-1</sup>  
 86: 1598.37 cm\*\*<sup>-1</sup>  
 87: 1599.54 cm\*\*<sup>-1</sup>  
 88: 1606.38 cm\*\*<sup>-1</sup>  
 89: 1629.75 cm\*\*<sup>-1</sup>  
 90: 3185.10 cm\*\*<sup>-1</sup>  
 91: 3186.02 cm\*\*<sup>-1</sup>  
 92: 3187.47 cm\*\*<sup>-1</sup>  
 93: 3193.38 cm\*\*<sup>-1</sup>  
 94: 3198.45 cm\*\*<sup>-1</sup>  
 95: 3202.47 cm\*\*<sup>-1</sup>  
 96: 3208.24 cm\*\*<sup>-1</sup>  
 97: 3210.59 cm\*\*<sup>-1</sup>  
 98: 3219.45 cm\*\*<sup>-1</sup>  
 99: 3221.38 cm\*\*<sup>-1</sup>  
 100: 3225.01 cm\*\*<sup>-1</sup>  
 101: 3241.87 cm\*\*<sup>-1</sup>

|                              |                        |
|------------------------------|------------------------|
| Electronic energy            | -1242.08254200 hartree |
| Total thermal correction     | 0.01611358 hartree     |
| Non-thermal (ZPE) correction | 0.25568602 hartree     |
| Total thermal energy         | -1241.81074239 hartree |
| Total Enthalpy               | -1241.80979819 hartree |
| Final Gibbs free enthalpy    | -1241.87028893 hartree |

Energy Calculations at above geometry

T<sub>2</sub>

|                     |                            |
|---------------------|----------------------------|
| TD-B3LYP/6-31G(d,p) | -1242.042965691264 hartree |
|---------------------|----------------------------|

dinaphtho[2,1-b:2',1'-d]thiophene S-oxide (4) S<sub>0</sub> state

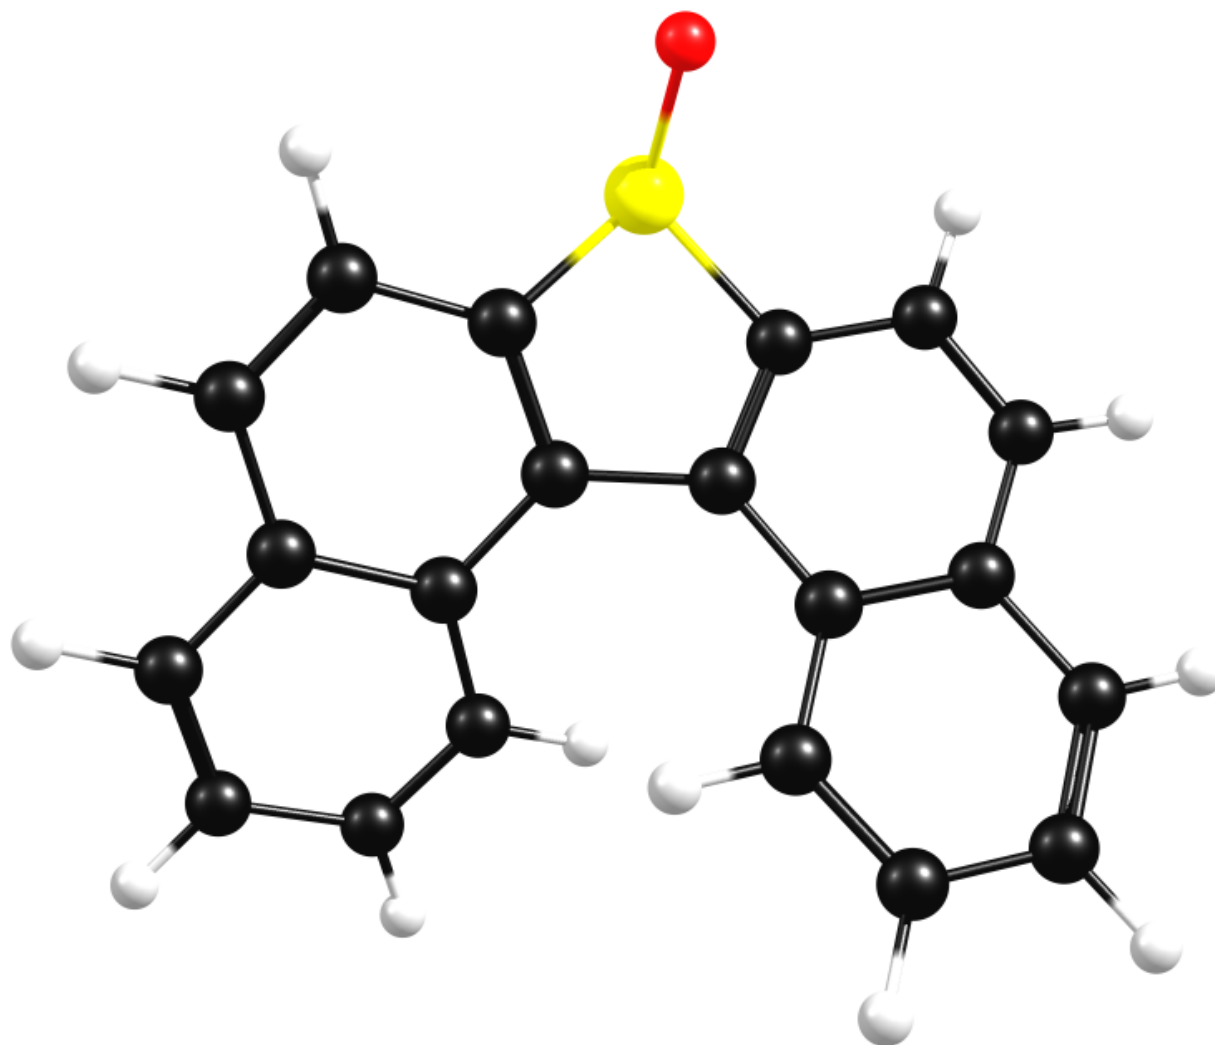

B3LYP/6-31G(d,p) optimization and Hessian

Coordinates

|   |           |           |           |
|---|-----------|-----------|-----------|
| H | -4.498640 | 1.303641  | 0.845057  |
| C | -3.465428 | 1.124656  | 0.560470  |
| C | -2.573676 | 2.168960  | 0.467442  |
| C | -1.232590 | 1.879181  | 0.167881  |
| C | -0.740098 | 0.585819  | -0.015648 |
| C | -1.702752 | -0.474163 | -0.151517 |
| C | -3.070894 | -0.193910 | 0.204511  |
| C | -4.034902 | -1.236012 | 0.123444  |
| C | -3.702663 | -2.477592 | -0.366999 |
| C | -2.385933 | -2.721533 | -0.821929 |

|   |           |           |           |
|---|-----------|-----------|-----------|
| C | -1.415371 | -1.748774 | -0.716122 |
| H | -2.881104 | 3.195217  | 0.645730  |
| H | -0.423992 | -1.943936 | -1.105061 |
| H | -2.139105 | -3.679656 | -1.270288 |
| H | -4.454384 | -3.258597 | -0.437895 |
| H | -5.055453 | -1.019637 | 0.428667  |
| C | 0.742921  | 0.576924  | -0.125717 |
| C | 1.233198  | 1.860997  | -0.341039 |
| C | 2.588064  | 2.162834  | -0.550590 |
| C | 3.497969  | 1.131783  | -0.516051 |
| C | 3.088224  | -0.186782 | -0.177557 |
| C | 1.699260  | -0.479766 | 0.074002  |
| C | 1.385729  | -1.757705 | 0.617448  |
| C | 2.357044  | -2.717762 | 0.802193  |
| C | 3.702632  | -2.459556 | 0.453437  |
| C | 4.056321  | -1.215142 | -0.013494 |
| H | 2.899213  | 3.188368  | -0.725528 |
| H | 4.553685  | 1.321561  | -0.690845 |
| H | 5.094870  | -0.985950 | -0.238566 |
| H | 4.455988  | -3.230599 | 0.587176  |
| H | 2.086424  | -3.677314 | 1.233472  |
| H | 0.371699  | -1.966746 | 0.931072  |
| S | -0.035971 | 3.147142  | -0.300081 |
| O | 0.264156  | 4.175301  | 0.768250  |

## Frequencies

|     |        |                    |
|-----|--------|--------------------|
| 0:  | 0.00   | cm** <sup>-1</sup> |
| 1:  | 0.00   | cm** <sup>-1</sup> |
| 2:  | 0.00   | cm** <sup>-1</sup> |
| 3:  | 0.00   | cm** <sup>-1</sup> |
| 4:  | 0.00   | cm** <sup>-1</sup> |
| 5:  | 0.00   | cm** <sup>-1</sup> |
| 6:  | 61.06  | cm** <sup>-1</sup> |
| 7:  | 66.34  | cm** <sup>-1</sup> |
| 8:  | 82.18  | cm** <sup>-1</sup> |
| 9:  | 91.87  | cm** <sup>-1</sup> |
| 10: | 149.54 | cm** <sup>-1</sup> |
| 11: | 181.89 | cm** <sup>-1</sup> |
| 12: | 187.98 | cm** <sup>-1</sup> |
| 13: | 192.51 | cm** <sup>-1</sup> |
| 14: | 239.58 | cm** <sup>-1</sup> |
| 15: | 247.12 | cm** <sup>-1</sup> |
| 16: | 288.84 | cm** <sup>-1</sup> |
| 17: | 324.98 | cm** <sup>-1</sup> |
| 18: | 343.99 | cm** <sup>-1</sup> |
| 19: | 397.29 | cm** <sup>-1</sup> |
| 20: | 407.72 | cm** <sup>-1</sup> |

|     |         |         |
|-----|---------|---------|
| 21: | 427.44  | cm** -1 |
| 22: | 457.35  | cm** -1 |
| 23: | 467.35  | cm** -1 |
| 24: | 500.40  | cm** -1 |
| 25: | 518.06  | cm** -1 |
| 26: | 533.46  | cm** -1 |
| 27: | 544.94  | cm** -1 |
| 28: | 548.07  | cm** -1 |
| 29: | 555.70  | cm** -1 |
| 30: | 589.89  | cm** -1 |
| 31: | 607.00  | cm** -1 |
| 32: | 632.32  | cm** -1 |
| 33: | 651.47  | cm** -1 |
| 34: | 665.39  | cm** -1 |
| 35: | 691.29  | cm** -1 |
| 36: | 705.49  | cm** -1 |
| 37: | 761.49  | cm** -1 |
| 38: | 768.03  | cm** -1 |
| 39: | 781.56  | cm** -1 |
| 40: | 797.65  | cm** -1 |
| 41: | 799.09  | cm** -1 |
| 42: | 826.20  | cm** -1 |
| 43: | 828.99  | cm** -1 |
| 44: | 846.01  | cm** -1 |
| 45: | 866.35  | cm** -1 |
| 46: | 881.70  | cm** -1 |
| 47: | 887.06  | cm** -1 |
| 48: | 892.82  | cm** -1 |
| 49: | 953.37  | cm** -1 |
| 50: | 958.94  | cm** -1 |
| 51: | 961.24  | cm** -1 |
| 52: | 969.85  | cm** -1 |
| 53: | 978.76  | cm** -1 |
| 54: | 995.85  | cm** -1 |
| 55: | 1007.10 | cm** -1 |
| 56: | 1053.56 | cm** -1 |
| 57: | 1055.39 | cm** -1 |
| 58: | 1066.43 | cm** -1 |
| 59: | 1079.38 | cm** -1 |
| 60: | 1148.25 | cm** -1 |
| 61: | 1167.73 | cm** -1 |
| 62: | 1169.84 | cm** -1 |
| 63: | 1172.55 | cm** -1 |
| 64: | 1175.44 | cm** -1 |
| 65: | 1187.78 | cm** -1 |
| 66: | 1193.19 | cm** -1 |
| 67: | 1215.12 | cm** -1 |
| 68: | 1242.28 | cm** -1 |

69: 1245.99 cm\*\*-1  
70: 1280.22 cm\*\*-1  
71: 1300.19 cm\*\*-1  
72: 1361.71 cm\*\*-1  
73: 1370.12 cm\*\*-1  
74: 1389.25 cm\*\*-1  
75: 1392.59 cm\*\*-1  
76: 1400.88 cm\*\*-1  
77: 1419.71 cm\*\*-1  
78: 1467.79 cm\*\*-1  
79: 1468.48 cm\*\*-1  
80: 1479.91 cm\*\*-1  
81: 1491.24 cm\*\*-1  
82: 1553.71 cm\*\*-1  
83: 1557.06 cm\*\*-1  
84: 1595.99 cm\*\*-1  
85: 1611.86 cm\*\*-1  
86: 1622.40 cm\*\*-1  
87: 1627.92 cm\*\*-1  
88: 1667.84 cm\*\*-1  
89: 1669.68 cm\*\*-1  
90: 3177.69 cm\*\*-1  
91: 3177.88 cm\*\*-1  
92: 3185.07 cm\*\*-1  
93: 3185.66 cm\*\*-1  
94: 3188.44 cm\*\*-1  
95: 3188.76 cm\*\*-1  
96: 3202.74 cm\*\*-1  
97: 3203.26 cm\*\*-1  
98: 3204.99 cm\*\*-1  
99: 3206.04 cm\*\*-1  
100: 3229.56 cm\*\*-1  
101: 3242.69 cm\*\*-1

|                              |                        |
|------------------------------|------------------------|
| Electronic energy            | -1242.14978060 hartree |
| Total thermal correction     | 0.01564831 hartree     |
| Non-thermal (ZPE) correction | 0.25837797 hartree     |
| Total thermal energy         | -1241.87575432 hartree |
| Total Enthalpy               | -1241.87481011 hartree |
| Final Gibbs free enthalpy    | -1241.93308271 hartree |

Energy Calculations at above geometry

T<sub>2</sub>

|                     |                            |
|---------------------|----------------------------|
| TD-B3LYP/6-31G(d,p) | -1242.043111554471 hartree |
|---------------------|----------------------------|

dinaphtho[2,1-b:2',1'-d]thiophene S-oxide (4) S<sub>1</sub> state

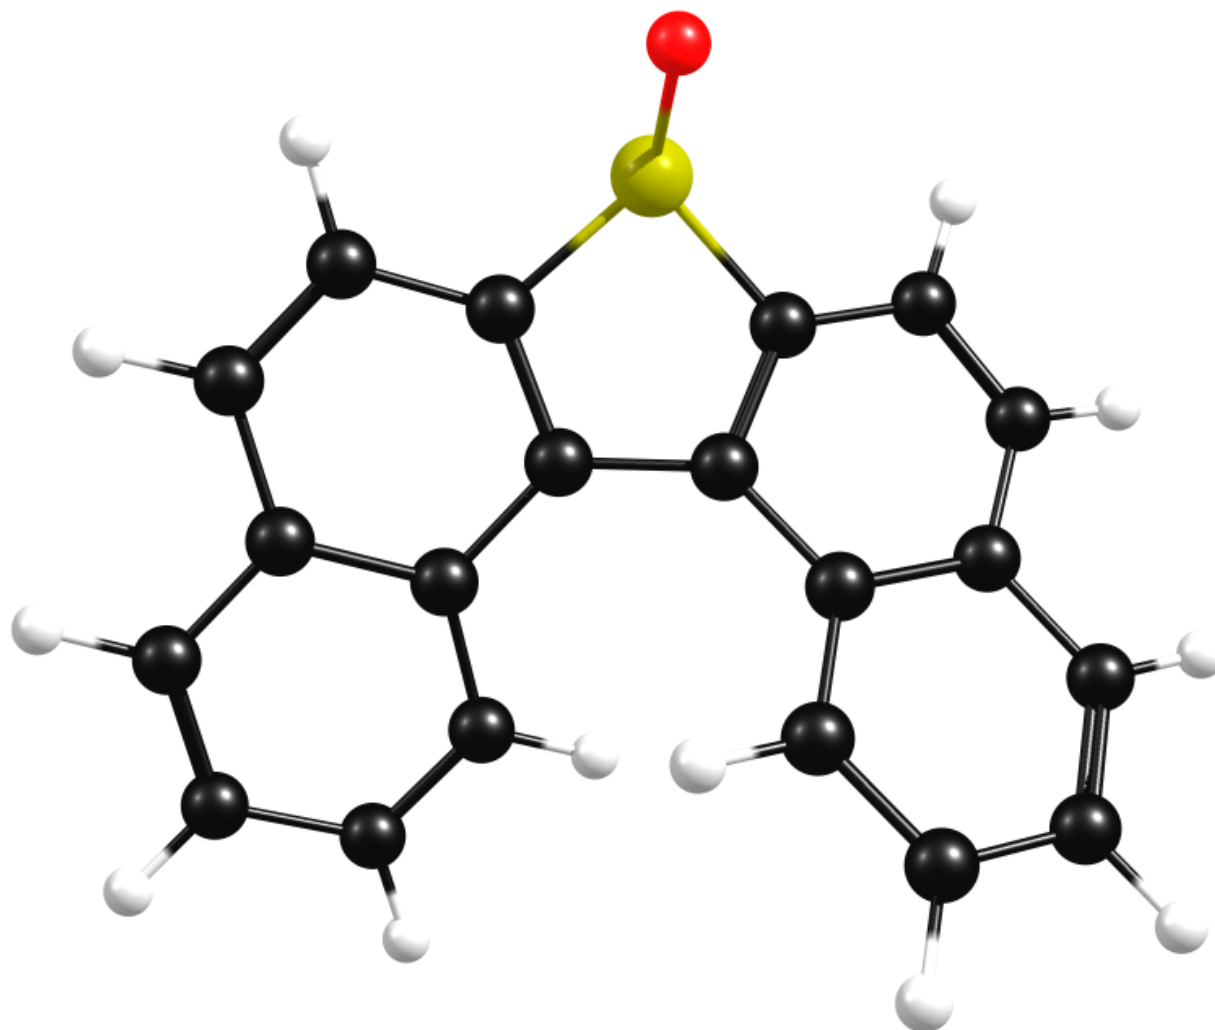

TD-B3LYP/6-31G(d,p) optimization and Hessian

Coordinates

|   |           |           |           |
|---|-----------|-----------|-----------|
| H | -4.573780 | 1.402281  | 0.478546  |
| C | -3.518199 | 1.196008  | 0.332504  |
| C | -2.602699 | 2.222533  | 0.299807  |
| C | -1.252107 | 1.899610  | 0.114736  |
| C | -0.725637 | 0.582061  | 0.007613  |
| C | -1.711647 | -0.470708 | -0.121982 |
| C | -3.101704 | -0.150331 | 0.093320  |
| C | -4.068802 | -1.182273 | -0.001870 |
| C | -3.719976 | -2.467191 | -0.366740 |
| C | -2.377774 | -2.758995 | -0.677143 |
| C | -1.403157 | -1.785199 | -0.558703 |
| H | -2.913417 | 3.255293  | 0.425697  |



|   |           |           |           |
|---|-----------|-----------|-----------|
| H | -0.385709 | -2.023686 | -0.837852 |
| H | -2.103537 | -3.751365 | -1.023845 |
| H | -4.479358 | -3.240221 | -0.443104 |
| H | -5.108540 | -0.931611 | 0.193232  |
| C | 0.722138  | 0.575420  | -0.072542 |
| C | 1.249043  | 1.887813  | -0.293753 |
| C | 2.580897  | 2.178313  | -0.606707 |
| C | 3.472715  | 1.129654  | -0.679939 |
| C | 3.077846  | -0.182865 | -0.268335 |
| C | 1.714044  | -0.461296 | 0.114472  |
| C | 1.446968  | -1.707338 | 0.736631  |
| C | 2.423399  | -2.680697 | 0.860873  |
| C | 3.725842  | -2.446465 | 0.381413  |
| C | 4.043074  | -1.214007 | -0.157683 |
| H | 2.896401  | 3.200448  | -0.795479 |
| H | 4.503486  | 1.301348  | -0.973232 |
| H | 5.059827  | -1.003778 | -0.480229 |
| H | 4.485303  | -3.218799 | 0.464250  |
| H | 2.182041  | -3.624883 | 1.340990  |
| H | 0.461002  | -1.892090 | 1.144470  |
| S | 0.045694  | 3.090573  | 0.137306  |
| O | 0.220761  | 3.663693  | 1.578603  |

### Frequencies

|     |        |                    |
|-----|--------|--------------------|
| 0:  | 0.00   | cm** <sup>-1</sup> |
| 1:  | 0.00   | cm** <sup>-1</sup> |
| 2:  | 0.00   | cm** <sup>-1</sup> |
| 3:  | 0.00   | cm** <sup>-1</sup> |
| 4:  | 0.00   | cm** <sup>-1</sup> |
| 5:  | 0.00   | cm** <sup>-1</sup> |
| 6:  | 61.35  | cm** <sup>-1</sup> |
| 7:  | 66.96  | cm** <sup>-1</sup> |
| 8:  | 85.16  | cm** <sup>-1</sup> |
| 9:  | 99.67  | cm** <sup>-1</sup> |
| 10: | 145.45 | cm** <sup>-1</sup> |
| 11: | 177.32 | cm** <sup>-1</sup> |
| 12: | 192.87 | cm** <sup>-1</sup> |
| 13: | 200.46 | cm** <sup>-1</sup> |
| 14: | 229.32 | cm** <sup>-1</sup> |
| 15: | 248.32 | cm** <sup>-1</sup> |
| 16: | 281.74 | cm** <sup>-1</sup> |
| 17: | 305.21 | cm** <sup>-1</sup> |
| 18: | 342.31 | cm** <sup>-1</sup> |
| 19: | 371.13 | cm** <sup>-1</sup> |
| 20: | 390.44 | cm** <sup>-1</sup> |
| 21: | 412.26 | cm** <sup>-1</sup> |
| 22: | 448.25 | cm** <sup>-1</sup> |

|     |         |        |
|-----|---------|--------|
| 23: | 472.68  | cm**-1 |
| 24: | 490.52  | cm**-1 |
| 25: | 500.90  | cm**-1 |
| 26: | 507.66  | cm**-1 |
| 27: | 517.65  | cm**-1 |
| 28: | 537.59  | cm**-1 |
| 29: | 550.29  | cm**-1 |
| 30: | 579.32  | cm**-1 |
| 31: | 605.52  | cm**-1 |
| 32: | 633.36  | cm**-1 |
| 33: | 643.25  | cm**-1 |
| 34: | 646.66  | cm**-1 |
| 35: | 666.52  | cm**-1 |
| 36: | 693.74  | cm**-1 |
| 37: | 737.44  | cm**-1 |
| 38: | 743.28  | cm**-1 |
| 39: | 768.19  | cm**-1 |
| 40: | 776.87  | cm**-1 |
| 41: | 786.72  | cm**-1 |
| 42: | 794.26  | cm**-1 |
| 43: | 801.55  | cm**-1 |
| 44: | 805.06  | cm**-1 |
| 45: | 852.41  | cm**-1 |
| 46: | 864.42  | cm**-1 |
| 47: | 876.30  | cm**-1 |
| 48: | 886.83  | cm**-1 |
| 49: | 904.25  | cm**-1 |
| 50: | 922.66  | cm**-1 |
| 51: | 929.80  | cm**-1 |
| 52: | 943.75  | cm**-1 |
| 53: | 951.55  | cm**-1 |
| 54: | 966.16  | cm**-1 |
| 55: | 982.18  | cm**-1 |
| 56: | 999.94  | cm**-1 |
| 57: | 1058.52 | cm**-1 |
| 58: | 1061.27 | cm**-1 |
| 59: | 1075.54 | cm**-1 |
| 60: | 1135.05 | cm**-1 |
| 61: | 1151.65 | cm**-1 |
| 62: | 1155.54 | cm**-1 |
| 63: | 1168.08 | cm**-1 |
| 64: | 1173.43 | cm**-1 |
| 65: | 1183.55 | cm**-1 |
| 66: | 1188.05 | cm**-1 |
| 67: | 1211.03 | cm**-1 |
| 68: | 1238.53 | cm**-1 |
| 69: | 1252.90 | cm**-1 |
| 70: | 1279.13 | cm**-1 |

71: 1302.93 cm\*\*<sup>-1</sup>  
72: 1346.29 cm\*\*<sup>-1</sup>  
73: 1355.16 cm\*\*<sup>-1</sup>  
74: 1359.77 cm\*\*<sup>-1</sup>  
75: 1372.83 cm\*\*<sup>-1</sup>  
76: 1381.59 cm\*\*<sup>-1</sup>  
77: 1431.53 cm\*\*<sup>-1</sup>  
78: 1461.12 cm\*\*<sup>-1</sup>  
79: 1463.94 cm\*\*<sup>-1</sup>  
80: 1477.29 cm\*\*<sup>-1</sup>  
81: 1482.03 cm\*\*<sup>-1</sup>  
82: 1537.50 cm\*\*<sup>-1</sup>  
83: 1550.65 cm\*\*<sup>-1</sup>  
84: 1561.14 cm\*\*<sup>-1</sup>  
85: 1576.60 cm\*\*<sup>-1</sup>  
86: 1594.04 cm\*\*<sup>-1</sup>  
87: 1603.49 cm\*\*<sup>-1</sup>  
88: 1647.46 cm\*\*<sup>-1</sup>  
89: 1653.71 cm\*\*<sup>-1</sup>  
90: 3175.32 cm\*\*<sup>-1</sup>  
91: 3176.04 cm\*\*<sup>-1</sup>  
92: 3186.58 cm\*\*<sup>-1</sup>  
93: 3187.69 cm\*\*<sup>-1</sup>  
94: 3189.28 cm\*\*<sup>-1</sup>  
95: 3192.84 cm\*\*<sup>-1</sup>  
96: 3202.15 cm\*\*<sup>-1</sup>  
97: 3203.37 cm\*\*<sup>-1</sup>  
98: 3206.41 cm\*\*<sup>-1</sup>  
99: 3208.95 cm\*\*<sup>-1</sup>  
100: 3228.11 cm\*\*<sup>-1</sup>  
101: 3244.26 cm\*\*<sup>-1</sup>

|                              |                        |
|------------------------------|------------------------|
| Electronic energy            | -1242.04794786 hartree |
| Total thermal correction     | 0.01595420 hartree     |
| Non-thermal (ZPE) correction | 0.25581501 hartree     |
| Total thermal energy         | -1241.77617865 hartree |
| Total Enthalpy               | -1241.77523444 hartree |
| Final Gibbs free enthalpy    | -1241.83389259 hartree |

Energy Calculations at above geometry

T<sub>2</sub>

TD-B3LYP/6-31G(d,p) -1242.053750417977 hartree

dinaphtho[2,1-b:2',1'-d]thiophene S-oxide (4) T<sub>1</sub> state

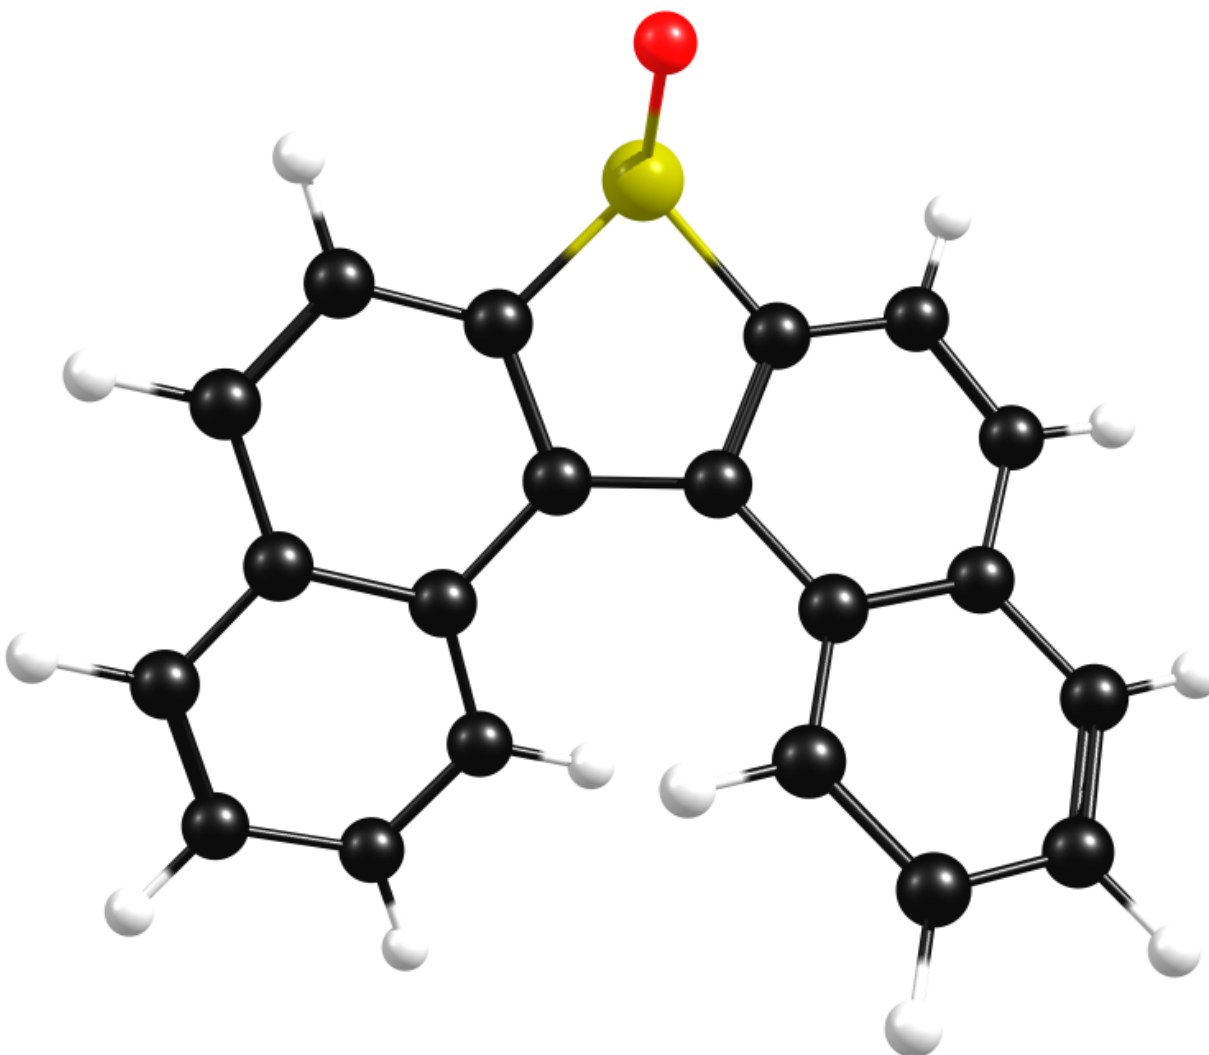

TD-B3LYP/6-31G(d,p) optimization and Hessian

Coordinates

|   |           |           |           |
|---|-----------|-----------|-----------|
| H | -4.474351 | 1.404206  | 0.771922  |
| C | -3.434402 | 1.214545  | 0.522877  |
| C | -2.529761 | 2.271188  | 0.421378  |
| C | -1.205440 | 2.007101  | 0.127928  |
| C | -0.678316 | 0.651101  | 0.022432  |
| C | -1.667467 | -0.425156 | -0.108059 |
| C | -3.035503 | -0.128036 | 0.206365  |
| C | -4.000912 | -1.152841 | 0.121362  |
| C | -3.665704 | -2.424848 | -0.327766 |
| C | -2.350974 | -2.689455 | -0.723463 |
| C | -1.371975 | -1.701348 | -0.615681 |

|   |           |           |           |
|---|-----------|-----------|-----------|
| H | -2.857183 | 3.293757  | 0.588329  |
| H | -0.364615 | -1.922571 | -0.946623 |
| H | -2.085037 | -3.664558 | -1.120957 |
| H | -4.425338 | -3.198423 | -0.393887 |
| H | -5.028476 | -0.922707 | 0.391211  |
| C | 0.722372  | 0.647414  | 0.024343  |
| C | 1.247226  | 1.994945  | -0.184584 |
| C | 2.562146  | 2.234535  | -0.526033 |
| C | 3.459781  | 1.165017  | -0.593989 |
| C | 3.069884  | -0.150794 | -0.171209 |
| C | 1.711686  | -0.420857 | 0.204775  |
| C | 1.429906  | -1.651548 | 0.819074  |
| C | 2.410403  | -2.634197 | 0.969031  |
| C | 3.711351  | -2.404907 | 0.512227  |
| C | 4.035232  | -1.170591 | -0.040902 |
| H | 2.897611  | 3.246172  | -0.738964 |
| H | 4.490480  | 1.333002  | -0.891862 |
| H | 5.054680  | -0.965621 | -0.357421 |
| H | 4.471638  | -3.174389 | 0.611519  |
| H | 2.155313  | -3.576502 | 1.444915  |
| H | 0.433235  | -1.839997 | 1.199677  |
| S | 0.032487  | 3.314648  | 0.023239  |
| O | 0.179337  | 4.007888  | 1.364023  |

## Frequencies

|     |        |                    |
|-----|--------|--------------------|
| 0:  | 0.00   | cm** <sup>-1</sup> |
| 1:  | 0.00   | cm** <sup>-1</sup> |
| 2:  | 0.00   | cm** <sup>-1</sup> |
| 3:  | 0.00   | cm** <sup>-1</sup> |
| 4:  | 0.00   | cm** <sup>-1</sup> |
| 5:  | 0.00   | cm** <sup>-1</sup> |
| 6:  | 39.86  | cm** <sup>-1</sup> |
| 7:  | 66.49  | cm** <sup>-1</sup> |
| 8:  | 79.32  | cm** <sup>-1</sup> |
| 9:  | 90.83  | cm** <sup>-1</sup> |
| 10: | 146.51 | cm** <sup>-1</sup> |
| 11: | 172.16 | cm** <sup>-1</sup> |
| 12: | 175.03 | cm** <sup>-1</sup> |
| 13: | 189.04 | cm** <sup>-1</sup> |
| 14: | 234.96 | cm** <sup>-1</sup> |
| 15: | 238.35 | cm** <sup>-1</sup> |
| 16: | 288.63 | cm** <sup>-1</sup> |
| 17: | 323.40 | cm** <sup>-1</sup> |
| 18: | 348.32 | cm** <sup>-1</sup> |
| 19: | 374.39 | cm** <sup>-1</sup> |
| 20: | 383.87 | cm** <sup>-1</sup> |

|     |         |        |
|-----|---------|--------|
| 21: | 407.17  | cm**-1 |
| 22: | 436.67  | cm**-1 |
| 23: | 465.07  | cm**-1 |
| 24: | 471.26  | cm**-1 |
| 25: | 505.81  | cm**-1 |
| 26: | 514.23  | cm**-1 |
| 27: | 526.50  | cm**-1 |
| 28: | 533.80  | cm**-1 |
| 29: | 536.83  | cm**-1 |
| 30: | 554.10  | cm**-1 |
| 31: | 606.80  | cm**-1 |
| 32: | 624.58  | cm**-1 |
| 33: | 633.54  | cm**-1 |
| 34: | 642.37  | cm**-1 |
| 35: | 682.55  | cm**-1 |
| 36: | 688.95  | cm**-1 |
| 37: | 734.73  | cm**-1 |
| 38: | 747.97  | cm**-1 |
| 39: | 765.75  | cm**-1 |
| 40: | 775.93  | cm**-1 |
| 41: | 786.15  | cm**-1 |
| 42: | 793.05  | cm**-1 |
| 43: | 800.95  | cm**-1 |
| 44: | 840.44  | cm**-1 |
| 45: | 870.36  | cm**-1 |
| 46: | 885.13  | cm**-1 |
| 47: | 887.12  | cm**-1 |
| 48: | 894.62  | cm**-1 |
| 49: | 925.69  | cm**-1 |
| 50: | 930.25  | cm**-1 |
| 51: | 943.58  | cm**-1 |
| 52: | 955.69  | cm**-1 |
| 53: | 968.49  | cm**-1 |
| 54: | 984.68  | cm**-1 |
| 55: | 996.97  | cm**-1 |
| 56: | 1049.55 | cm**-1 |
| 57: | 1056.06 | cm**-1 |
| 58: | 1058.50 | cm**-1 |
| 59: | 1077.40 | cm**-1 |
| 60: | 1089.94 | cm**-1 |
| 61: | 1126.14 | cm**-1 |
| 62: | 1134.71 | cm**-1 |
| 63: | 1145.71 | cm**-1 |
| 64: | 1149.32 | cm**-1 |
| 65: | 1182.58 | cm**-1 |
| 66: | 1188.32 | cm**-1 |
| 67: | 1207.04 | cm**-1 |
| 68: | 1217.23 | cm**-1 |

|      |         |                    |
|------|---------|--------------------|
| 69:  | 1242.83 | cm** <sup>-1</sup> |
| 70:  | 1254.32 | cm** <sup>-1</sup> |
| 71:  | 1290.63 | cm** <sup>-1</sup> |
| 72:  | 1306.62 | cm** <sup>-1</sup> |
| 73:  | 1328.11 | cm** <sup>-1</sup> |
| 74:  | 1347.21 | cm** <sup>-1</sup> |
| 75:  | 1374.35 | cm** <sup>-1</sup> |
| 76:  | 1377.72 | cm** <sup>-1</sup> |
| 77:  | 1428.57 | cm** <sup>-1</sup> |
| 78:  | 1442.19 | cm** <sup>-1</sup> |
| 79:  | 1464.92 | cm** <sup>-1</sup> |
| 80:  | 1473.09 | cm** <sup>-1</sup> |
| 81:  | 1488.98 | cm** <sup>-1</sup> |
| 82:  | 1505.23 | cm** <sup>-1</sup> |
| 83:  | 1521.98 | cm** <sup>-1</sup> |
| 84:  | 1529.50 | cm** <sup>-1</sup> |
| 85:  | 1558.01 | cm** <sup>-1</sup> |
| 86:  | 1596.78 | cm** <sup>-1</sup> |
| 87:  | 1605.35 | cm** <sup>-1</sup> |
| 88:  | 1625.33 | cm** <sup>-1</sup> |
| 89:  | 1630.22 | cm** <sup>-1</sup> |
| 90:  | 3179.65 | cm** <sup>-1</sup> |
| 91:  | 3180.05 | cm** <sup>-1</sup> |
| 92:  | 3185.80 | cm** <sup>-1</sup> |
| 93:  | 3188.39 | cm** <sup>-1</sup> |
| 94:  | 3191.42 | cm** <sup>-1</sup> |
| 95:  | 3191.73 | cm** <sup>-1</sup> |
| 96:  | 3201.79 | cm** <sup>-1</sup> |
| 97:  | 3202.91 | cm** <sup>-1</sup> |
| 98:  | 3205.62 | cm** <sup>-1</sup> |
| 99:  | 3206.29 | cm** <sup>-1</sup> |
| 100: | 3224.88 | cm** <sup>-1</sup> |
| 101: | 3231.30 | cm** <sup>-1</sup> |

|                              |                |         |
|------------------------------|----------------|---------|
| Electronic energy            | -1242.07908244 | hartree |
| Total thermal correction     | 0.01608455     | hartree |
| Non-thermal (ZPE) correction | 0.25500261     | hartree |
| Total thermal energy         | -1241.80799528 | hartree |
| Total Enthalpy               | -1241.80705107 | hartree |
| Final Gibbs free enthalpy    | -1241.86747772 | hartree |

Energy Calculations at above geometry

T<sub>2</sub>

|                     |                    |         |
|---------------------|--------------------|---------|
| TD-B3LYP/6-31G(d,p) | -1242.040583540381 | hartree |
|---------------------|--------------------|---------|

dinaphtho[1,2-b:2',1'-d]thiophene *S*-oxide (5)  $S_0$  state

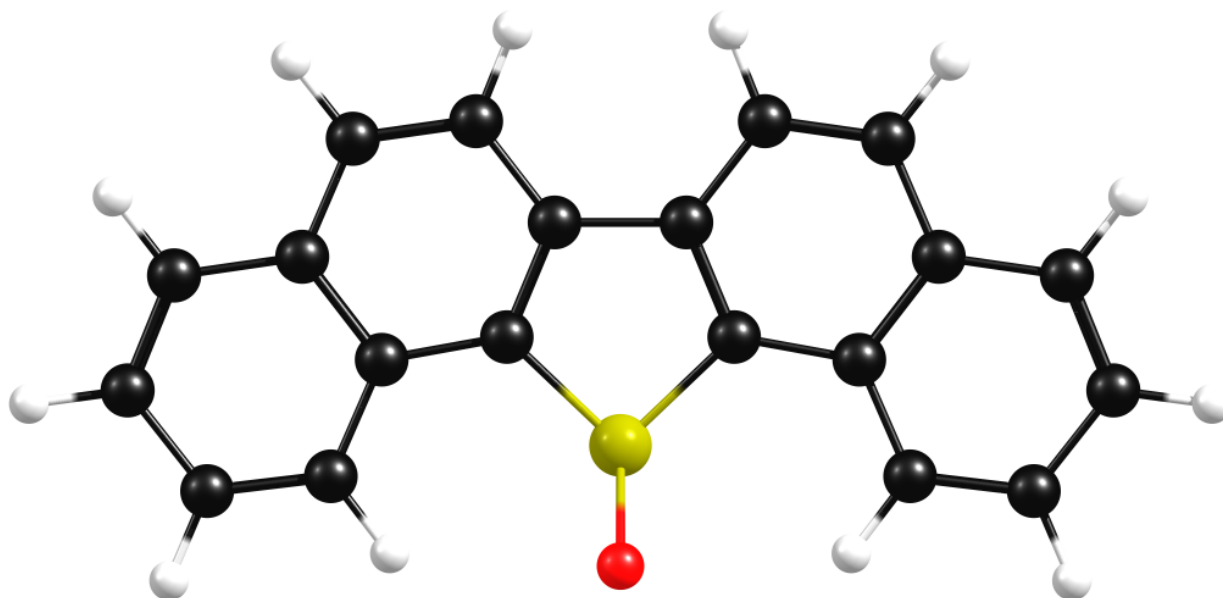

B3LYP/6-31G(d,p) optimization and Hessian

Coordinates

|   |           |           |           |
|---|-----------|-----------|-----------|
| S | 0.000007  | -1.278872 | -0.443526 |
| H | 5.591324  | 1.516477  | 0.107662  |
| C | 4.936785  | 0.650913  | 0.040470  |
| C | 5.462247  | -0.621196 | -0.007751 |
| C | 4.603761  | -1.745404 | -0.085458 |
| C | 3.236373  | -1.586191 | -0.119976 |
| C | 2.665892  | -0.283909 | -0.084427 |
| C | 3.532434  | 0.859782  | 0.004831  |
| C | 2.964352  | 2.164573  | 0.053637  |
| C | 1.602780  | 2.364268  | 0.032542  |
| C | 0.734739  | 1.246217  | -0.041174 |
| C | 1.272646  | -0.031418 | -0.111298 |
| H | 6.538514  | -0.768026 | 0.020159  |
| H | 5.030567  | -2.744159 | -0.110289 |
| H | 2.580547  | -2.450629 | -0.145358 |
| H | 1.195447  | 3.370108  | 0.076876  |
| H | 3.635996  | 3.017365  | 0.113070  |
| H | -3.636003 | 3.017353  | 0.113029  |
| C | -2.964356 | 2.164562  | 0.053605  |
| C | -1.602785 | 2.364262  | 0.032525  |
| C | -0.734739 | 1.246214  | -0.041183 |
| C | -1.272641 | -0.031423 | -0.111311 |
| C | -2.665886 | -0.283919 | -0.084456 |
| C | -3.532433 | 0.859769  | 0.004794  |



|   |           |           |           |
|---|-----------|-----------|-----------|
| C | -4.936783 | 0.650897  | 0.040419  |
| C | -5.462241 | -0.621214 | -0.007808 |
| C | -4.603751 | -1.745419 | -0.085508 |
| C | -3.236363 | -1.586202 | -0.120013 |
| H | -1.195458 | 3.370105  | 0.076858  |
| H | -2.580535 | -2.450639 | -0.145390 |
| H | -5.030553 | -2.744175 | -0.110345 |
| H | -6.538508 | -0.768048 | 0.020093  |
| H | -5.591325 | 1.516460  | 0.107605  |
| O | 0.000004  | -2.430803 | 0.543257  |

### Frequencies

|     |        |                    |
|-----|--------|--------------------|
| 0:  | 0.00   | cm** <sup>-1</sup> |
| 1:  | 0.00   | cm** <sup>-1</sup> |
| 2:  | 0.00   | cm** <sup>-1</sup> |
| 3:  | 0.00   | cm** <sup>-1</sup> |
| 4:  | 0.00   | cm** <sup>-1</sup> |
| 5:  | 0.00   | cm** <sup>-1</sup> |
| 6:  | 38.10  | cm** <sup>-1</sup> |
| 7:  | 67.65  | cm** <sup>-1</sup> |
| 8:  | 99.61  | cm** <sup>-1</sup> |
| 9:  | 105.93 | cm** <sup>-1</sup> |
| 10: | 115.29 | cm** <sup>-1</sup> |
| 11: | 169.61 | cm** <sup>-1</sup> |
| 12: | 183.89 | cm** <sup>-1</sup> |
| 13: | 213.92 | cm** <sup>-1</sup> |
| 14: | 214.53 | cm** <sup>-1</sup> |
| 15: | 255.91 | cm** <sup>-1</sup> |
| 16: | 275.37 | cm** <sup>-1</sup> |
| 17: | 335.75 | cm** <sup>-1</sup> |
| 18: | 337.04 | cm** <sup>-1</sup> |
| 19: | 377.39 | cm** <sup>-1</sup> |
| 20: | 413.06 | cm** <sup>-1</sup> |
| 21: | 450.30 | cm** <sup>-1</sup> |
| 22: | 451.49 | cm** <sup>-1</sup> |
| 23: | 471.72 | cm** <sup>-1</sup> |
| 24: | 484.07 | cm** <sup>-1</sup> |
| 25: | 502.21 | cm** <sup>-1</sup> |
| 26: | 527.01 | cm** <sup>-1</sup> |
| 27: | 541.17 | cm** <sup>-1</sup> |
| 28: | 549.38 | cm** <sup>-1</sup> |
| 29: | 554.48 | cm** <sup>-1</sup> |
| 30: | 582.74 | cm** <sup>-1</sup> |
| 31: | 585.62 | cm** <sup>-1</sup> |
| 32: | 646.34 | cm** <sup>-1</sup> |
| 33: | 665.00 | cm** <sup>-1</sup> |
| 34: | 671.05 | cm** <sup>-1</sup> |

|     |         |         |
|-----|---------|---------|
| 35: | 690.48  | cm** -1 |
| 36: | 698.08  | cm** -1 |
| 37: | 759.05  | cm** -1 |
| 38: | 767.51  | cm** -1 |
| 39: | 789.16  | cm** -1 |
| 40: | 789.79  | cm** -1 |
| 41: | 819.53  | cm** -1 |
| 42: | 831.19  | cm** -1 |
| 43: | 832.92  | cm** -1 |
| 44: | 838.32  | cm** -1 |
| 45: | 841.34  | cm** -1 |
| 46: | 886.75  | cm** -1 |
| 47: | 888.28  | cm** -1 |
| 48: | 932.34  | cm** -1 |
| 49: | 957.10  | cm** -1 |
| 50: | 959.67  | cm** -1 |
| 51: | 969.91  | cm** -1 |
| 52: | 972.06  | cm** -1 |
| 53: | 976.08  | cm** -1 |
| 54: | 997.75  | cm** -1 |
| 55: | 999.23  | cm** -1 |
| 56: | 1003.94 | cm** -1 |
| 57: | 1049.83 | cm** -1 |
| 58: | 1053.27 | cm** -1 |
| 59: | 1063.36 | cm** -1 |
| 60: | 1140.88 | cm** -1 |
| 61: | 1160.50 | cm** -1 |
| 62: | 1164.65 | cm** -1 |
| 63: | 1175.22 | cm** -1 |
| 64: | 1182.10 | cm** -1 |
| 65: | 1191.63 | cm** -1 |
| 66: | 1192.46 | cm** -1 |
| 67: | 1242.31 | cm** -1 |
| 68: | 1247.17 | cm** -1 |
| 69: | 1286.38 | cm** -1 |
| 70: | 1288.89 | cm** -1 |
| 71: | 1342.32 | cm** -1 |
| 72: | 1353.65 | cm** -1 |
| 73: | 1377.34 | cm** -1 |
| 74: | 1395.92 | cm** -1 |
| 75: | 1400.59 | cm** -1 |
| 76: | 1406.23 | cm** -1 |
| 77: | 1421.95 | cm** -1 |
| 78: | 1465.67 | cm** -1 |
| 79: | 1476.19 | cm** -1 |
| 80: | 1492.46 | cm** -1 |
| 81: | 1506.40 | cm** -1 |
| 82: | 1555.88 | cm** -1 |

83: 1559.59 cm\*\*-1  
84: 1601.37 cm\*\*-1  
85: 1611.05 cm\*\*-1  
86: 1632.99 cm\*\*-1  
87: 1644.13 cm\*\*-1  
88: 1671.04 cm\*\*-1  
89: 1674.68 cm\*\*-1  
90: 3175.23 cm\*\*-1  
91: 3175.26 cm\*\*-1  
92: 3178.76 cm\*\*-1  
93: 3180.30 cm\*\*-1  
94: 3187.36 cm\*\*-1  
95: 3187.39 cm\*\*-1  
96: 3198.32 cm\*\*-1  
97: 3200.42 cm\*\*-1  
98: 3200.69 cm\*\*-1  
99: 3203.34 cm\*\*-1  
100: 3212.99 cm\*\*-1  
101: 3213.05 cm\*\*-1

|                              |                        |
|------------------------------|------------------------|
| Electronic energy            | -1242.16824869 hartree |
| Total thermal correction     | 0.01574963 hartree     |
| Non-thermal (ZPE) correction | 0.25840643 hartree     |
| Total thermal energy         | -1241.89409263 hartree |
| Total Enthalpy               | -1241.89314842 hartree |
| Final Gibbs free enthalpy    | -1241.95186989 hartree |

Energy Calculations at above geometry

T<sub>2</sub>

TD-B3LYP/6-31G(d,p) -1242.073319530190 hartree

dinaphtho[1,2-b:2',1'-d]thiophene S-oxide (5) S<sub>1</sub> state

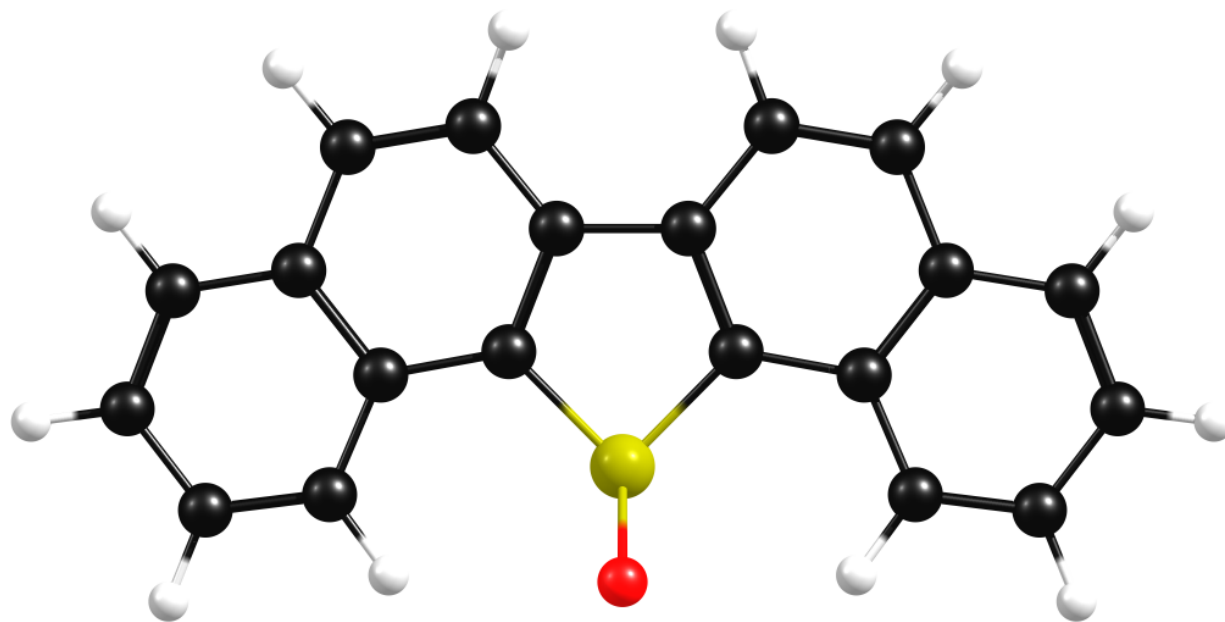

B3LYP/6-31G(d,p) optimization and Hessian

Coordinates

|   |           |           |           |
|---|-----------|-----------|-----------|
| S | 0.000006  | -1.308082 | -0.290604 |
| H | 5.570279  | 1.489960  | -0.056218 |
| C | 4.902248  | 0.632250  | -0.071213 |
| C | 5.428379  | -0.659028 | -0.146415 |
| C | 4.570212  | -1.767655 | -0.151398 |
| C | 3.193318  | -1.589185 | -0.093785 |
| C | 2.631394  | -0.284724 | -0.064629 |
| C | 3.514330  | 0.851962  | -0.019175 |
| C | 2.960400  | 2.174913  | 0.073578  |
| C | 1.603095  | 2.393280  | 0.118061  |
| C | 0.710543  | 1.298992  | 0.056830  |
| C | 1.239549  | -0.030549 | -0.081477 |
| H | 6.504510  | -0.802974 | -0.183663 |
| H | 4.981708  | -2.772342 | -0.178693 |
| H | 2.531283  | -2.446656 | -0.021971 |
| H | 1.215303  | 3.404773  | 0.197948  |
| H | 3.647949  | 3.015104  | 0.120579  |
| H | -3.647958 | 3.015091  | 0.120535  |
| C | -2.960405 | 2.174902  | 0.073543  |
| C | -1.603101 | 2.393274  | 0.118042  |
| C | -0.710544 | 1.298989  | 0.056821  |
| C | -1.239544 | -0.030553 | -0.081491 |

|   |           |           |           |
|---|-----------|-----------|-----------|
| C | -2.631389 | -0.284733 | -0.064660 |
| C | -3.514330 | 0.851950  | -0.019217 |
| C | -4.902245 | 0.632233  | -0.071271 |
| C | -5.428371 | -0.659047 | -0.146480 |
| C | -4.570200 | -1.767672 | -0.151453 |
| C | -3.193308 | -1.589196 | -0.093822 |
| H | -1.215314 | 3.404768  | 0.197934  |
| H | -2.531271 | -2.446665 | -0.022001 |
| H | -4.981692 | -2.772360 | -0.178753 |
| H | -6.504501 | -0.802997 | -0.183741 |
| H | -5.570280 | 1.489940  | -0.056284 |
| O | 0.000001  | -2.300286 | 0.880698  |

### Frequencies

|     |        |                    |
|-----|--------|--------------------|
| 0:  | 0.00   | cm** <sup>-1</sup> |
| 1:  | 0.00   | cm** <sup>-1</sup> |
| 2:  | 0.00   | cm** <sup>-1</sup> |
| 3:  | 0.00   | cm** <sup>-1</sup> |
| 4:  | 0.00   | cm** <sup>-1</sup> |
| 5:  | 0.00   | cm** <sup>-1</sup> |
| 6:  | 31.25  | cm** <sup>-1</sup> |
| 7:  | 56.74  | cm** <sup>-1</sup> |
| 8:  | 91.95  | cm** <sup>-1</sup> |
| 9:  | 104.46 | cm** <sup>-1</sup> |
| 10: | 106.79 | cm** <sup>-1</sup> |
| 11: | 146.00 | cm** <sup>-1</sup> |
| 12: | 173.82 | cm** <sup>-1</sup> |
| 13: | 200.68 | cm** <sup>-1</sup> |
| 14: | 207.55 | cm** <sup>-1</sup> |
| 15: | 247.45 | cm** <sup>-1</sup> |
| 16: | 257.05 | cm** <sup>-1</sup> |
| 17: | 294.82 | cm** <sup>-1</sup> |
| 18: | 325.97 | cm** <sup>-1</sup> |
| 19: | 363.52 | cm** <sup>-1</sup> |
| 20: | 375.45 | cm** <sup>-1</sup> |
| 21: | 398.71 | cm** <sup>-1</sup> |
| 22: | 424.94 | cm** <sup>-1</sup> |
| 23: | 468.20 | cm** <sup>-1</sup> |
| 24: | 474.64 | cm** <sup>-1</sup> |
| 25: | 493.05 | cm** <sup>-1</sup> |
| 26: | 496.40 | cm** <sup>-1</sup> |
| 27: | 515.24 | cm** <sup>-1</sup> |
| 28: | 521.73 | cm** <sup>-1</sup> |
| 29: | 531.00 | cm** <sup>-1</sup> |
| 30: | 559.03 | cm** <sup>-1</sup> |
| 31: | 569.36 | cm** <sup>-1</sup> |
| 32: | 595.04 | cm** <sup>-1</sup> |

|     |         |        |
|-----|---------|--------|
| 33: | 621.83  | cm**-1 |
| 34: | 640.94  | cm**-1 |
| 35: | 658.25  | cm**-1 |
| 36: | 683.64  | cm**-1 |
| 37: | 740.73  | cm**-1 |
| 38: | 749.69  | cm**-1 |
| 39: | 762.13  | cm**-1 |
| 40: | 765.25  | cm**-1 |
| 41: | 773.82  | cm**-1 |
| 42: | 804.90  | cm**-1 |
| 43: | 810.44  | cm**-1 |
| 44: | 825.57  | cm**-1 |
| 45: | 831.93  | cm**-1 |
| 46: | 877.71  | cm**-1 |
| 47: | 880.97  | cm**-1 |
| 48: | 921.46  | cm**-1 |
| 49: | 930.38  | cm**-1 |
| 50: | 938.72  | cm**-1 |
| 51: | 940.76  | cm**-1 |
| 52: | 947.89  | cm**-1 |
| 53: | 951.10  | cm**-1 |
| 54: | 954.80  | cm**-1 |
| 55: | 980.79  | cm**-1 |
| 56: | 983.02  | cm**-1 |
| 57: | 1002.12 | cm**-1 |
| 58: | 1056.73 | cm**-1 |
| 59: | 1063.10 | cm**-1 |
| 60: | 1102.93 | cm**-1 |
| 61: | 1144.55 | cm**-1 |
| 62: | 1145.92 | cm**-1 |
| 63: | 1165.82 | cm**-1 |
| 64: | 1166.78 | cm**-1 |
| 65: | 1186.51 | cm**-1 |
| 66: | 1189.47 | cm**-1 |
| 67: | 1241.08 | cm**-1 |
| 68: | 1243.98 | cm**-1 |
| 69: | 1289.16 | cm**-1 |
| 70: | 1292.12 | cm**-1 |
| 71: | 1306.36 | cm**-1 |
| 72: | 1353.51 | cm**-1 |
| 73: | 1367.04 | cm**-1 |
| 74: | 1370.84 | cm**-1 |
| 75: | 1383.16 | cm**-1 |
| 76: | 1392.28 | cm**-1 |
| 77: | 1428.55 | cm**-1 |
| 78: | 1459.96 | cm**-1 |
| 79: | 1469.01 | cm**-1 |
| 80: | 1471.09 | cm**-1 |

81: 1510.08 cm\*\*-1  
82: 1528.63 cm\*\*-1  
83: 1564.16 cm\*\*-1  
84: 1567.78 cm\*\*-1  
85: 1579.39 cm\*\*-1  
86: 1587.98 cm\*\*-1  
87: 1602.55 cm\*\*-1  
88: 1628.55 cm\*\*-1  
89: 1633.90 cm\*\*-1  
90: 3178.04 cm\*\*-1  
91: 3178.21 cm\*\*-1  
92: 3181.00 cm\*\*-1  
93: 3183.90 cm\*\*-1  
94: 3191.03 cm\*\*-1  
95: 3191.04 cm\*\*-1  
96: 3198.50 cm\*\*-1  
97: 3202.01 cm\*\*-1  
98: 3202.67 cm\*\*-1  
99: 3202.73 cm\*\*-1  
100: 3212.45 cm\*\*-1  
101: 3212.70 cm\*\*-1

|                              |                        |
|------------------------------|------------------------|
| Electronic energy            | -1242.05324828 hartree |
| Total thermal correction     | 0.01557150 hartree     |
| Non-thermal (ZPE) correction | 0.25471212 hartree     |
| Total thermal energy         | -1241.78296466 hartree |
| Total Enthalpy               | -1241.78202045 hartree |
| Final Gibbs free enthalpy    | -1241.83966639 hartree |

Energy Calculations at above geometry

T<sub>2</sub>

TD-B3LYP/6-31G(d,p) -1242.062499617344 hartree

dinaphtho[1,2-b:2',1'-d]thiophene *S*-oxide (5) T<sub>1</sub> state

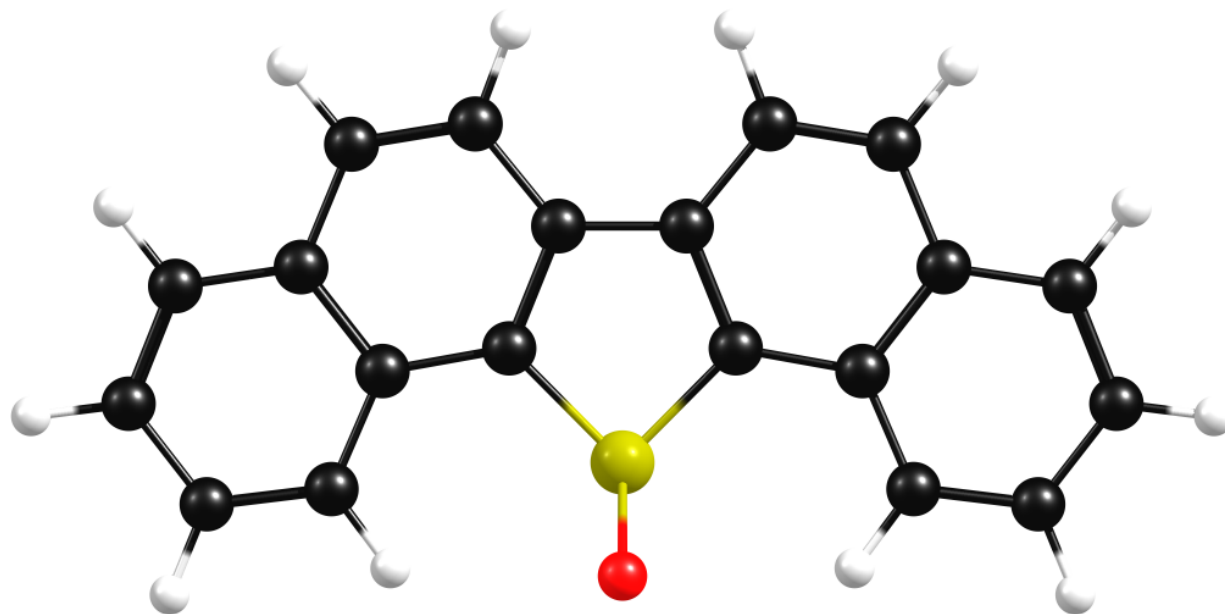

B3LYP/6-31G(d,p) optimization and Hessian

Coordinates

|   |           |           |           |
|---|-----------|-----------|-----------|
| S | -0.000008 | -1.329352 | -0.332518 |
| H | 5.563165  | 1.500827  | 0.013387  |
| C | 4.900070  | 0.640006  | -0.026961 |
| C | 5.437379  | -0.652195 | -0.091682 |
| C | 4.586511  | -1.762761 | -0.128530 |
| C | 3.206718  | -1.593364 | -0.112767 |
| C | 2.639692  | -0.292183 | -0.079001 |
| C | 3.518329  | 0.847730  | -0.012917 |
| C | 2.948720  | 2.179376  | 0.065764  |
| C | 1.601203  | 2.396870  | 0.084871  |
| C | 0.699618  | 1.293858  | 0.011173  |
| C | 1.249300  | -0.043192 | -0.107365 |
| H | 6.514911  | -0.789864 | -0.100103 |
| H | 5.003844  | -2.765220 | -0.156013 |
| H | 2.549446  | -2.456427 | -0.086119 |
| H | 1.209667  | 3.407608  | 0.156145  |
| H | 3.636093  | 3.019563  | 0.120840  |
| H | -3.635834 | 3.019606  | 0.119643  |
| C | -2.948484 | 2.179395  | 0.064871  |
| C | -1.600771 | 2.396898  | 0.084090  |
| C | -0.699347 | 1.294301  | 0.010908  |
| C | -1.249393 | -0.043755 | -0.107764 |
| C | -2.639752 | -0.292557 | -0.079079 |
| C | -3.518363 | 0.847532  | -0.013378 |



|   |           |           |           |
|---|-----------|-----------|-----------|
| C | -4.899759 | 0.639997  | -0.027319 |
| C | -5.437537 | -0.652592 | -0.091532 |
| C | -4.587053 | -1.762974 | -0.127922 |
| C | -3.206900 | -1.593576 | -0.112211 |
| H | -1.209471 | 3.407764  | 0.155012  |
| H | -2.549742 | -2.456716 | -0.085170 |
| H | -5.004284 | -2.765482 | -0.155019 |
| H | -6.515117 | -0.789840 | -0.099884 |
| H | -5.562909 | 1.500792  | 0.012649  |
| O | 0.000113  | -2.322392 | 0.820060  |

### Frequencies

|     |        |                    |
|-----|--------|--------------------|
| 0:  | 0.00   | cm** <sup>-1</sup> |
| 1:  | 0.00   | cm** <sup>-1</sup> |
| 2:  | 0.00   | cm** <sup>-1</sup> |
| 3:  | 0.00   | cm** <sup>-1</sup> |
| 4:  | 0.00   | cm** <sup>-1</sup> |
| 5:  | 0.00   | cm** <sup>-1</sup> |
| 6:  | 38.56  | cm** <sup>-1</sup> |
| 7:  | 75.61  | cm** <sup>-1</sup> |
| 8:  | 96.99  | cm** <sup>-1</sup> |
| 9:  | 106.92 | cm** <sup>-1</sup> |
| 10: | 119.35 | cm** <sup>-1</sup> |
| 11: | 176.18 | cm** <sup>-1</sup> |
| 12: | 184.37 | cm** <sup>-1</sup> |
| 13: | 203.93 | cm** <sup>-1</sup> |
| 14: | 224.42 | cm** <sup>-1</sup> |
| 15: | 253.11 | cm** <sup>-1</sup> |
| 16: | 267.54 | cm** <sup>-1</sup> |
| 17: | 312.10 | cm** <sup>-1</sup> |
| 18: | 325.38 | cm** <sup>-1</sup> |
| 19: | 375.80 | cm** <sup>-1</sup> |
| 20: | 401.17 | cm** <sup>-1</sup> |
| 21: | 419.85 | cm** <sup>-1</sup> |
| 22: | 431.35 | cm** <sup>-1</sup> |
| 23: | 465.91 | cm** <sup>-1</sup> |
| 24: | 467.18 | cm** <sup>-1</sup> |
| 25: | 497.69 | cm** <sup>-1</sup> |
| 26: | 498.76 | cm** <sup>-1</sup> |
| 27: | 527.24 | cm** <sup>-1</sup> |
| 28: | 530.39 | cm** <sup>-1</sup> |
| 29: | 536.50 | cm** <sup>-1</sup> |
| 30: | 559.89 | cm** <sup>-1</sup> |
| 31: | 586.07 | cm** <sup>-1</sup> |
| 32: | 619.02 | cm** <sup>-1</sup> |
| 33: | 643.17 | cm** <sup>-1</sup> |
| 34: | 653.70 | cm** <sup>-1</sup> |

|     |         |        |
|-----|---------|--------|
| 35: | 662.58  | cm**-1 |
| 36: | 686.28  | cm**-1 |
| 37: | 747.08  | cm**-1 |
| 38: | 760.01  | cm**-1 |
| 39: | 775.34  | cm**-1 |
| 40: | 776.42  | cm**-1 |
| 41: | 806.22  | cm**-1 |
| 42: | 817.02  | cm**-1 |
| 43: | 817.90  | cm**-1 |
| 44: | 819.97  | cm**-1 |
| 45: | 831.32  | cm**-1 |
| 46: | 886.95  | cm**-1 |
| 47: | 887.61  | cm**-1 |
| 48: | 930.60  | cm**-1 |
| 49: | 933.65  | cm**-1 |
| 50: | 943.41  | cm**-1 |
| 51: | 944.28  | cm**-1 |
| 52: | 963.09  | cm**-1 |
| 53: | 968.20  | cm**-1 |
| 54: | 983.76  | cm**-1 |
| 55: | 985.25  | cm**-1 |
| 56: | 990.68  | cm**-1 |
| 57: | 1004.14 | cm**-1 |
| 58: | 1036.30 | cm**-1 |
| 59: | 1059.39 | cm**-1 |
| 60: | 1062.09 | cm**-1 |
| 61: | 1139.05 | cm**-1 |
| 62: | 1141.12 | cm**-1 |
| 63: | 1153.53 | cm**-1 |
| 64: | 1162.84 | cm**-1 |
| 65: | 1173.18 | cm**-1 |
| 66: | 1187.63 | cm**-1 |
| 67: | 1211.75 | cm**-1 |
| 68: | 1233.78 | cm**-1 |
| 69: | 1248.37 | cm**-1 |
| 70: | 1275.36 | cm**-1 |
| 71: | 1294.84 | cm**-1 |
| 72: | 1298.95 | cm**-1 |
| 73: | 1351.97 | cm**-1 |
| 74: | 1362.28 | cm**-1 |
| 75: | 1388.78 | cm**-1 |
| 76: | 1397.63 | cm**-1 |
| 77: | 1439.21 | cm**-1 |
| 78: | 1456.73 | cm**-1 |
| 79: | 1473.97 | cm**-1 |
| 80: | 1477.51 | cm**-1 |
| 81: | 1486.30 | cm**-1 |
| 82: | 1504.39 | cm**-1 |

83: 1537.18 cm\*\*-1  
84: 1571.18 cm\*\*-1  
85: 1572.24 cm\*\*-1  
86: 1594.01 cm\*\*-1  
87: 1602.94 cm\*\*-1  
88: 1615.92 cm\*\*-1  
89: 1617.87 cm\*\*-1  
90: 3176.35 cm\*\*-1  
91: 3176.58 cm\*\*-1  
92: 3178.96 cm\*\*-1  
93: 3181.12 cm\*\*-1  
94: 3189.23 cm\*\*-1  
95: 3189.30 cm\*\*-1  
96: 3197.64 cm\*\*-1  
97: 3201.89 cm\*\*-1  
98: 3203.55 cm\*\*-1  
99: 3203.72 cm\*\*-1  
100: 3214.98 cm\*\*-1  
101: 3215.19 cm\*\*-1

|                              |                        |
|------------------------------|------------------------|
| Electronic energy            | -1242.08680353 hartree |
| Total thermal correction     | 0.01606305 hartree     |
| Non-thermal (ZPE) correction | 0.25510173 hartree     |
| Total thermal energy         | -1241.81563874 hartree |
| Total Enthalpy               | -1241.81469453 hartree |
| Final Gibbs free enthalpy    | -1241.87483412 hartree |

Energy Calculations at above geometry

T<sub>2</sub>

TD-B3LYP/6-31G(d,p) -1242.059131602872 hartree

*Calculations for Redox Potentials*

## Benzene

Charge 0 multiplicity 1

SMD-B3LYP/6-31+G(d) solvent=acetonitrile

|   |              |              |             |
|---|--------------|--------------|-------------|
| C | 0.000000000  | 1.400085000  | 0.000000000 |
| C | 1.212517000  | 0.700047000  | 0.000000000 |
| C | -1.212517000 | 0.700047000  | 0.000000000 |
| H | 2.154413000  | 1.243851000  | 0.000000000 |
| H | -2.154413000 | 1.243851000  | 0.000000000 |
| C | 1.212509000  | -0.700042000 | 0.000000000 |
| C | -1.212509000 | -0.700042000 | 0.000000000 |
| H | 2.154355000  | -1.243818000 | 0.000000000 |
| H | -2.154355000 | -1.243818000 | 0.000000000 |
| C | 0.000000000  | -1.400095000 | 0.000000000 |
| H | 0.000000000  | -2.487702000 | 0.000000000 |
| H | 0.000000000  | 2.487635000  | 0.000000000 |

|                |           |           |           |
|----------------|-----------|-----------|-----------|
| Frequencies -- | 409.7782  | 415.5598  | 618.6244  |
| Frequencies -- | 619.2990  | 687.2321  | 711.0817  |
| Frequencies -- | 866.5322  | 869.0279  | 989.5069  |
| Frequencies -- | 992.6293  | 1009.4777 | 1016.7938 |
| Frequencies -- | 1020.8952 | 1059.6523 | 1059.7315 |
| Frequencies -- | 1169.4011 | 1190.9070 | 1190.9764 |
| Frequencies -- | 1349.5236 | 1382.8354 | 1516.2483 |
| Frequencies -- | 1516.4586 | 1639.0265 | 1639.2820 |
| Frequencies -- | 3179.3616 | 3187.4418 | 3187.6026 |
| Frequencies -- | 3201.3062 | 3201.4794 | 3211.0159 |

|                                              |                             |
|----------------------------------------------|-----------------------------|
| Zero-point correction=                       | 0.100487 (Hartree/Particle) |
| Thermal correction to Energy=                | 0.104886                    |
| Thermal correction to Enthalpy=              | 0.105830                    |
| Thermal correction to Gibbs Free Energy=     | 0.074704                    |
| Sum of electronic and zero-point Energies=   | -232.167162                 |
| Sum of electronic and thermal Energies=      | -232.162763                 |
| Sum of electronic and thermal Enthalpies=    | -232.161819                 |
| Sum of electronic and thermal Free Energies= | -232.192945                 |

Charge 1 multiplicity 2

SMD-B3LYP/6-31+G(d) solvent=acetonitrile

|   |             |              |              |
|---|-------------|--------------|--------------|
| C | 0.000000000 | -1.437392000 | 0.000000000  |
| C | 0.000000000 | -0.725761000 | 1.195131000  |
| C | 0.000000000 | -0.725761000 | -1.195131000 |
| H | 0.000000000 | -1.243387000 | 2.149464000  |
| H | 0.000000000 | -1.243387000 | -2.149464000 |
| C | 0.000000000 | 0.725761000  | 1.195131000  |
| C | 0.000000000 | 0.725761000  | -1.195131000 |

|   |             |              |              |
|---|-------------|--------------|--------------|
| H | 0.000000000 | 1.243387000  | 2.149464000  |
| H | 0.000000000 | 1.243387000  | -2.149464000 |
| C | 0.000000000 | 1.437392000  | 0.000000000  |
| H | 0.000000000 | 2.522117000  | 0.000000000  |
| H | 0.000000000 | -2.522117000 | 0.000000000  |

|                |           |           |           |
|----------------|-----------|-----------|-----------|
| Frequencies -- | -331.8249 | 289.4009  | 340.3673  |
| Frequencies -- | 388.8371  | 605.6877  | 674.9401  |
| Frequencies -- | 837.2804  | 873.6286  | 909.8273  |
| Frequencies -- | 962.5705  | 979.1845  | 1005.7063 |
| Frequencies -- | 1007.4918 | 1009.6457 | 1012.5694 |
| Frequencies -- | 1083.4778 | 1181.8660 | 1193.2366 |
| Frequencies -- | 1319.7589 | 1384.8317 | 1411.7519 |
| Frequencies -- | 1465.4875 | 1532.6882 | 1587.7194 |
| Frequencies -- | 3231.2769 | 3236.7627 | 3237.4881 |
| Frequencies -- | 3243.5037 | 3248.7125 | 3252.3074 |

|                                              |                             |
|----------------------------------------------|-----------------------------|
| Zero-point correction=                       | 0.096840 (Hartree/Particle) |
| Thermal correction to Energy=                | 0.101584                    |
| Thermal correction to Enthalpy=              | 0.102529                    |
| Thermal correction to Gibbs Free Energy=     | 0.068400                    |
| Sum of electronic and zero-point Energies=   | -231.927018                 |
| Sum of electronic and thermal Energies=      | -231.922274                 |
| Sum of electronic and thermal Enthalpies=    | -231.921330                 |
| Sum of electronic and thermal Free Energies= | -231.955458                 |

Charge -1 multiplicity 2

SMD-B3LYP/6-31+G(d) solvent=acetonitrile

|   |             |              |              |
|---|-------------|--------------|--------------|
| C | 0.000000000 | 0.000000000  | 1.406317000  |
| C | 0.000000000 | 1.230181000  | 0.731717000  |
| C | 0.000000000 | -1.230181000 | 0.731717000  |
| H | 0.000000000 | 2.166433000  | 1.287228000  |
| H | 0.000000000 | -2.166433000 | 1.287228000  |
| C | 0.000000000 | 1.230181000  | -0.731717000 |
| C | 0.000000000 | -1.230181000 | -0.731717000 |
| H | 0.000000000 | 2.166433000  | -1.287228000 |
| H | 0.000000000 | -2.166433000 | -1.287228000 |
| C | 0.000000000 | 0.000000000  | -1.406317000 |
| H | 0.000000000 | 0.000000000  | -2.498905000 |
| H | 0.000000000 | 0.000000000  | 2.498905000  |

|                |           |           |           |
|----------------|-----------|-----------|-----------|
| Frequencies -- | 46.0699   | 84.5636   | 381.0710  |
| Frequencies -- | 460.7227  | 534.5246  | 538.2177  |
| Frequencies -- | 556.4992  | 611.1768  | 618.2030  |
| Frequencies -- | 637.5427  | 910.9838  | 926.0146  |
| Frequencies -- | 931.8640  | 952.0685  | 996.9096  |
| Frequencies -- | 1042.7222 | 1141.2986 | 1148.7017 |

|                |           |           |           |
|----------------|-----------|-----------|-----------|
| Frequencies -- | 1288.7336 | 1355.7158 | 1366.1427 |
| Frequencies -- | 1471.3792 | 1476.8182 | 1528.6903 |
| Frequencies -- | 3119.3952 | 3121.6113 | 3147.7158 |
| Frequencies -- | 3160.0376 | 3169.0707 | 3179.1265 |

|                                              |                             |
|----------------------------------------------|-----------------------------|
| Zero-point correction=                       | 0.090907 (Hartree/Particle) |
| Thermal correction to Energy=                | 0.097305                    |
| Thermal correction to Enthalpy=              | 0.098249                    |
| Thermal correction to Gibbs Free Energy=     | 0.061320                    |
| Sum of electronic and zero-point Energies=   | -232.207954                 |
| Sum of electronic and thermal Energies=      | -232.201555                 |
| Sum of electronic and thermal Enthalpies=    | -232.200611                 |
| Sum of electronic and thermal Free Energies= | -232.237540                 |

## Naphthalene

Charge 0 multiplicity 1

SMD-B3LYP/6-31+G(d) solvent=acetonitrile

|   |             |              |              |
|---|-------------|--------------|--------------|
| H | 0.000000000 | 1.243919000  | 2.494531000  |
| C | 0.000000000 | 1.246744000  | 1.406378000  |
| C | 0.000000000 | 2.438007000  | 0.709952000  |
| C | 0.000000000 | 2.438007000  | -0.709952000 |
| C | 0.000000000 | 1.246744000  | -1.406378000 |
| C | 0.000000000 | 0.000000000  | -0.718028000 |
| C | 0.000000000 | 0.000000000  | 0.718028000  |
| C | 0.000000000 | -1.246744000 | 1.406378000  |
| C | 0.000000000 | -2.438007000 | 0.709952000  |
| C | 0.000000000 | -2.438007000 | -0.709952000 |
| C | 0.000000000 | -1.246744000 | -1.406378000 |
| H | 0.000000000 | 3.383327000  | 1.247082000  |
| H | 0.000000000 | 3.383327000  | -1.247082000 |
| H | 0.000000000 | 1.243919000  | -2.494531000 |
| H | 0.000000000 | -1.243919000 | -2.494531000 |
| H | 0.000000000 | -3.383327000 | -1.247082000 |
| H | 0.000000000 | -3.383327000 | 1.247082000  |
| H | 0.000000000 | -1.243919000 | 2.494531000  |

|                |           |           |           |
|----------------|-----------|-----------|-----------|
| Frequencies -- | 179.4871  | 186.4270  | 361.4902  |
| Frequencies -- | 401.2306  | 477.3184  | 493.8790  |
| Frequencies -- | 515.8416  | 516.9887  | 630.5417  |
| Frequencies -- | 631.3627  | 732.3576  | 769.7859  |
| Frequencies -- | 775.6532  | 801.6907  | 804.8667  |
| Frequencies -- | 857.6402  | 899.1474  | 945.7773  |
| Frequencies -- | 967.7125  | 986.7163  | 1001.7027 |
| Frequencies -- | 1007.7461 | 1035.0440 | 1043.9893 |
| Frequencies -- | 1144.7400 | 1168.4852 | 1172.5532 |
| Frequencies -- | 1175.4267 | 1232.1785 | 1273.5988 |
| Frequencies -- | 1284.3212 | 1400.9541 | 1408.7467 |
| Frequencies -- | 1419.9244 | 1491.7453 | 1493.4544 |

|                |           |           |           |
|----------------|-----------|-----------|-----------|
| Frequencies -- | 1553.6946 | 1616.4429 | 1640.7189 |
| Frequencies -- | 1673.8564 | 3179.7572 | 3181.0548 |
| Frequencies -- | 3182.8472 | 3185.0476 | 3196.1269 |
| Frequencies -- | 3196.7015 | 3207.8104 |           |

|                                              |                             |
|----------------------------------------------|-----------------------------|
| Zero-point correction=                       | 0.147428 (Hartree/Particle) |
| Thermal correction to Energy=                | 0.154243                    |
| Thermal correction to Enthalpy=              | 0.155187                    |
| Thermal correction to Gibbs Free Energy=     | 0.117531                    |
| Sum of electronic and zero-point Energies=   | -385.772436                 |
| Sum of electronic and thermal Energies=      | -385.765622                 |
| Sum of electronic and thermal Enthalpies=    | -385.764678                 |
| Sum of electronic and thermal Free Energies= | -385.802334                 |

Charge 1 multiplicity 2

SMD-B3LYP/6-31+G(d) solvent=acetonitrile

|   |             |              |              |
|---|-------------|--------------|--------------|
| H | 0.000000000 | 1.238093000  | 2.491374000  |
| C | 0.000000000 | 1.235245000  | 1.404735000  |
| C | 0.000000000 | 2.451145000  | 0.696513000  |
| C | 0.000000000 | 2.451145000  | -0.696513000 |
| C | 0.000000000 | 1.235245000  | -1.404735000 |
| C | 0.000000000 | 0.000000000  | -0.716170000 |
| C | 0.000000000 | 0.000000000  | 0.716170000  |
| C | 0.000000000 | -1.235245000 | 1.404735000  |
| C | 0.000000000 | -2.451145000 | 0.696513000  |
| C | 0.000000000 | -2.451145000 | -0.696513000 |
| C | 0.000000000 | -1.235245000 | -1.404735000 |
| H | 0.000000000 | 3.389199000  | 1.242807000  |
| H | 0.000000000 | 3.389199000  | -1.242807000 |
| H | 0.000000000 | 1.238093000  | -2.491374000 |
| H | 0.000000000 | -1.238093000 | -2.491374000 |
| H | 0.000000000 | -3.389199000 | -1.242807000 |
| H | 0.000000000 | -3.389199000 | 1.242807000  |
| H | 0.000000000 | -1.238093000 | 2.491374000  |

|                |           |           |           |
|----------------|-----------|-----------|-----------|
| Frequencies -- | 146.3046  | 176.5095  | 355.1879  |
| Frequencies -- | 378.1804  | 426.1977  | 433.9010  |
| Frequencies -- | 474.0994  | 512.9954  | 557.5090  |
| Frequencies -- | 604.4171  | 725.1879  | 748.7720  |
| Frequencies -- | 771.3298  | 774.8724  | 808.6317  |
| Frequencies -- | 877.0342  | 934.9670  | 939.7784  |
| Frequencies -- | 982.3060  | 1004.7347 | 1021.8322 |
| Frequencies -- | 1025.4607 | 1039.1938 | 1062.4895 |
| Frequencies -- | 1118.5042 | 1120.4248 | 1182.2581 |
| Frequencies -- | 1186.8619 | 1233.1387 | 1263.6799 |
| Frequencies -- | 1299.7048 | 1422.3738 | 1425.3344 |
| Frequencies -- | 1431.5455 | 1469.9243 | 1497.4547 |
| Frequencies -- | 1513.5827 | 1551.1613 | 1569.3707 |
| Frequencies -- | 1631.7492 | 3215.1913 | 3216.7656 |
| Frequencies -- | 3217.9014 | 3219.6978 | 3227.9936 |



Frequencies -- 3228.2780 3237.7398 3238.3691

Zero-point correction= 0.146944 (Hartree/Particle)  
Thermal correction to Energy= 0.154044  
Thermal correction to Enthalpy= 0.154988  
Thermal correction to Gibbs Free Energy= 0.116097  
Sum of electronic and zero-point Energies= -385.562287  
Sum of electronic and thermal Energies= -385.555187  
Sum of electronic and thermal Enthalpies= -385.554242  
Sum of electronic and thermal Free Energies= -385.593134

Charge -1 multiplicity 2

SMD-B3LYP/6-31+G(d) solvent=acetonitrile

|   |            |             |             |
|---|------------|-------------|-------------|
| H | 0.00000000 | 1.25606000  | 2.49643000  |
| C | 0.00000000 | 1.25333100  | 1.40674400  |
| C | 0.00000000 | 2.47672500  | 0.69752700  |
| C | 0.00000000 | 2.47672500  | -0.69752700 |
| C | 0.00000000 | 1.25333100  | -1.40674400 |
| C | 0.00000000 | 0.00000000  | -0.72745000 |
| C | 0.00000000 | 0.00000000  | 0.72745000  |
| C | 0.00000000 | -1.25333100 | 1.40674400  |
| C | 0.00000000 | -2.47672500 | 0.69752700  |
| C | 0.00000000 | -2.47672500 | -0.69752700 |
| C | 0.00000000 | -1.25333100 | -1.40674400 |
| H | 0.00000000 | 3.41815200  | 1.24536000  |
| H | 0.00000000 | 3.41815200  | -1.24536000 |
| H | 0.00000000 | 1.25606000  | -2.49643000 |
| H | 0.00000000 | -1.25606000 | -2.49643000 |
| H | 0.00000000 | -3.41815200 | -1.24536000 |
| H | 0.00000000 | -3.41815200 | 1.24536000  |
| H | 0.00000000 | -1.25606000 | 2.49643000  |

|                |           |           |           |
|----------------|-----------|-----------|-----------|
| Frequencies -- | 158.1512  | 187.9081  | 295.5008  |
| Frequencies -- | 361.8278  | 482.0022  | 508.5978  |
| Frequencies -- | 509.8695  | 514.2735  | 587.9666  |
| Frequencies -- | 606.7362  | 658.9045  | 718.1069  |
| Frequencies -- | 718.6763  | 732.4088  | 746.7213  |
| Frequencies -- | 779.7898  | 792.7845  | 803.9701  |
| Frequencies -- | 804.6131  | 894.4677  | 899.2477  |
| Frequencies -- | 908.5834  | 1007.8466 | 1051.0470 |
| Frequencies -- | 1061.9030 | 1102.7459 | 1153.6694 |
| Frequencies -- | 1160.4758 | 1204.7334 | 1223.9536 |
| Frequencies -- | 1264.6765 | 1374.3336 | 1402.8716 |
| Frequencies -- | 1405.2204 | 1412.9554 | 1447.6577 |
| Frequencies -- | 1475.2386 | 1523.0765 | 1533.1119 |
| Frequencies -- | 1596.5144 | 3143.6739 | 3145.9548 |
| Frequencies -- | 3147.4572 | 3151.6203 | 3160.5353 |
| Frequencies -- | 3161.9731 | 3177.1364 | 3179.2369 |

|                                              |                             |
|----------------------------------------------|-----------------------------|
| Zero-point correction=                       | 0.142023 (Hartree/Particle) |
| Thermal correction to Energy=                | 0.149323                    |
| Thermal correction to Enthalpy=              | 0.150267                    |
| Thermal correction to Gibbs Free Energy=     | 0.111157                    |
| Sum of electronic and zero-point Energies=   | -385.839543                 |
| Sum of electronic and thermal Energies=      | -385.832242                 |
| Sum of electronic and thermal Enthalpies=    | -385.831298                 |
| Sum of electronic and thermal Free Energies= | -385.870408                 |

## Chrysene

Charge 0 multiplicity 1

SMD-B3LYP/6-31+G(d) solvent=acetonitrile

|   |              |              |             |
|---|--------------|--------------|-------------|
| C | 1.258721000  | 1.437146000  | 0.000000000 |
| C | 2.487395000  | 0.705708000  | 0.000000000 |
| C | -0.001537000 | 0.709934000  | 0.000000000 |
| C | 2.447014000  | -0.723107000 | 0.000000000 |
| C | 0.001537000  | -0.709934000 | 0.000000000 |
| C | 1.258721000  | -1.399075000 | 0.000000000 |
| C | -1.258721000 | 1.399075000  | 0.000000000 |
| C | -2.447014000 | 0.723107000  | 0.000000000 |
| C | -2.487395000 | -0.705708000 | 0.000000000 |
| C | -1.258721000 | -1.437146000 | 0.000000000 |
| C | -3.724756000 | -1.400688000 | 0.000000000 |
| C | -3.763282000 | -2.782036000 | 0.000000000 |
| C | -1.334653000 | -2.855918000 | 0.000000000 |
| C | -2.553894000 | -3.512118000 | 0.000000000 |
| C | 1.334653000  | 2.855918000  | 0.000000000 |
| C | 3.724756000  | 1.400688000  | 0.000000000 |
| H | 3.387154000  | -1.270341000 | 0.000000000 |
| H | 1.279197000  | -2.483165000 | 0.000000000 |
| H | -1.279197000 | 2.483165000  | 0.000000000 |
| H | -3.387154000 | 1.270341000  | 0.000000000 |
| H | -4.645903000 | -0.821742000 | 0.000000000 |
| H | -4.715924000 | -3.305772000 | 0.000000000 |
| H | -0.428575000 | -3.451581000 | 0.000000000 |
| H | -2.578181000 | -4.599150000 | 0.000000000 |
| C | 2.553894000  | 3.512118000  | 0.000000000 |
| C | 3.763282000  | 2.782036000  | 0.000000000 |
| H | 0.428575000  | 3.451581000  | 0.000000000 |
| H | 4.645903000  | 0.821742000  | 0.000000000 |
| H | 2.578181000  | 4.599150000  | 0.000000000 |
| H | 4.715924000  | 3.305772000  | 0.000000000 |

|                |          |          |          |
|----------------|----------|----------|----------|
| Frequencies -- | 57.1936  | 90.7959  | 150.2217 |
| Frequencies -- | 179.7679 | 191.6234 | 242.7825 |
| Frequencies -- | 294.8805 | 299.7292 | 382.7548 |
| Frequencies -- | 399.4319 | 442.9837 | 485.1963 |

|                |           |           |           |
|----------------|-----------|-----------|-----------|
| Frequencies -- | 486.3254  | 489.7749  | 524.3346  |
| Frequencies -- | 543.4714  | 571.1310  | 575.2526  |
| Frequencies -- | 577.6420  | 595.7946  | 687.9239  |
| Frequencies -- | 688.2408  | 691.4128  | 749.9201  |
| Frequencies -- | 755.6529  | 776.0850  | 779.6948  |
| Frequencies -- | 791.5348  | 833.2725  | 841.9869  |
| Frequencies -- | 861.6819  | 882.2938  | 886.6597  |
| Frequencies -- | 890.3790  | 891.1931  | 970.8015  |
| Frequencies -- | 972.3558  | 988.7175  | 991.5857  |
| Frequencies -- | 1004.8660 | 1005.4848 | 1035.2862 |
| Frequencies -- | 1057.6978 | 1063.3318 | 1100.3604 |
| Frequencies -- | 1156.4761 | 1173.8235 | 1179.3989 |
| Frequencies -- | 1184.4170 | 1207.7159 | 1217.7615 |
| Frequencies -- | 1255.3834 | 1268.6077 | 1281.0208 |
| Frequencies -- | 1283.4005 | 1327.2799 | 1362.0706 |
| Frequencies -- | 1393.4579 | 1398.4482 | 1403.1858 |
| Frequencies -- | 1459.8611 | 1467.2970 | 1471.2149 |
| Frequencies -- | 1489.7770 | 1528.2853 | 1560.4010 |
| Frequencies -- | 1566.7020 | 1609.8993 | 1640.0981 |
| Frequencies -- | 1649.6611 | 1661.1187 | 1664.2725 |
| Frequencies -- | 3183.7421 | 3183.7984 | 3187.5894 |
| Frequencies -- | 3187.9713 | 3193.5268 | 3193.7193 |
| Frequencies -- | 3207.0266 | 3207.2712 | 3217.7434 |
| Frequencies -- | 3217.9093 | 3236.7298 | 3237.1839 |

|                                              |                             |
|----------------------------------------------|-----------------------------|
| Zero-point correction=                       | 0.241702 (Hartree/Particle) |
| Thermal correction to Energy=                | 0.253759                    |
| Thermal correction to Enthalpy=              | 0.254704                    |
| Thermal correction to Gibbs Free Energy=     | 0.204186                    |
| Sum of electronic and zero-point Energies=   | -692.984031                 |
| Sum of electronic and thermal Energies=      | -692.971973                 |
| Sum of electronic and thermal Enthalpies=    | -692.971029                 |
| Sum of electronic and thermal Free Energies= | -693.021547                 |

Charge 1 multiplicity 2

SMD-B3LYP/6-31+G(d) solvent=acetonitrile

|   |              |              |             |
|---|--------------|--------------|-------------|
| C | 1.250793000  | 1.465358000  | 0.000000000 |
| C | 2.481262000  | 0.739652000  | 0.000000000 |
| C | -0.009403000 | 0.723800000  | 0.000000000 |
| C | 2.447560000  | -0.678747000 | 0.000000000 |
| C | 0.009403000  | -0.723800000 | 0.000000000 |
| C | 1.250793000  | -1.383379000 | 0.000000000 |
| C | -1.250793000 | 1.383379000  | 0.000000000 |
| C | -2.447560000 | 0.678747000  | 0.000000000 |
| C | -2.481262000 | -0.739652000 | 0.000000000 |
| C | -1.250793000 | -1.465358000 | 0.000000000 |
| C | -3.718316000 | -1.429319000 | 0.000000000 |
| C | -3.752133000 | -2.818080000 | 0.000000000 |

|   |              |              |             |
|---|--------------|--------------|-------------|
| C | -1.316626000 | -2.870417000 | 0.000000000 |
| C | -2.547104000 | -3.534260000 | 0.000000000 |
| C | 1.316626000  | 2.870417000  | 0.000000000 |
| C | 3.718316000  | 1.429319000  | 0.000000000 |
| H | 3.387441000  | -1.224554000 | 0.000000000 |
| H | 1.297732000  | -2.465602000 | 0.000000000 |
| H | -1.297732000 | 2.465602000  | 0.000000000 |
| H | -3.387441000 | 1.224554000  | 0.000000000 |
| H | -4.638812000 | -0.851601000 | 0.000000000 |
| H | -4.702227000 | -3.344060000 | 0.000000000 |
| H | -0.413006000 | -3.468616000 | 0.000000000 |
| H | -2.561413000 | -4.620622000 | 0.000000000 |
| C | 2.547104000  | 3.534260000  | 0.000000000 |
| C | 3.752133000  | 2.818080000  | 0.000000000 |
| H | 0.413006000  | 3.468616000  | 0.000000000 |
| H | 4.638812000  | 0.851601000  | 0.000000000 |
| H | 2.561413000  | 4.620622000  | 0.000000000 |
| H | 4.702227000  | 3.344060000  | 0.000000000 |

|                |           |           |           |
|----------------|-----------|-----------|-----------|
| Frequencies -- | 54.3195   | 77.6361   | 146.5563  |
| Frequencies -- | 168.3212  | 193.3001  | 226.4026  |
| Frequencies -- | 290.4032  | 294.1155  | 376.2536  |
| Frequencies -- | 383.7856  | 424.1050  | 460.6469  |
| Frequencies -- | 477.2644  | 478.2566  | 500.9007  |
| Frequencies -- | 523.5743  | 541.1846  | 556.3161  |
| Frequencies -- | 561.8927  | 571.6541  | 685.3627  |
| Frequencies -- | 685.8186  | 686.8102  | 738.5119  |
| Frequencies -- | 763.0466  | 771.6399  | 774.1235  |
| Frequencies -- | 779.3763  | 853.1167  | 861.3892  |
| Frequencies -- | 863.2636  | 887.2913  | 893.6568  |
| Frequencies -- | 899.9395  | 906.9875  | 984.1097  |
| Frequencies -- | 985.4781  | 1001.8224 | 1004.4899 |
| Frequencies -- | 1018.4943 | 1019.3740 | 1034.9062 |
| Frequencies -- | 1067.4457 | 1072.1267 | 1110.4096 |
| Frequencies -- | 1149.3563 | 1162.7625 | 1172.6333 |
| Frequencies -- | 1185.4883 | 1200.8053 | 1252.5042 |
| Frequencies -- | 1261.3931 | 1278.6820 | 1293.5850 |
| Frequencies -- | 1300.8782 | 1324.7077 | 1361.4203 |
| Frequencies -- | 1362.2374 | 1386.8823 | 1406.5887 |
| Frequencies -- | 1464.4200 | 1465.4438 | 1470.2367 |
| Frequencies -- | 1479.9988 | 1534.1459 | 1536.0607 |
| Frequencies -- | 1548.7813 | 1581.4595 | 1587.4024 |
| Frequencies -- | 1611.5622 | 1619.7633 | 1637.5667 |
| Frequencies -- | 3206.7471 | 3206.7538 | 3211.9369 |
| Frequencies -- | 3212.4995 | 3213.7205 | 3213.9565 |
| Frequencies -- | 3224.8693 | 3225.2231 | 3232.5522 |
| Frequencies -- | 3232.6110 | 3252.8799 | 3253.0689 |

|                                            |                             |
|--------------------------------------------|-----------------------------|
| Zero-point correction=                     | 0.241439 (Hartree/Particle) |
| Thermal correction to Energy=              | 0.253729                    |
| Thermal correction to Enthalpy=            | 0.254673                    |
| Thermal correction to Gibbs Free Energy=   | 0.202912                    |
| Sum of electronic and zero-point Energies= | -692.783394                 |
| Sum of electronic and thermal Energies=    | -692.771104                 |

Sum of electronic and thermal Enthalpies= -692.770160  
Sum of electronic and thermal Free Energies= -692.821921

Charge -1 multiplicity 2

SMD-B3LYP/6-31+G(d) solvent=acetonitrile

|   |              |              |             |
|---|--------------|--------------|-------------|
| C | 1.258604000  | 1.468451000  | 0.000000000 |
| C | 2.499747000  | 0.736693000  | 0.000000000 |
| C | -0.012376000 | 0.728527000  | 0.000000000 |
| C | 2.469184000  | -0.692106000 | 0.000000000 |
| C | 0.012376000  | -0.728527000 | 0.000000000 |
| C | 1.258604000  | -1.382418000 | 0.000000000 |
| C | -1.258604000 | 1.382418000  | 0.000000000 |
| C | -2.469184000 | 0.692106000  | 0.000000000 |
| C | -2.499747000 | -0.736693000 | 0.000000000 |
| C | -1.258604000 | -1.468451000 | 0.000000000 |
| C | -3.725207000 | -1.455232000 | 0.000000000 |
| C | -3.756908000 | -2.849048000 | 0.000000000 |
| C | -1.331100000 | -2.879809000 | 0.000000000 |
| C | -2.552673000 | -3.566343000 | 0.000000000 |
| C | 1.331100000  | 2.879809000  | 0.000000000 |
| C | 3.725207000  | 1.455232000  | 0.000000000 |
| H | 3.410598000  | -1.238246000 | 0.000000000 |
| H | 1.297099000  | -2.468413000 | 0.000000000 |
| H | -1.297099000 | 2.468413000  | 0.000000000 |
| H | -3.410598000 | 1.238246000  | 0.000000000 |
| H | -4.655976000 | -0.889637000 | 0.000000000 |
| H | -4.710737000 | -3.372992000 | 0.000000000 |
| H | -0.417760000 | -3.467187000 | 0.000000000 |
| H | -2.558561000 | -4.654241000 | 0.000000000 |
| C | 2.552673000  | 3.566343000  | 0.000000000 |
| C | 3.756908000  | 2.849048000  | 0.000000000 |
| H | 0.417760000  | 3.467187000  | 0.000000000 |
| H | 4.655976000  | 0.889637000  | 0.000000000 |

|                |           |           |           |
|----------------|-----------|-----------|-----------|
| Frequencies -- | 31.9179   | 90.5074   | 128.1269  |
| Frequencies -- | 182.6442  | 186.6103  | 227.4737  |
| Frequencies -- | 289.1913  | 295.2445  | 349.2648  |
| Frequencies -- | 371.7391  | 427.9271  | 475.2949  |
| Frequencies -- | 476.7287  | 493.5912  | 525.0731  |
| Frequencies -- | 539.1123  | 549.4998  | 562.0844  |
| Frequencies -- | 570.1943  | 572.7783  | 660.6260  |
| Frequencies -- | 674.6412  | 677.3628  | 701.3106  |
| Frequencies -- | 710.2251  | 748.0776  | 752.0155  |
| Frequencies -- | 762.9731  | 766.4092  | 771.9417  |
| Frequencies -- | 845.8342  | 846.6514  | 847.8340  |
| Frequencies -- | 872.7290  | 885.4175  | 900.1309  |
| Frequencies -- | 900.6833  | 909.0679  | 910.2131  |
| Frequencies -- | 958.9210  | 959.2356  | 1014.6587 |
| Frequencies -- | 1057.3423 | 1063.2737 | 1093.5540 |

|                |           |           |           |
|----------------|-----------|-----------|-----------|
| Frequencies -- | 1111.5399 | 1132.0658 | 1135.8604 |
| Frequencies -- | 1168.9953 | 1176.0069 | 1216.5575 |
| Frequencies -- | 1224.6323 | 1255.1430 | 1265.2935 |
| Frequencies -- | 1270.6351 | 1293.3693 | 1303.7861 |
| Frequencies -- | 1311.4820 | 1349.3170 | 1372.9142 |
| Frequencies -- | 1444.0601 | 1448.0775 | 1450.2420 |
| Frequencies -- | 1463.7419 | 1491.8861 | 1515.1898 |
| Frequencies -- | 1523.6326 | 1550.0822 | 1569.0881 |
| Frequencies -- | 1585.3321 | 1595.4556 | 1619.8552 |
| Frequencies -- | 3160.9260 | 3161.1939 | 3165.4157 |
| Frequencies -- | 3165.7968 | 3174.7279 | 3175.5551 |
| Frequencies -- | 3184.3957 | 3185.3189 | 3192.0899 |
| Frequencies -- | 3192.4825 | 3208.2149 | 3208.9706 |

|                                              |                             |
|----------------------------------------------|-----------------------------|
| Zero-point correction=                       | 0.236145 (Hartree/Particle) |
| Thermal correction to Energy=                | 0.248721                    |
| Thermal correction to Enthalpy=              | 0.249665                    |
| Thermal correction to Gibbs Free Energy=     | 0.197130                    |
| Sum of electronic and zero-point Energies=   | -693.059379                 |
| Sum of electronic and thermal Energies=      | -693.046802                 |
| Sum of electronic and thermal Enthalpies=    | -693.045858                 |
| Sum of electronic and thermal Free Energies= | -693.098393                 |

## Pyrimidine

Charge 0 multiplicity 1

SMD-B3LYP/6-31+G(d) solvent=acetonitrile

|   |             |              |              |
|---|-------------|--------------|--------------|
| N | 0.000000000 | 1.195227000  | -0.716529000 |
| N | 0.000000000 | -1.195227000 | -0.716529000 |
| C | 0.000000000 | 0.000000000  | -1.319160000 |
| C | 0.000000000 | 1.185927000  | 0.626351000  |
| C | 0.000000000 | 0.000000000  | 1.358229000  |
| C | 0.000000000 | -1.185927000 | 0.626351000  |
| H | 0.000000000 | 0.000000000  | -2.406122000 |
| H | 0.000000000 | 2.154358000  | 1.121715000  |
| H | 0.000000000 | 0.000000000  | 2.443467000  |
| H | 0.000000000 | -2.154358000 | 1.121715000  |

|                |           |           |           |
|----------------|-----------|-----------|-----------|
| Frequencies -- | 352.0457  | 407.5571  | 632.9315  |
| Frequencies -- | 688.5240  | 729.7075  | 824.5215  |
| Frequencies -- | 972.8020  | 1012.2727 | 1014.4423 |
| Frequencies -- | 1027.4241 | 1079.1502 | 1094.5858 |
| Frequencies -- | 1157.3733 | 1225.0574 | 1267.1551 |
| Frequencies -- | 1393.3103 | 1440.8879 | 1497.5692 |
| Frequencies -- | 1616.6301 | 1621.1917 | 3198.0108 |
| Frequencies -- | 3200.5959 | 3209.0271 | 3235.4090 |

|                                              |                             |
|----------------------------------------------|-----------------------------|
| Zero-point correction=                       | 0.077226 (Hartree/Particle) |
| Thermal correction to Energy=                | 0.081422                    |
| Thermal correction to Enthalpy=              | 0.082366                    |
| Thermal correction to Gibbs Free Energy=     | 0.050510                    |
| Sum of electronic and zero-point Energies=   | -264.272049                 |
| Sum of electronic and thermal Energies=      | -264.267853                 |
| Sum of electronic and thermal Enthalpies=    | -264.266909                 |
| Sum of electronic and thermal Free Energies= | -264.298765                 |

Charge 1 multiplicity 2

SMD-B3LYP/6-31+G(d) solvent=acetonitrile

|   |             |              |              |
|---|-------------|--------------|--------------|
| N | 0.000000000 | 1.113065000  | 0.687402000  |
| N | 0.000000000 | -1.113065000 | 0.687402000  |
| C | 0.000000000 | 0.000000000  | 1.410414000  |
| C | 0.000000000 | 1.174887000  | -0.632269000 |
| C | 0.000000000 | 0.000000000  | -1.390323000 |
| C | 0.000000000 | -1.174887000 | -0.632269000 |
| H | 0.000000000 | 0.000000000  | 2.492180000  |
| H | 0.000000000 | 2.164415000  | -1.087514000 |
| H | 0.000000000 | 0.000000000  | -2.474100000 |
| H | 0.000000000 | -2.164415000 | -1.087514000 |

|                |           |           |           |
|----------------|-----------|-----------|-----------|
| Frequencies -- | 369.4716  | 447.1430  | 497.0739  |
| Frequencies -- | 566.1348  | 652.7146  | 831.9342  |
| Frequencies -- | 909.6801  | 937.6002  | 967.5842  |
| Frequencies -- | 1006.0799 | 1045.6469 | 1062.1023 |
| Frequencies -- | 1160.2249 | 1171.5801 | 1223.3155 |
| Frequencies -- | 1332.6669 | 1444.8368 | 1463.4569 |
| Frequencies -- | 1501.6555 | 1623.3561 | 3202.3266 |
| Frequencies -- | 3202.8769 | 3272.7439 | 3308.0069 |

|                                              |             |                    |
|----------------------------------------------|-------------|--------------------|
| Zero-point correction=                       | 0.075636    | (Hartree/Particle) |
| Thermal correction to Energy=                | 0.080003    |                    |
| Thermal correction to Enthalpy=              | 0.080947    |                    |
| Thermal correction to Gibbs Free Energy=     | 0.048231    |                    |
| Sum of electronic and zero-point Energies=   | -264.024377 |                    |
| Sum of electronic and thermal Energies=      | -264.020009 |                    |
| Sum of electronic and thermal Enthalpies=    | -264.019065 |                    |
| Sum of electronic and thermal Free Energies= | -264.051781 |                    |

Charge -1 multiplicity 2

SMD-B3LYP/6-31+G(d) solvent=acetonitrile

|   |             |              |              |
|---|-------------|--------------|--------------|
| N | 0.000000000 | 1.209997000  | -0.752177000 |
| N | 0.000000000 | -1.209997000 | -0.752177000 |
| C | 0.000000000 | 0.000000000  | -1.319692000 |
| C | 0.000000000 | 1.203265000  | 0.660013000  |
| C | 0.000000000 | 0.000000000  | 1.363828000  |
| C | 0.000000000 | -1.203265000 | 0.660013000  |
| H | 0.000000000 | 0.000000000  | -2.413637000 |
| H | 0.000000000 | 2.171992000  | 1.152486000  |
| H | 0.000000000 | 0.000000000  | 2.454170000  |
| H | 0.000000000 | -2.171992000 | 1.152486000  |

|                |           |           |           |
|----------------|-----------|-----------|-----------|
| Frequencies -- | 226.7615  | 386.4862  | 557.6109  |
| Frequencies -- | 571.2509  | 586.3829  | 658.0274  |
| Frequencies -- | 681.3935  | 918.0754  | 928.1660  |
| Frequencies -- | 958.3569  | 967.1460  | 1035.1266 |
| Frequencies -- | 1058.7343 | 1120.6306 | 1283.4075 |
| Frequencies -- | 1346.7986 | 1369.8535 | 1401.2866 |

|                |           |           |           |
|----------------|-----------|-----------|-----------|
| Frequencies -- | 1472.8843 | 1514.3800 | 3103.7382 |
| Frequencies -- | 3153.0429 | 3183.4103 | 3194.4711 |

|                                              |                             |
|----------------------------------------------|-----------------------------|
| Zero-point correction=                       | 0.072166 (Hartree/Particle) |
| Thermal correction to Energy=                | 0.076937                    |
| Thermal correction to Enthalpy=              | 0.077882                    |
| Thermal correction to Gibbs Free Energy=     | 0.044394                    |
| Sum of electronic and zero-point Energies=   | -264.345347                 |
| Sum of electronic and thermal Energies=      | -264.340576                 |
| Sum of electronic and thermal Enthalpies=    | -264.339632                 |
| Sum of electronic and thermal Free Energies= | -264.373120                 |

## Quinoline

Charge 0 multiplicity 1

SMD-B3LYP/6-31+G(d) solvent=acetonitrile

|   |              |              |              |
|---|--------------|--------------|--------------|
| C | 1.231524000  | 1.410304000  | -0.000033000 |
| C | -0.014922000 | 0.725055000  | -0.000010000 |
| C | -0.026256000 | -0.708058000 | 0.000025000  |
| C | 1.211130000  | -1.407986000 | -0.000008000 |
| C | 2.404698000  | -0.715171000 | -0.000002000 |
| C | 2.416819000  | 0.704421000  | 0.000004000  |
| C | -1.267765000 | 1.394050000  | 0.000029000  |
| C | -2.428471000 | 0.653506000  | -0.000052000 |
| N | -1.192308000 | -1.427967000 | 0.000070000  |
| H | 1.231954000  | 2.498173000  | -0.000028000 |
| H | 1.190578000  | -2.494811000 | -0.000024000 |
| H | 3.346656000  | -1.257895000 | -0.000032000 |
| H | 3.366603000  | 1.232952000  | 0.000050000  |
| H | -1.293320000 | 2.481552000  | 0.000085000  |
| H | -3.405367000 | 1.128152000  | 0.000230000  |
| H | -3.244816000 | -1.359331000 | -0.000098000 |
| C | -2.334446000 | -0.761625000 | -0.000065000 |

|                |           |           |           |
|----------------|-----------|-----------|-----------|
| Frequencies -- | 175.5279  | 183.6697  | 382.2218  |
| Frequencies -- | 402.4494  | 477.3642  | 492.7188  |
| Frequencies -- | 526.3636  | 528.8584  | 623.3862  |
| Frequencies -- | 639.3360  | 749.3089  | 769.9672  |
| Frequencies -- | 792.7213  | 824.3233  | 826.4259  |
| Frequencies -- | 883.5447  | 950.0343  | 977.0942  |
| Frequencies -- | 980.0510  | 1007.9128 | 1011.7097 |
| Frequencies -- | 1037.7683 | 1059.1010 | 1142.5487 |
| Frequencies -- | 1163.7383 | 1169.8663 | 1237.9694 |
| Frequencies -- | 1259.5654 | 1287.0278 | 1364.7868 |
| Frequencies -- | 1400.9887 | 1426.6652 | 1469.5684 |
| Frequencies -- | 1501.8221 | 1545.4971 | 1611.1442 |
| Frequencies -- | 1640.3795 | 1664.5726 | 3176.1112 |
| Frequencies -- | 3186.9684 | 3194.2693 | 3195.2590 |
| Frequencies -- | 3204.7190 | 3213.7211 | 3218.8081 |

|                                            |                             |
|--------------------------------------------|-----------------------------|
| Zero-point correction=                     | 0.135728 (Hartree/Particle) |
| Thermal correction to Energy=              | 0.142412                    |
| Thermal correction to Enthalpy=            | 0.143357                    |
| Thermal correction to Gibbs Free Energy=   | 0.104574                    |
| Sum of electronic and zero-point Energies= | -401.824770                 |



|                                              |             |
|----------------------------------------------|-------------|
| Sum of electronic and thermal Energies=      | -401.818086 |
| Sum of electronic and thermal Enthalpies=    | -401.817142 |
| Sum of electronic and thermal Free Energies= | -401.855924 |

Charge 1 multiplicity 2

SMD-B3LYP/6-31+G(d) solvent=acetonitrile

|   |              |              |              |
|---|--------------|--------------|--------------|
| C | 1.214290000  | 1.406466000  | -0.000170000 |
| C | -0.031039000 | 0.726160000  | -0.000127000 |
| C | -0.038389000 | -0.700687000 | -0.000006000 |
| C | 1.209062000  | -1.399523000 | -0.000010000 |
| C | 2.432224000  | -0.697240000 | 0.000085000  |
| C | 2.437009000  | 0.690313000  | 0.000108000  |
| C | -1.270439000 | 1.396766000  | -0.000011000 |
| C | -2.440337000 | 0.636045000  | 0.000125000  |
| N | -1.175240000 | -1.427301000 | 0.000006000  |
| H | 1.225209000  | 2.493283000  | -0.000401000 |
| H | 1.193711000  | -2.485492000 | -0.000083000 |
| H | 3.365103000  | -1.251551000 | 0.000174000  |
| H | 3.372960000  | 1.239316000  | 0.000347000  |
| H | -1.304796000 | 2.482610000  | -0.000048000 |
| H | -3.416113000 | 1.110371000  | 0.001073000  |
| H | -3.239606000 | -1.372955000 | -0.000255000 |
| C | -2.340680000 | -0.762379000 | -0.000134000 |

|                |           |           |           |
|----------------|-----------|-----------|-----------|
| Frequencies -- | 150.8505  | 168.3159  | 369.6786  |
| Frequencies -- | 371.7610  | 413.6254  | 430.6612  |
| Frequencies -- | 470.9094  | 506.3057  | 519.1852  |
| Frequencies -- | 604.0180  | 726.5150  | 763.4326  |
| Frequencies -- | 773.5949  | 812.6962  | 826.6435  |
| Frequencies -- | 897.2566  | 939.7603  | 984.3062  |
| Frequencies -- | 993.8298  | 1021.7731 | 1026.9920 |
| Frequencies -- | 1045.2039 | 1068.7663 | 1097.5912 |
| Frequencies -- | 1140.0121 | 1182.9885 | 1234.2121 |
| Frequencies -- | 1254.9499 | 1271.1516 | 1346.0885 |
| Frequencies -- | 1422.3399 | 1431.1567 | 1457.0571 |
| Frequencies -- | 1464.1867 | 1488.4908 | 1550.7721 |
| Frequencies -- | 1568.6292 | 1628.2498 | 3216.9103 |
| Frequencies -- | 3223.1571 | 3225.4647 | 3232.8564 |
| Frequencies -- | 3239.4613 | 3242.8122 | 3247.1104 |

|                                              |                             |
|----------------------------------------------|-----------------------------|
| Zero-point correction=                       | 0.134530 (Hartree/Particle) |
| Thermal correction to Energy=                | 0.141588                    |
| Thermal correction to Enthalpy=              | 0.142533                    |
| Thermal correction to Gibbs Free Energy=     | 0.102383                    |
| Sum of electronic and zero-point Energies=   | -401.598368                 |
| Sum of electronic and thermal Energies=      | -401.591309                 |
| Sum of electronic and thermal Enthalpies=    | -401.590365                 |
| Sum of electronic and thermal Free Energies= | -401.630515                 |

Charge -1 multiplicity 2

SMD-B3LYP/6-31+G(d) solvent=acetonitrile

|   |              |             |              |
|---|--------------|-------------|--------------|
| C | -1.239957000 | 1.401904000 | -0.000186000 |
|---|--------------|-------------|--------------|

|   |              |              |              |
|---|--------------|--------------|--------------|
| C | 0.014094000  | 0.735728000  | -0.000081000 |
| C | 0.028539000  | -0.716737000 | -0.000122000 |
| C | -1.212395000 | -1.399658000 | 0.000229000  |
| C | -2.439024000 | -0.707289000 | 0.000221000  |
| C | -2.452514000 | 0.690413000  | -0.000106000 |
| C | 1.270818000  | 1.408861000  | 0.000122000  |
| C | 2.458520000  | 0.640784000  | 0.000318000  |
| N | 1.199076000  | -1.442030000 | -0.000335000 |
| H | -1.249577000 | 2.491661000  | -0.000291000 |
| H | -1.196034000 | -2.488525000 | 0.000390000  |
| H | -3.373530000 | -1.265585000 | 0.000414000  |
| H | -3.397264000 | 1.231281000  | -0.000230000 |
| H | 1.302343000  | 2.496816000  | 0.000162000  |
| H | 3.434229000  | 1.123558000  | 0.000521000  |
| H | 3.279706000  | -1.350325000 | 0.000278000  |
| C | 2.373019000  | -0.744785000 | -0.000212000 |

|                |           |           |           |
|----------------|-----------|-----------|-----------|
| Frequencies -- | 155.9159  | 187.8659  | 310.3089  |
| Frequencies -- | 383.6065  | 480.6179  | 516.0465  |
| Frequencies -- | 516.0827  | 523.0379  | 595.6580  |
| Frequencies -- | 600.3816  | 675.3236  | 731.9161  |
| Frequencies -- | 744.8677  | 747.1914  | 776.2011  |
| Frequencies -- | 813.2420  | 814.8670  | 855.4792  |
| Frequencies -- | 902.9520  | 913.5124  | 928.3404  |
| Frequencies -- | 1026.5672 | 1064.6120 | 1081.3757 |
| Frequencies -- | 1110.1807 | 1161.4558 | 1193.0087 |
| Frequencies -- | 1229.0356 | 1271.3663 | 1302.9285 |
| Frequencies -- | 1362.6338 | 1403.5513 | 1433.9536 |
| Frequencies -- | 1454.7554 | 1471.1963 | 1532.3991 |
| Frequencies -- | 1551.4125 | 1597.3033 | 3141.3104 |
| Frequencies -- | 3151.1015 | 3159.5043 | 3164.5832 |
| Frequencies -- | 3171.0696 | 3182.4655 | 3186.9515 |

|                                              |                             |
|----------------------------------------------|-----------------------------|
| Zero-point correction=                       | 0.131173 (Hartree/Particle) |
| Thermal correction to Energy=                | 0.138244                    |
| Thermal correction to Enthalpy=              | 0.139188                    |
| Thermal correction to Gibbs Free Energy=     | 0.099110                    |
| Sum of electronic and zero-point Energies=   | -401.905488                 |
| Sum of electronic and thermal Energies=      | -401.898416                 |
| Sum of electronic and thermal Enthalpies=    | -401.897472                 |
| Sum of electronic and thermal Free Energies= | -401.937551                 |

## Pyridine

Charge 0 multiplicity 1

SMD-B3LYP/6-31+G(d) solvent=acetonitrile

|   |              |              |              |
|---|--------------|--------------|--------------|
| C | 0.000950000  | 1.386190000  | 0.000008000  |
| C | -1.200482000 | 0.674287000  | 0.000004000  |
| C | -1.149141000 | -0.722004000 | -0.000098000 |
| N | -0.001044000 | -1.420621000 | 0.000083000  |
| C | 1.147909000  | -0.723817000 | -0.000042000 |
| C | 1.201685000  | 0.672255000  | -0.000004000 |
| H | 0.002539000  | 2.473269000  | 0.000092000  |
| H | -2.160035000 | 1.183750000  | 0.000111000  |
| H | -2.067249000 | -1.306168000 | 0.000025000  |

|   |             |              |              |
|---|-------------|--------------|--------------|
| H | 2.065275000 | -1.309503000 | 0.000064000  |
| H | 2.161254000 | 1.181547000  | -0.000079000 |

|                |           |           |           |
|----------------|-----------|-----------|-----------|
| Frequencies -- | 385.7442  | 416.6276  | 614.1705  |
| Frequencies -- | 664.3685  | 714.1422  | 759.3619  |
| Frequencies -- | 897.7606  | 964.6580  | 1004.2025 |
| Frequencies -- | 1011.1962 | 1024.9558 | 1044.3434 |
| Frequencies -- | 1081.3805 | 1090.5700 | 1167.4107 |
| Frequencies -- | 1236.6570 | 1303.4258 | 1391.1526 |
| Frequencies -- | 1475.3449 | 1520.0443 | 1624.1651 |
| Frequencies -- | 1635.6658 | 3184.0944 | 3186.9266 |
| Frequencies -- | 3202.2324 | 3214.0625 | 3221.6993 |

|                                              |                             |
|----------------------------------------------|-----------------------------|
| Zero-point correction=                       | 0.088931 (Hartree/Particle) |
| Thermal correction to Energy=                | 0.093213                    |
| Thermal correction to Enthalpy=              | 0.094157                    |
| Thermal correction to Gibbs Free Energy=     | 0.061520                    |
| Sum of electronic and zero-point Energies=   | -248.217755                 |
| Sum of electronic and thermal Energies=      | -248.213474                 |
| Sum of electronic and thermal Enthalpies=    | -248.212529                 |
| Sum of electronic and thermal Free Energies= | -248.245167                 |

Charge 1 multiplicity 2

SMD-B3LYP/6-31+G(d) solvent=acetonitrile

|   |              |             |              |
|---|--------------|-------------|--------------|
| C | -0.664923324 | 1.507824804 | -1.147990687 |
| C | -0.625160534 | 1.378500355 | -2.535544683 |
| C | -0.730213682 | 2.532554935 | -3.313828093 |
| N | -0.872853062 | 3.739016347 | -2.848587708 |
| C | -0.904152321 | 3.870852495 | -1.470567750 |
| C | -0.807642107 | 2.782527916 | -0.601753274 |
| H | -0.586436367 | 0.634662555 | -0.506625605 |
| H | -0.515375669 | 0.407573001 | -3.008381305 |
| H | -0.702592054 | 2.465093061 | -4.400109265 |
| H | -1.016336583 | 4.879068112 | -1.075299735 |
| H | -0.843839516 | 2.934799647 | 0.472411602  |

|                |           |           |           |
|----------------|-----------|-----------|-----------|
| Frequencies -- | 297.8456  | 389.7748  | 543.0014  |
| Frequencies -- | 567.0264  | 588.7866  | 625.4156  |
| Frequencies -- | 730.1169  | 916.5734  | 964.5177  |
| Frequencies -- | 970.0080  | 1000.9283 | 1028.9211 |
| Frequencies -- | 1070.9546 | 1076.2392 | 1157.7133 |
| Frequencies -- | 1162.4747 | 1272.3379 | 1320.0998 |
| Frequencies -- | 1447.7816 | 1472.2215 | 1532.7192 |
| Frequencies -- | 1622.4617 | 3218.4090 | 3222.8014 |
| Frequencies -- | 3229.9662 | 3240.5015 | 3243.6108 |

|                                            |                             |
|--------------------------------------------|-----------------------------|
| Zero-point correction=                     | 0.086373 (Hartree/Particle) |
| Thermal correction to Energy=              | 0.091075                    |
| Thermal correction to Enthalpy=            | 0.092019                    |
| Thermal correction to Gibbs Free Energy=   | 0.058089                    |
| Sum of electronic and zero-point Energies= | -247.973278                 |
| Sum of electronic and thermal Energies=    | -247.968576                 |

Sum of electronic and thermal Enthalpies= -247.967632  
Sum of electronic and thermal Free Energies= -248.001562

Charge -1 multiplicity 2

SMD-B3LYP/6-31+G(d) solvent=acetonitrile

|   |              |             |              |
|---|--------------|-------------|--------------|
| C | -0.664923324 | 1.507824804 | -1.147990687 |
| C | -0.625160534 | 1.378500355 | -2.535544683 |
| C | -0.730213682 | 2.532554935 | -3.313828093 |
| N | -0.872853062 | 3.739016347 | -2.848587708 |
| C | -0.904152321 | 3.870852495 | -1.470567750 |
| C | -0.807642107 | 2.782527916 | -0.601753274 |
| H | -0.586436367 | 0.634662555 | -0.506625605 |
| H | -0.515375669 | 0.407573001 | -3.008381305 |
| H | -0.702592054 | 2.465093061 | -4.400109265 |
| H | -1.016336583 | 4.879068112 | -1.075299735 |
| H | -0.843839516 | 2.934799647 | 0.472411602  |

|                |           |           |           |
|----------------|-----------|-----------|-----------|
| Frequencies -- | 212.8039  | 418.0987  | 419.0986  |
| Frequencies -- | 572.0990  | 640.0567  | 652.5090  |
| Frequencies -- | 704.4321  | 782.4739  | 868.2522  |
| Frequencies -- | 902.3554  | 912.6062  | 934.3315  |
| Frequencies -- | 972.8611  | 1031.2589 | 1047.9416 |
| Frequencies -- | 1209.4496 | 1215.6941 | 1347.7433 |
| Frequencies -- | 1381.5073 | 1459.7177 | 1497.7576 |
| Frequencies -- | 1623.5049 | 3124.2552 | 3127.8852 |
| Frequencies -- | 3153.6996 | 3154.1207 | 3198.1108 |

Zero-point correction= 0.083300 (Hartree/Particle)  
Thermal correction to Energy= 0.088280  
Thermal correction to Enthalpy= 0.089225  
Thermal correction to Gibbs Free Energy= 0.054733  
Sum of electronic and zero-point Energies= -248.276292  
Sum of electronic and thermal Energies= -248.271312  
Sum of electronic and thermal Enthalpies= -248.270368  
Sum of electronic and thermal Free Energies= -248.304860

## Pyrole

Charge 0 multiplicity 1

SMD-B3LYP/6-31+G(d) solvent=acetonitrile

|   |             |              |              |
|---|-------------|--------------|--------------|
| C | 0.000000000 | 0.714833000  | -0.987381000 |
| C | 0.000000000 | 1.126271000  | 0.334650000  |
| N | 0.000000000 | 0.000000000  | 1.121946000  |
| C | 0.000000000 | -1.126271000 | 0.334650000  |
| C | 0.000000000 | -0.714833000 | -0.987381000 |
| H | 0.000000000 | 1.365366000  | -1.853688000 |
| H | 0.000000000 | 2.113822000  | 0.775913000  |
| H | 0.000000000 | -2.113822000 | 0.775913000  |
| H | 0.000000000 | -1.365366000 | -1.853688000 |
| H | 0.000000000 | 0.000000000  | 2.134699000  |

|                |          |          |          |
|----------------|----------|----------|----------|
| Frequencies -- | 510.8027 | 623.7195 | 642.5736 |
|----------------|----------|----------|----------|

|                |           |           |           |
|----------------|-----------|-----------|-----------|
| Frequencies -- | 702.7963  | 728.4066  | 838.8210  |
| Frequencies -- | 875.9610  | 877.5829  | 895.9354  |
| Frequencies -- | 1028.7091 | 1065.6960 | 1088.6026 |
| Frequencies -- | 1151.7089 | 1171.3696 | 1314.3545 |
| Frequencies -- | 1421.8071 | 1452.5246 | 1502.7052 |
| Frequencies -- | 1571.2410 | 3239.7639 | 3252.0033 |
| Frequencies -- | 3276.8543 | 3280.1091 | 3626.4377 |

|                                              |                             |
|----------------------------------------------|-----------------------------|
| Zero-point correction=                       | 0.082334 (Hartree/Particle) |
| Thermal correction to Energy=                | 0.086281                    |
| Thermal correction to Enthalpy=              | 0.087225                    |
| Thermal correction to Gibbs Free Energy=     | 0.056601                    |
| Sum of electronic and zero-point Energies=   | -210.108057                 |
| Sum of electronic and thermal Energies=      | -210.104110                 |
| Sum of electronic and thermal Enthalpies=    | -210.103166                 |
| Sum of electronic and thermal Free Energies= | -210.133790                 |

Charge 1 multiplicity 2

SMD-B3LYP/6-31+G(d) solvent=acetonitrile

|   |             |              |              |
|---|-------------|--------------|--------------|
| C | 0.000000000 | 0.687090000  | -1.017527000 |
| C | 0.000000000 | 1.108752000  | 0.354408000  |
| N | 0.000000000 | 0.000000000  | 1.139167000  |
| C | 0.000000000 | -1.108752000 | 0.354408000  |
| C | 0.000000000 | -0.687090000 | -1.017527000 |
| H | 0.000000000 | 1.357841000  | -1.866088000 |
| H | 0.000000000 | 2.104014000  | 0.779586000  |
| H | 0.000000000 | -2.104014000 | 0.779586000  |
| H | 0.000000000 | -1.357841000 | -1.866088000 |
| H | 0.000000000 | 0.000000000  | 2.156270000  |

|                |           |           |           |
|----------------|-----------|-----------|-----------|
| Frequencies -- | 481.4945  | 512.6685  | 629.4660  |
| Frequencies -- | 736.8693  | 751.2720  | 866.7420  |
| Frequencies -- | 892.9907  | 901.7117  | 951.5997  |
| Frequencies -- | 1002.8945 | 1045.0320 | 1077.9159 |
| Frequencies -- | 1088.8493 | 1179.5787 | 1271.4113 |
| Frequencies -- | 1326.9311 | 1475.1481 | 1484.5063 |
| Frequencies -- | 1557.9966 | 3283.1491 | 3293.9362 |
| Frequencies -- | 3298.8190 | 3304.2455 | 3583.3259 |

|                                              |                             |
|----------------------------------------------|-----------------------------|
| Zero-point correction=                       | 0.082011 (Hartree/Particle) |
| Thermal correction to Energy=                | 0.086024                    |
| Thermal correction to Enthalpy=              | 0.086968                    |
| Thermal correction to Gibbs Free Energy=     | 0.055578                    |
| Sum of electronic and zero-point Energies=   | -209.904409                 |
| Sum of electronic and thermal Energies=      | -209.900396                 |
| Sum of electronic and thermal Enthalpies=    | -209.899452                 |
| Sum of electronic and thermal Free Energies= | -209.930841                 |

Charge -1 multiplicity 2

SMD-B3LYP/6-31+G(d) solvent=acetonitrile

|   |             |             |              |
|---|-------------|-------------|--------------|
| C | 0.000000000 | 0.714721000 | -0.991185000 |
| C | 0.000000000 | 1.119649000 | 0.336259000  |

|   |             |              |              |
|---|-------------|--------------|--------------|
| N | 0.000000000 | 0.000000000  | 1.118307000  |
| C | 0.000000000 | -1.119649000 | 0.336259000  |
| C | 0.000000000 | -0.714721000 | -0.991185000 |
| H | 0.000000000 | 1.368948000  | -1.857964000 |
| H | 0.000000000 | 2.104411000  | 0.789873000  |
| H | 0.000000000 | -2.104411000 | 0.789873000  |
| H | 0.000000000 | -1.368948000 | -1.857964000 |
| H | 0.000000000 | 0.000000000  | 2.167145000  |

|                |           |           |           |
|----------------|-----------|-----------|-----------|
| Frequencies -- | 498.3911  | 606.8782  | 642.1498  |
| Frequencies -- | 698.3493  | 713.9140  | 831.9143  |
| Frequencies -- | 863.8334  | 869.8225  | 882.9917  |
| Frequencies -- | 1002.2353 | 1015.8818 | 1065.5734 |
| Frequencies -- | 1074.2750 | 1171.3923 | 1298.7636 |
| Frequencies -- | 1417.4384 | 1436.6523 | 1498.0724 |
| Frequencies -- | 1545.4726 | 2695.3405 | 3197.9597 |
| Frequencies -- | 3209.5306 | 3216.5321 | 3225.1821 |

|                                              |                             |
|----------------------------------------------|-----------------------------|
| Zero-point correction=                       | 0.079004 (Hartree/Particle) |
| Thermal correction to Energy=                | 0.083006                    |
| Thermal correction to Enthalpy=              | 0.083950                    |
| Thermal correction to Gibbs Free Energy=     | 0.052598                    |
| Sum of electronic and zero-point Energies=   | -210.121506                 |
| Sum of electronic and thermal Energies=      | -210.117504                 |
| Sum of electronic and thermal Enthalpies=    | -210.116560                 |
| Sum of electronic and thermal Free Energies= | -210.147912                 |

## Thiophene

Charge 0 multiplicity 1

SMD-B3LYP/6-31+G(d) solvent=acetonitrile

|   |             |              |              |
|---|-------------|--------------|--------------|
| C | 0.000000000 | 0.716317000  | -1.275196000 |
| C | 0.000000000 | 1.246432000  | -0.011103000 |
| S | 0.000000000 | 0.000000000  | 1.201456000  |
| C | 0.000000000 | -1.246432000 | -0.011103000 |
| C | 0.000000000 | -0.716317000 | -1.275196000 |
| H | 0.000000000 | 1.322171000  | -2.176071000 |
| H | 0.000000000 | 2.289486000  | 0.282215000  |
| H | 0.000000000 | -2.289486000 | 0.282215000  |
| H | 0.000000000 | -1.322171000 | -2.176071000 |

|                |           |           |           |
|----------------|-----------|-----------|-----------|
| Frequencies -- | 453.9050  | 570.0957  | 608.7824  |
| Frequencies -- | 697.3997  | 726.3703  | 740.0162  |
| Frequencies -- | 830.6085  | 878.9032  | 890.2359  |
| Frequencies -- | 926.4327  | 1052.3747 | 1104.0739 |
| Frequencies -- | 1109.1450 | 1280.3549 | 1399.6012 |
| Frequencies -- | 1456.1698 | 1560.1511 | 3217.7752 |
| Frequencies -- | 3229.9554 | 3267.5014 | 3269.1808 |

|                                          |                             |
|------------------------------------------|-----------------------------|
| Zero-point correction=                   | 0.066680 (Hartree/Particle) |
| Thermal correction to Energy=            | 0.070760                    |
| Thermal correction to Enthalpy=          | 0.071704                    |
| Thermal correction to Gibbs Free Energy= | 0.040087                    |

|                                              |             |
|----------------------------------------------|-------------|
| Sum of electronic and zero-point Energies=   | -552.951960 |
| Sum of electronic and thermal Energies=      | -552.947879 |
| Sum of electronic and thermal Enthalpies=    | -552.946935 |
| Sum of electronic and thermal Free Energies= | -552.978553 |

Charge 1 multiplicity 2

SMD-B3LYP/6-31+G(d) solvent=acetonitrile

|   |             |              |              |
|---|-------------|--------------|--------------|
| C | 0.000000000 | 0.690651000  | -1.315364000 |
| C | 0.000000000 | 1.225015000  | -0.000041000 |
| S | 0.000000000 | 0.000000000  | 1.227145000  |
| C | 0.000000000 | -1.225015000 | -0.000041000 |
| C | 0.000000000 | -0.690651000 | -1.315364000 |
| H | 0.000000000 | 1.322475000  | -2.196167000 |
| H | 0.000000000 | 2.276196000  | 0.271432000  |
| H | 0.000000000 | -2.276196000 | 0.271432000  |
| H | 0.000000000 | -1.322475000 | -2.196167000 |

|                |           |           |           |
|----------------|-----------|-----------|-----------|
| Frequencies -- | 362.9843  | 460.4253  | 549.0398  |
| Frequencies -- | 613.9797  | 713.1400  | 816.1888  |
| Frequencies -- | 849.7125  | 851.6258  | 884.4706  |
| Frequencies -- | 969.7679  | 1025.7957 | 1081.7784 |
| Frequencies -- | 1115.8481 | 1257.1585 | 1365.5283 |
| Frequencies -- | 1366.6360 | 1522.9220 | 3259.6292 |
| Frequencies -- | 3268.2182 | 3271.6999 | 3277.7891 |

|                                              |                             |
|----------------------------------------------|-----------------------------|
| Zero-point correction=                       | 0.065803 (Hartree/Particle) |
| Thermal correction to Energy=                | 0.070109                    |
| Thermal correction to Enthalpy=              | 0.071053                    |
| Thermal correction to Gibbs Free Energy=     | 0.038400                    |
| Sum of electronic and zero-point Energies=   | -552.723423                 |
| Sum of electronic and thermal Energies=      | -552.719117                 |
| Sum of electronic and thermal Enthalpies=    | -552.718173                 |
| Sum of electronic and thermal Free Energies= | -552.750827                 |

Charge -1 multiplicity 2

SMD-B3LYP/6-31+G(d) solvent=acetonitrile

|   |              |              |              |
|---|--------------|--------------|--------------|
| C | -0.128490000 | 1.295250000  | 0.699899000  |
| C | -0.128490000 | 0.001383000  | 1.286624000  |
| S | 0.190234000  | -1.219040000 | 0.000000000  |
| C | -0.128490000 | 0.001383000  | -1.286624000 |
| C | -0.128490000 | 1.295250000  | -0.699899000 |
| H | -0.199927000 | 2.201311000  | 1.299944000  |
| H | 0.219933000  | -0.228793000 | 2.290425000  |
| H | 0.219933000  | -0.228793000 | -2.290425000 |
| H | -0.199927000 | 2.201311000  | -1.299944000 |

|                |           |           |           |
|----------------|-----------|-----------|-----------|
| Frequencies -- | 269.5392  | 288.8198  | 480.3788  |
| Frequencies -- | 507.7665  | 575.2265  | 656.6338  |
| Frequencies -- | 690.7371  | 745.1831  | 791.2511  |
| Frequencies -- | 850.4130  | 1030.2363 | 1046.0885 |
| Frequencies -- | 1087.7345 | 1222.1815 | 1303.7159 |
| Frequencies -- | 1391.3604 | 1470.8144 | 3158.9328 |

|                                              |           |           |                             |
|----------------------------------------------|-----------|-----------|-----------------------------|
| Frequencies --                               | 3171.8815 | 3182.1757 | 3189.8711                   |
| Zero-point correction=                       |           |           | 0.061763 (Hartree/Particle) |
| Thermal correction to Energy=                |           |           | 0.066740                    |
| Thermal correction to Enthalpy=              |           |           | 0.067684                    |
| Thermal correction to Gibbs Free Energy=     |           |           | 0.033217                    |
| Sum of electronic and zero-point Energies=   |           |           | -552.996935                 |
| Sum of electronic and thermal Energies=      |           |           | -552.991958                 |
| Sum of electronic and thermal Enthalpies=    |           |           | -552.991014                 |
| Sum of electronic and thermal Free Energies= |           |           | -553.025482                 |

### Dibenzothiophene S-oxide

Charge 0 multiplicity 1

SMD-B3LYP/6-31+G(d) solvent=acetonitrile

|   |              |              |              |
|---|--------------|--------------|--------------|
| S | -0.000186000 | 1.765101000  | -0.344149000 |
| C | 1.610688000  | -1.894035000 | 0.097842000  |
| C | 0.736127000  | -0.808117000 | -0.015295000 |
| C | 2.991007000  | -1.663321000 | 0.097731000  |
| H | 3.672445000  | -2.504804000 | 0.190568000  |
| C | 1.273207000  | 0.484944000  | -0.139926000 |
| C | 3.506254000  | -0.365914000 | -0.020619000 |
| H | 4.580703000  | -0.204779000 | -0.016522000 |
| C | 2.641501000  | 0.728835000  | -0.152191000 |
| H | 3.035533000  | 1.736494000  | -0.255347000 |
| H | 1.224282000  | -2.905685000 | 0.187841000  |
| C | -2.990765000 | -1.663641000 | 0.097433000  |
| C | -3.506106000 | -0.366237000 | -0.020372000 |
| C | -1.610405000 | -1.894236000 | 0.097280000  |
| H | -4.580555000 | -0.205106000 | -0.015840000 |
| H | -1.223866000 | -2.905904000 | 0.186512000  |
| C | -2.641462000 | 0.728600000  | -0.151954000 |
| C | -0.735990000 | -0.808199000 | -0.015417000 |
| H | -3.035653000 | 1.736214000  | -0.254991000 |
| C | -1.273116000 | 0.484895000  | -0.139930000 |
| H | -3.672120000 | -2.505208000 | 0.190076000  |
| O | -0.000429000 | 2.716966000  | 0.860825000  |

|                |           |           |           |
|----------------|-----------|-----------|-----------|
| Frequencies -- | 77.6518   | 85.1165   | 121.4508  |
| Frequencies -- | 178.2918  | 193.6185  | 282.5932  |
| Frequencies -- | 339.6205  | 394.9898  | 396.9583  |
| Frequencies -- | 426.0507  | 449.7883  | 478.3989  |
| Frequencies -- | 490.7074  | 558.3971  | 565.3901  |
| Frequencies -- | 624.1192  | 696.0320  | 698.3116  |
| Frequencies -- | 724.4894  | 732.6580  | 767.1985  |
| Frequencies -- | 772.6153  | 782.6559  | 879.5200  |
| Frequencies -- | 887.4484  | 962.6003  | 968.5693  |
| Frequencies -- | 979.9069  | 1006.5792 | 1010.8854 |
| Frequencies -- | 1015.6203 | 1040.4333 | 1043.1461 |
| Frequencies -- | 1071.4947 | 1080.1154 | 1134.4505 |
| Frequencies -- | 1146.3962 | 1181.0674 | 1181.1236 |
| Frequencies -- | 1244.6268 | 1300.4811 | 1318.7115 |
| Frequencies -- | 1340.9440 | 1381.7064 | 1466.1315 |
| Frequencies -- | 1480.2598 | 1499.5025 | 1511.4464 |
| Frequencies -- | 1617.0709 | 1625.9911 | 1633.4646 |



|                |           |           |           |
|----------------|-----------|-----------|-----------|
| Frequencies -- | 1635.2204 | 3188.0589 | 3195.7374 |
| Frequencies -- | 3199.1209 | 3201.8350 | 3206.8507 |
| Frequencies -- | 3208.9626 | 3217.4405 | 3218.2326 |

|                                              |                             |
|----------------------------------------------|-----------------------------|
| Zero-point correction=                       | 0.164297 (Hartree/Particle) |
| Thermal correction to Energy=                | 0.174822                    |
| Thermal correction to Enthalpy=              | 0.175766                    |
| Thermal correction to Gibbs Free Energy=     | 0.127613                    |
| Sum of electronic and zero-point Energies=   | -935.344154                 |
| Sum of electronic and thermal Energies=      | -935.333629                 |
| Sum of electronic and thermal Enthalpies=    | -935.332685                 |
| Sum of electronic and thermal Free Energies= | -935.380839                 |

Charge 1 multiplicity 2

SMD-B3LYP/6-31+G(d) solvent=acetonitrile

|   |              |              |              |
|---|--------------|--------------|--------------|
| S | 0.000046000  | 1.652146000  | -0.273780000 |
| C | 1.614779000  | -1.895512000 | 0.053086000  |
| C | 0.737625000  | -0.817510000 | -0.026617000 |
| C | 2.999994000  | -1.655142000 | 0.074381000  |
| H | 3.678568000  | -2.501147000 | 0.131435000  |
| C | 1.300610000  | 0.476422000  | -0.067289000 |
| C | 3.523556000  | -0.357165000 | 0.020946000  |
| H | 4.597282000  | -0.200510000 | 0.039889000  |
| C | 2.668644000  | 0.744366000  | -0.072987000 |
| H | 3.052954000  | 1.757714000  | -0.138897000 |
| H | 1.234974000  | -2.910797000 | 0.112342000  |
| C | -3.000115000 | -1.655040000 | 0.073948000  |
| C | -3.523586000 | -0.357027000 | 0.021200000  |
| C | -1.614904000 | -1.895483000 | 0.052411000  |
| H | -4.597294000 | -0.200275000 | 0.040381000  |
| H | -1.235167000 | -2.910840000 | 0.110820000  |
| C | -2.668603000 | 0.744512000  | -0.072500000 |
| C | -0.737699000 | -0.817480000 | -0.026680000 |
| H | -3.052891000 | 1.757885000  | -0.138137000 |
| C | -1.300622000 | 0.476472000  | -0.067015000 |
| H | -3.678722000 | -2.501044000 | 0.130634000  |
| O | 0.000186000  | 2.915775000  | 0.539340000  |

|                |           |           |           |
|----------------|-----------|-----------|-----------|
| Frequencies -- | 29.7036   | 97.2373   | 129.2552  |
| Frequencies -- | 190.2137  | 191.4469  | 262.5689  |
| Frequencies -- | 331.1014  | 386.5963  | 396.2125  |
| Frequencies -- | 419.5087  | 433.4167  | 436.2175  |
| Frequencies -- | 497.0668  | 504.9212  | 546.1482  |
| Frequencies -- | 596.6984  | 688.5813  | 699.2477  |
| Frequencies -- | 699.6937  | 718.1195  | 765.8473  |
| Frequencies -- | 766.9840  | 769.5398  | 863.6021  |
| Frequencies -- | 888.9712  | 972.2915  | 980.6553  |
| Frequencies -- | 983.2399  | 1011.4686 | 1016.8092 |
| Frequencies -- | 1021.5619 | 1025.9864 | 1043.8338 |
| Frequencies -- | 1054.6723 | 1087.1646 | 1131.6362 |
| Frequencies -- | 1146.4952 | 1174.1127 | 1187.3173 |
| Frequencies -- | 1235.3196 | 1289.2305 | 1316.7408 |
| Frequencies -- | 1325.3431 | 1392.8996 | 1453.4531 |
| Frequencies -- | 1458.8519 | 1484.3861 | 1512.5141 |
| Frequencies -- | 1568.2803 | 1592.6120 | 1601.0883 |

|                |           |           |           |
|----------------|-----------|-----------|-----------|
| Frequencies -- | 1606.5392 | 3201.1970 | 3216.1105 |
| Frequencies -- | 3219.9091 | 3222.6756 | 3226.0734 |
| Frequencies -- | 3227.7376 | 3235.4229 | 3235.9189 |

|                                              |                             |
|----------------------------------------------|-----------------------------|
| Zero-point correction=                       | 0.163501 (Hartree/Particle) |
| Thermal correction to Energy=                | 0.174259                    |
| Thermal correction to Enthalpy=              | 0.175203                    |
| Thermal correction to Gibbs Free Energy=     | 0.125401                    |
| Sum of electronic and zero-point Energies=   | -935.111026                 |
| Sum of electronic and thermal Energies=      | -935.100267                 |
| Sum of electronic and thermal Enthalpies=    | -935.099323                 |
| Sum of electronic and thermal Free Energies= | -935.149125                 |

Charge -1 multiplicity 2

SMD-B3LYP/6-31+G(d) solvent=acetonitrile

|   |              |              |              |
|---|--------------|--------------|--------------|
| C | 3.508237000  | -0.343447000 | -0.163803000 |
| C | 2.625530000  | 0.725681000  | -0.312643000 |
| C | 3.002794000  | -1.647588000 | 0.099349000  |
| H | 3.007159000  | 1.728578000  | -0.498357000 |
| H | 3.697762000  | -2.475244000 | 0.224205000  |
| C | 1.246730000  | 0.498209000  | -0.213622000 |
| C | 1.635882000  | -1.880371000 | 0.197074000  |
| H | 1.270195000  | -2.887443000 | 0.391018000  |
| C | 0.716330000  | -0.816488000 | 0.037435000  |
| H | 4.580224000  | -0.180869000 | -0.244041000 |
| C | -1.636089000 | -1.880192000 | 0.197377000  |
| C | -0.716457000 | -0.816421000 | 0.037681000  |
| C | -3.002978000 | -1.647365000 | 0.099491000  |
| H | -3.698021000 | -2.474949000 | 0.224393000  |
| C | -1.246756000 | 0.498435000  | -0.213318000 |
| C | -3.508333000 | -0.343191000 | -0.163918000 |
| H | -4.580304000 | -0.180649000 | -0.244444000 |
| C | -2.625586000 | 0.725876000  | -0.312647000 |
| H | -3.007139000 | 1.728799000  | -0.498407000 |
| H | -1.270508000 | -2.887264000 | 0.391549000  |
| S | -0.000039000 | 1.778997000  | -0.261276000 |
| O | 0.000680000  | 2.590781000  | 1.087970000  |

|                |           |           |           |
|----------------|-----------|-----------|-----------|
| Frequencies -- | 87.9597   | 121.4383  | 126.3644  |
| Frequencies -- | 155.2121  | 205.3386  | 279.1892  |
| Frequencies -- | 301.5507  | 398.8087  | 407.2539  |
| Frequencies -- | 418.7900  | 422.8549  | 451.2266  |
| Frequencies -- | 488.2832  | 520.1755  | 549.5554  |
| Frequencies -- | 615.2821  | 679.6275  | 687.8600  |
| Frequencies -- | 692.2566  | 709.6564  | 718.3184  |
| Frequencies -- | 737.3616  | 763.9474  | 817.7486  |
| Frequencies -- | 827.1563  | 833.2763  | 937.9996  |
| Frequencies -- | 939.6559  | 957.4345  | 958.2664  |
| Frequencies -- | 981.4245  | 1017.3115 | 1019.3577 |
| Frequencies -- | 1032.2629 | 1062.2236 | 1135.5647 |
| Frequencies -- | 1146.7101 | 1169.7846 | 1170.4430 |
| Frequencies -- | 1201.7102 | 1283.9421 | 1346.4399 |
| Frequencies -- | 1352.2534 | 1376.5601 | 1443.3529 |
| Frequencies -- | 1462.1796 | 1471.9967 | 1499.8728 |
| Frequencies -- | 1532.4467 | 1532.9742 | 1564.6790 |

|                |           |           |           |
|----------------|-----------|-----------|-----------|
| Frequencies -- | 1594.2498 | 3165.6454 | 3167.0908 |
| Frequencies -- | 3170.4197 | 3171.5787 | 3183.4471 |
| Frequencies -- | 3184.0251 | 3197.7849 | 3198.2415 |

|                                              |                             |
|----------------------------------------------|-----------------------------|
| Zero-point correction=                       | 0.160943 (Hartree/Particle) |
| Thermal correction to Energy=                | 0.171698                    |
| Thermal correction to Enthalpy=              | 0.172642                    |
| Thermal correction to Gibbs Free Energy=     | 0.123778                    |
| Sum of electronic and zero-point Energies=   | -935.430589                 |
| Sum of electronic and thermal Energies=      | -935.419834                 |
| Sum of electronic and thermal Enthalpies=    | -935.418890                 |
| Sum of electronic and thermal Free Energies= | -935.467753                 |

**Benzo[b]naphtha-[1,2,d]thiophene S-oxide (1)**

Charge 0 multiplicity 1

SMD-B3LYP/6-31+G(d) solvent=acetonitrile

|   |              |              |              |
|---|--------------|--------------|--------------|
| S | 1.861152000  | -1.726497000 | -0.314001000 |
| C | 1.223279000  | 2.215363000  | 0.023956000  |
| C | 1.036832000  | 0.826092000  | -0.061060000 |
| C | 2.516159000  | 2.752909000  | 0.067310000  |
| H | 2.631795000  | 3.830853000  | 0.142488000  |
| C | 2.204033000  | 0.033522000  | -0.123736000 |
| C | 3.648376000  | 1.936260000  | 0.016066000  |
| H | 4.643200000  | 2.370812000  | 0.054867000  |
| C | 3.492096000  | 0.549667000  | -0.095156000 |
| H | 4.357650000  | -0.105331000 | -0.152460000 |
| H | 0.391091000  | 2.903924000  | 0.062299000  |
| O | 2.361906000  | -2.514066000 | 0.905630000  |
| C | -0.200082000 | -0.003037000 | -0.080514000 |
| C | 0.099920000  | -1.361991000 | -0.153221000 |
| C | -0.856459000 | -2.391948000 | -0.157492000 |
| C | -2.185357000 | -2.043577000 | -0.074236000 |
| C | -2.576297000 | -0.677588000 | -0.012358000 |
| C | -1.588057000 | 0.375941000  | -0.023591000 |
| C | -2.063653000 | 1.717834000  | 0.025759000  |
| C | -3.412727000 | 2.004852000  | 0.088248000  |
| C | -4.374420000 | 0.967310000  | 0.104788000  |
| C | -3.958351000 | -0.344793000 | 0.054601000  |
| H | -0.550857000 | -3.432937000 | -0.217774000 |
| H | -2.956633000 | -2.809597000 | -0.061601000 |
| H | -4.682808000 | -1.155889000 | 0.062135000  |
| H | -5.433185000 | 1.207714000  | 0.155053000  |
| H | -3.736438000 | 3.041874000  | 0.124820000  |
| H | -1.369242000 | 2.544153000  | 0.012955000  |

|                |          |          |          |
|----------------|----------|----------|----------|
| Frequencies -- | 49.1119  | 70.9966  | 103.5204 |
| Frequencies -- | 156.2641 | 170.9699 | 190.7516 |
| Frequencies -- | 215.0759 | 285.5731 | 302.1262 |
| Frequencies -- | 351.3497 | 377.8974 | 411.9059 |
| Frequencies -- | 421.4071 | 442.9906 | 471.9556 |
| Frequencies -- | 506.6525 | 530.1523 | 537.7836 |
| Frequencies -- | 548.2887 | 583.1985 | 621.5512 |
| Frequencies -- | 642.9751 | 675.3703 | 699.3458 |
| Frequencies -- | 720.5849 | 740.9367 | 753.9102 |

|                |           |           |           |
|----------------|-----------|-----------|-----------|
| Frequencies -- | 761.3708  | 791.5345  | 828.3633  |
| Frequencies -- | 832.7575  | 873.9394  | 877.7946  |
| Frequencies -- | 883.7976  | 962.4667  | 973.3107  |
| Frequencies -- | 973.5733  | 982.6636  | 985.4554  |
| Frequencies -- | 1006.8431 | 1010.4912 | 1049.9094 |
| Frequencies -- | 1061.4764 | 1068.6254 | 1133.7549 |
| Frequencies -- | 1153.6872 | 1167.2360 | 1176.0919 |
| Frequencies -- | 1184.8282 | 1191.7239 | 1226.2268 |
| Frequencies -- | 1243.3926 | 1282.8277 | 1328.2449 |
| Frequencies -- | 1354.9882 | 1371.7863 | 1397.4643 |
| Frequencies -- | 1402.5063 | 1467.0975 | 1475.6473 |
| Frequencies -- | 1491.6135 | 1504.4287 | 1555.6707 |
| Frequencies -- | 1602.3735 | 1616.6365 | 1624.5239 |
| Frequencies -- | 1635.9426 | 1664.1269 | 3190.9778 |
| Frequencies -- | 3197.7630 | 3199.1639 | 3200.1403 |
| Frequencies -- | 3204.0899 | 3212.9853 | 3214.1165 |
| Frequencies -- | 3217.7416 | 3262.6917 | 3304.1202 |

|                                              |                             |
|----------------------------------------------|-----------------------------|
| Zero-point correction=                       | 0.211787 (Hartree/Particle) |
| Thermal correction to Energy=                | 0.224861                    |
| Thermal correction to Enthalpy=              | 0.225805                    |
| Thermal correction to Gibbs Free Energy=     | 0.171863                    |
| Sum of electronic and zero-point Energies=   | -1088.941470                |
| Sum of electronic and thermal Energies=      | -1088.928396                |
| Sum of electronic and thermal Enthalpies=    | -1088.927452                |
| Sum of electronic and thermal Free Energies= | -1088.981394                |

Charge 1 multiplicity 2

SMD-B3LYP/6-31+G(d) solvent=acetonitrile

|   |              |              |              |
|---|--------------|--------------|--------------|
| S | 1.904211000  | -1.697297000 | -0.422649000 |
| C | 1.133048000  | 2.221181000  | 0.191613000  |
| C | 0.998293000  | 0.832810000  | -0.035365000 |
| C | 2.401293000  | 2.790428000  | 0.251887000  |
| H | 2.495120000  | 3.856215000  | 0.437034000  |
| C | 2.191223000  | 0.070428000  | -0.167754000 |
| C | 3.556866000  | 2.009947000  | 0.093828000  |
| H | 4.536801000  | 2.475012000  | 0.146054000  |
| C | 3.455503000  | 0.627001000  | -0.119174000 |
| H | 4.346998000  | 0.016990000  | -0.233337000 |
| H | 0.272600000  | 2.853719000  | 0.360573000  |
| O | 2.493527000  | -2.501908000 | 0.730800000  |
| C | -0.195236000 | 0.003581000  | -0.090161000 |
| C | 0.137992000  | -1.381757000 | -0.145304000 |
| C | -0.782359000 | -2.401735000 | -0.025046000 |
| C | -2.132105000 | -2.056107000 | 0.138891000  |
| C | -2.549466000 | -0.706381000 | 0.102725000  |
| C | -1.590639000 | 0.357561000  | -0.059919000 |
| C | -2.087057000 | 1.669068000  | -0.209445000 |
| C | -3.458970000 | 1.938516000  | -0.140121000 |
| C | -4.382142000 | 0.910008000  | 0.069818000  |
| C | -3.930921000 | -0.403239000 | 0.182728000  |
| H | -0.481075000 | -3.444643000 | -0.050465000 |
| H | -2.878251000 | -2.836833000 | 0.256837000  |
| H | -4.635904000 | -1.218195000 | 0.320569000  |
| H | -5.444047000 | 1.128593000  | 0.126288000  |

|   |              |             |              |
|---|--------------|-------------|--------------|
| H | -3.801124000 | 2.961859000 | -0.261853000 |
| H | -1.418657000 | 2.491431000 | -0.420917000 |

|                |           |           |           |
|----------------|-----------|-----------|-----------|
| Frequencies -- | 49.0136   | 65.7750   | 93.1074   |
| Frequencies -- | 146.1442  | 156.8176  | 194.8606  |
| Frequencies -- | 209.5331  | 276.5523  | 292.4457  |
| Frequencies -- | 344.9459  | 373.1607  | 399.7816  |
| Frequencies -- | 413.6438  | 435.1521  | 445.2307  |
| Frequencies -- | 495.6528  | 517.3028  | 524.6910  |
| Frequencies -- | 528.2024  | 546.2172  | 612.3588  |
| Frequencies -- | 634.6918  | 672.7485  | 686.0612  |
| Frequencies -- | 711.5434  | 723.4628  | 756.7823  |
| Frequencies -- | 761.4036  | 791.1236  | 835.6045  |
| Frequencies -- | 849.7112  | 872.3519  | 878.2456  |
| Frequencies -- | 905.4289  | 972.6178  | 975.6840  |
| Frequencies -- | 985.7391  | 998.3813  | 1009.2548 |
| Frequencies -- | 1017.4987 | 1025.2218 | 1048.0371 |
| Frequencies -- | 1065.2531 | 1066.9323 | 1129.5909 |
| Frequencies -- | 1145.1489 | 1153.4923 | 1159.9593 |
| Frequencies -- | 1187.9939 | 1192.7137 | 1235.9889 |
| Frequencies -- | 1264.5726 | 1281.3199 | 1327.5807 |
| Frequencies -- | 1366.5259 | 1394.8510 | 1397.4554 |
| Frequencies -- | 1403.5431 | 1459.5403 | 1469.8393 |
| Frequencies -- | 1481.2684 | 1491.3595 | 1533.9844 |
| Frequencies -- | 1566.2820 | 1585.6139 | 1589.4334 |
| Frequencies -- | 1603.0168 | 1626.6340 | 3213.5376 |
| Frequencies -- | 3216.9104 | 3220.1226 | 3222.6102 |
| Frequencies -- | 3223.1319 | 3229.6707 | 3232.8425 |
| Frequencies -- | 3233.8719 | 3261.2435 | 3285.1430 |

|                                              |                             |
|----------------------------------------------|-----------------------------|
| Zero-point correction=                       | 0.211303 (Hartree/Particle) |
| Thermal correction to Energy=                | 0.224601                    |
| Thermal correction to Enthalpy=              | 0.225545                    |
| Thermal correction to Gibbs Free Energy=     | 0.170379                    |
| Sum of electronic and zero-point Energies=   | -1088.731211                |
| Sum of electronic and thermal Energies=      | -1088.717912                |
| Sum of electronic and thermal Enthalpies=    | -1088.716968                |
| Sum of electronic and thermal Free Energies= | -1088.772135                |

Charge -1 multiplicity 2

SMD-B3LYP/6-31+G(d) solvent=acetonitrile

|   |              |              |              |
|---|--------------|--------------|--------------|
| S | 1.866018000  | -1.770836000 | -0.127015000 |
| C | 1.241725000  | 2.206847000  | -0.040213000 |
| C | 1.023341000  | 0.802845000  | -0.060888000 |
| C | 2.531095000  | 2.731595000  | -0.100021000 |
| H | 2.657621000  | 3.812132000  | -0.085364000 |
| C | 2.203228000  | -0.011190000 | -0.156121000 |
| C | 3.667988000  | 1.900812000  | -0.186862000 |
| H | 4.664785000  | 2.331108000  | -0.234107000 |
| C | 3.491790000  | 0.514348000  | -0.217011000 |
| H | 4.352148000  | -0.149103000 | -0.284787000 |
| H | 0.412981000  | 2.902742000  | 0.001802000  |
| O | 2.238119000  | -2.340879000 | 1.282340000  |
| C | -0.182006000 | 0.005261000  | -0.062570000 |
| C | 0.130017000  | -1.386390000 | -0.222606000 |

|   |              |              |              |
|---|--------------|--------------|--------------|
| C | -0.848396000 | -2.377319000 | -0.379926000 |
| C | -2.185396000 | -2.023633000 | -0.364078000 |
| C | -2.578236000 | -0.658143000 | -0.147991000 |
| C | -1.579008000 | 0.376626000  | 0.022083000  |
| C | -2.048650000 | 1.692602000  | 0.278782000  |
| C | -3.406960000 | 1.997558000  | 0.332755000  |
| C | -4.369827000 | 0.993575000  | 0.138067000  |
| C | -3.950165000 | -0.312541000 | -0.092272000 |
| H | -0.557621000 | -3.418306000 | -0.512464000 |
| H | -2.959726000 | -2.775842000 | -0.495825000 |
| H | -4.685226000 | -1.103755000 | -0.230834000 |
| H | -5.430431000 | 1.231391000  | 0.175385000  |
| H | -3.716487000 | 3.021101000  | 0.532976000  |
| H | -1.342516000 | 2.491816000  | 0.459986000  |

|                |           |           |           |
|----------------|-----------|-----------|-----------|
| Frequencies -- | 56.2275   | 75.9729   | 103.6796  |
| Frequencies -- | 145.1626  | 170.8197  | 181.9589  |
| Frequencies -- | 215.4181  | 287.6793  | 307.3580  |
| Frequencies -- | 333.9029  | 362.8389  | 397.5989  |
| Frequencies -- | 410.6258  | 434.5229  | 473.2093  |
| Frequencies -- | 499.5129  | 515.6834  | 531.6803  |
| Frequencies -- | 533.4134  | 565.3642  | 623.7210  |
| Frequencies -- | 632.6533  | 637.0842  | 693.9056  |
| Frequencies -- | 715.5941  | 718.6254  | 725.3086  |
| Frequencies -- | 736.3813  | 768.0952  | 782.0713  |
| Frequencies -- | 823.9082  | 835.8315  | 858.8180  |
| Frequencies -- | 861.9630  | 879.9785  | 932.0070  |
| Frequencies -- | 935.4641  | 941.5288  | 964.9480  |
| Frequencies -- | 970.1869  | 974.5372  | 1032.9698 |
| Frequencies -- | 1048.8142 | 1059.2462 | 1112.3510 |
| Frequencies -- | 1142.6555 | 1144.9876 | 1158.7287 |
| Frequencies -- | 1172.9770 | 1177.6416 | 1221.3146 |
| Frequencies -- | 1240.2630 | 1273.6880 | 1322.3814 |
| Frequencies -- | 1338.6391 | 1352.9324 | 1372.4859 |
| Frequencies -- | 1389.5199 | 1451.4323 | 1460.2258 |
| Frequencies -- | 1476.3373 | 1481.5815 | 1524.7056 |
| Frequencies -- | 1542.9954 | 1567.4759 | 1583.6094 |
| Frequencies -- | 1601.7773 | 1621.9800 | 3168.7822 |
| Frequencies -- | 3170.4466 | 3175.8680 | 3181.1900 |
| Frequencies -- | 3181.6728 | 3189.0282 | 3198.7500 |
| Frequencies -- | 3202.7858 | 3231.9014 | 3267.9216 |

|                                              |                             |
|----------------------------------------------|-----------------------------|
| Zero-point correction=                       | 0.208355 (Hartree/Particle) |
| Thermal correction to Energy=                | 0.221698                    |
| Thermal correction to Enthalpy=              | 0.222642                    |
| Thermal correction to Gibbs Free Energy=     | 0.167750                    |
| Sum of electronic and zero-point Energies=   | -1089.038800                |
| Sum of electronic and thermal Energies=      | -1089.025458                |
| Sum of electronic and thermal Enthalpies=    | -1089.024514                |
| Sum of electronic and thermal Free Energies= | -1089.079405                |

**Benzo[b]naphtho[2,1,d]-thiophene S-oxide (2),**

Charge 0 multiplicity 1

SMD-B3LYP/6-31+G(d) solvent=acetonitrile

|   |              |              |              |
|---|--------------|--------------|--------------|
| C | -4.486093000 | -0.120748000 | -0.058706000 |
| C | -4.192862000 | 1.245044000  | 0.041152000  |
| C | -3.451306000 | -1.061784000 | -0.159873000 |
| H | -5.004363000 | 1.964649000  | 0.110665000  |
| H | -3.672794000 | -2.122172000 | -0.249087000 |
| C | -2.868868000 | 1.700331000  | 0.053472000  |
| C | -2.143719000 | -0.594276000 | -0.134608000 |
| H | -2.655218000 | 2.763020000  | 0.129043000  |
| H | -5.519561000 | -0.455908000 | -0.064079000 |
| C | -1.827725000 | 0.770019000  | -0.026906000 |
| S | -0.668997000 | -1.639233000 | -0.289562000 |
| C | -0.375886000 | 1.008099000  | -0.003325000 |
| H | 2.182539000  | 3.244582000  | 0.182274000  |
| C | 1.664969000  | 2.291180000  | 0.108695000  |
| C | 0.287554000  | 2.257240000  | 0.085420000  |
| C | 0.369568000  | -0.161247000 | -0.077435000 |
| C | 1.788164000  | -0.174326000 | -0.069233000 |
| C | 2.445955000  | 1.101656000  | 0.036890000  |
| C | 3.867044000  | 1.143564000  | 0.061569000  |
| C | 4.609685000  | -0.015937000 | -0.021844000 |
| C | 3.959672000  | -1.271197000 | -0.134025000 |
| C | 2.582411000  | -1.352384000 | -0.155013000 |
| H | -0.288003000 | 3.176986000  | 0.137255000  |
| H | 2.102577000  | -2.323664000 | -0.233978000 |
| H | 4.553466000  | -2.179003000 | -0.202753000 |
| H | 5.695512000  | 0.027830000  | -0.004030000 |
| H | 4.357831000  | 2.110554000  | 0.144959000  |
| O | -0.552427000 | -2.571317000 | 0.925669000  |

|                |           |           |           |
|----------------|-----------|-----------|-----------|
| Frequencies -- | 51.3517   | 84.3327   | 108.0562  |
| Frequencies -- | 141.8266  | 157.9743  | 183.7313  |
| Frequencies -- | 216.0193  | 278.9798  | 318.7201  |
| Frequencies -- | 335.7321  | 372.2082  | 404.6943  |
| Frequencies -- | 435.3382  | 454.6258  | 468.6168  |
| Frequencies -- | 511.1104  | 522.2685  | 538.7145  |
| Frequencies -- | 556.9310  | 573.2885  | 589.2766  |
| Frequencies -- | 667.9003  | 676.9626  | 686.7164  |
| Frequencies -- | 727.1775  | 739.2991  | 758.1668  |
| Frequencies -- | 768.6690  | 784.3946  | 827.2329  |
| Frequencies -- | 838.7651  | 880.5670  | 886.9846  |
| Frequencies -- | 890.6027  | 968.0590  | 971.8170  |
| Frequencies -- | 973.8345  | 983.8329  | 989.6952  |
| Frequencies -- | 1007.3152 | 1009.1966 | 1045.0148 |
| Frequencies -- | 1048.0178 | 1061.0751 | 1104.0957 |
| Frequencies -- | 1149.6386 | 1160.6959 | 1181.2743 |
| Frequencies -- | 1184.4494 | 1195.1082 | 1245.1180 |
| Frequencies -- | 1277.4732 | 1291.9736 | 1329.3710 |
| Frequencies -- | 1365.0711 | 1381.9331 | 1391.4535 |
| Frequencies -- | 1406.5902 | 1463.3317 | 1482.6853 |
| Frequencies -- | 1495.4224 | 1510.9837 | 1557.8761 |
| Frequencies -- | 1601.3357 | 1620.4748 | 1633.6325 |
| Frequencies -- | 1637.2611 | 1665.5756 | 3189.3712 |
| Frequencies -- | 3195.6572 | 3196.6474 | 3197.9873 |
| Frequencies -- | 3204.5340 | 3207.5177 | 3211.0869 |
| Frequencies -- | 3215.3367 | 3215.8436 | 3220.1781 |

Zero-point correction=

0.211601 (Hartree/Particle)

Thermal correction to Energy=

0.224694

|                                              |              |
|----------------------------------------------|--------------|
| Thermal correction to Enthalpy=              | 0.225638     |
| Thermal correction to Gibbs Free Energy=     | 0.171805     |
| Sum of electronic and zero-point Energies=   | -1088.947187 |
| Sum of electronic and thermal Energies=      | -1088.934094 |
| Sum of electronic and thermal Enthalpies=    | -1088.933150 |
| Sum of electronic and thermal Free Energies= | -1088.986983 |

Charge 1 multiplicity 2

SMD-B3LYP/6-31+G(d) solvent=acetonitrile

|   |              |              |              |
|---|--------------|--------------|--------------|
| C | -4.460445000 | -0.132437000 | -0.000178000 |
| C | -4.178512000 | 1.242396000  | 0.075150000  |
| C | -3.427274000 | -1.077647000 | -0.112232000 |
| H | -4.996366000 | 1.952330000  | 0.154271000  |
| H | -3.653050000 | -2.137669000 | -0.184893000 |
| C | -2.865806000 | 1.704584000  | 0.051709000  |
| C | -2.126522000 | -0.606726000 | -0.126833000 |
| H | -2.652090000 | 2.767025000  | 0.115891000  |
| H | -5.491911000 | -0.471885000 | 0.018437000  |
| C | -1.817139000 | 0.770287000  | -0.041773000 |
| S | -0.661470000 | -1.660221000 | -0.324659000 |
| C | -0.393970000 | 1.029933000  | -0.039931000 |
| H | 2.154016000  | 3.259827000  | 0.164239000  |
| C | 1.637096000  | 2.307452000  | 0.087193000  |
| C | 0.256980000  | 2.274796000  | 0.042409000  |
| C | 0.377027000  | -0.168018000 | -0.112363000 |
| C | 1.776437000  | -0.167548000 | -0.073777000 |
| C | 2.424510000  | 1.114434000  | 0.038830000  |
| C | 3.824150000  | 1.165650000  | 0.085764000  |
| C | 4.587861000  | -0.012696000 | 0.022775000  |
| C | 3.963887000  | -1.261608000 | -0.093909000 |
| C | 2.577206000  | -1.348132000 | -0.140009000 |
| H | -0.317439000 | 3.194175000  | 0.082296000  |
| H | 2.105795000  | -2.322254000 | -0.220954000 |
| H | 4.561349000  | -2.166203000 | -0.146176000 |
| H | 5.671084000  | 0.051225000  | 0.061794000  |
| H | 4.319204000  | 2.129252000  | 0.166410000  |
| O | -0.506248000 | -2.587575000 | 0.875786000  |

|                |           |           |           |
|----------------|-----------|-----------|-----------|
| Frequencies -- | 44.3305   | 87.9886   | 99.9112   |
| Frequencies -- | 142.1289  | 154.9806  | 185.3147  |
| Frequencies -- | 203.8465  | 270.0169  | 306.0252  |
| Frequencies -- | 328.2950  | 367.2587  | 394.1634  |
| Frequencies -- | 419.1641  | 435.9071  | 452.1489  |
| Frequencies -- | 500.4867  | 515.9006  | 522.4324  |
| Frequencies -- | 529.8045  | 552.3195  | 579.8990  |
| Frequencies -- | 648.9683  | 663.5830  | 675.8580  |
| Frequencies -- | 720.1571  | 727.7603  | 742.9568  |
| Frequencies -- | 770.5206  | 786.2631  | 820.1354  |
| Frequencies -- | 843.4092  | 886.2366  | 891.9660  |
| Frequencies -- | 898.1780  | 971.1576  | 982.0897  |
| Frequencies -- | 983.8156  | 1002.4144 | 1007.1782 |
| Frequencies -- | 1019.4119 | 1021.1825 | 1042.5560 |
| Frequencies -- | 1052.7646 | 1062.0117 | 1099.0373 |
| Frequencies -- | 1145.1035 | 1155.2212 | 1174.9093 |
| Frequencies -- | 1186.1270 | 1199.4934 | 1246.5663 |



|                |           |           |           |
|----------------|-----------|-----------|-----------|
| Frequencies -- | 1282.7842 | 1292.8159 | 1338.8492 |
| Frequencies -- | 1364.5453 | 1384.0352 | 1399.8859 |
| Frequencies -- | 1430.6839 | 1463.4620 | 1474.6137 |
| Frequencies -- | 1488.4778 | 1508.9205 | 1522.2026 |
| Frequencies -- | 1561.9731 | 1576.1025 | 1594.2146 |
| Frequencies -- | 1600.9909 | 1626.6675 | 3214.5358 |
| Frequencies -- | 3216.8538 | 3219.9896 | 3221.0916 |
| Frequencies -- | 3222.8856 | 3227.6491 | 3229.9276 |
| Frequencies -- | 3233.0260 | 3237.6995 | 3239.9782 |

|                                              |                             |
|----------------------------------------------|-----------------------------|
| Zero-point correction=                       | 0.211173 (Hartree/Particle) |
| Thermal correction to Energy=                | 0.224482                    |
| Thermal correction to Enthalpy=              | 0.225426                    |
| Thermal correction to Gibbs Free Energy=     | 0.170415                    |
| Sum of electronic and zero-point Energies=   | -1088.732775                |
| Sum of electronic and thermal Energies=      | -1088.719466                |
| Sum of electronic and thermal Enthalpies=    | -1088.718522                |
| Sum of electronic and thermal Free Energies= | -1088.773534                |

Charge -1 multiplicity 2

SMD-B3LYP/6-31+G(d) solvent=acetonitrile

|   |              |              |              |
|---|--------------|--------------|--------------|
| C | -4.475470000 | -0.146194000 | -0.273148000 |
| C | -4.204084000 | 1.226054000  | -0.061820000 |
| C | -3.421210000 | -1.061964000 | -0.333560000 |
| H | -5.029326000 | 1.933124000  | -0.012668000 |
| H | -3.621056000 | -2.120659000 | -0.488144000 |
| C | -2.898410000 | 1.689036000  | 0.080825000  |
| C | -2.113018000 | -0.597549000 | -0.184274000 |
| H | -2.711425000 | 2.749923000  | 0.234046000  |
| H | -5.500970000 | -0.488052000 | -0.387454000 |
| C | -1.816842000 | 0.782684000  | 0.019158000  |
| S | -0.652953000 | -1.647742000 | -0.158985000 |
| C | -0.399613000 | 1.019988000  | 0.094241000  |
| H | 2.189720000  | 3.237084000  | 0.280143000  |
| C | 1.667596000  | 2.286886000  | 0.188288000  |
| C | 0.286338000  | 2.248905000  | 0.218479000  |
| C | 0.358661000  | -0.183643000 | -0.059327000 |
| C | 1.785531000  | -0.186366000 | -0.085734000 |
| C | 2.454021000  | 1.090063000  | 0.030867000  |
| C | 3.865838000  | 1.131328000  | -0.011568000 |
| C | 4.626753000  | -0.027699000 | -0.160592000 |
| C | 3.978477000  | -1.271720000 | -0.262414000 |
| C | 2.589064000  | -1.350798000 | -0.219132000 |
| H | -0.278509000 | 3.173535000  | 0.323933000  |
| H | 2.110545000  | -2.324936000 | -0.285429000 |
| H | 4.563560000  | -2.182850000 | -0.368790000 |
| H | 5.712317000  | 0.029575000  | -0.189820000 |
| H | 4.358728000  | 2.098484000  | 0.075637000  |
| O | -0.631015000 | -2.454426000 | 1.185070000  |

|                |          |          |          |
|----------------|----------|----------|----------|
| Frequencies -- | 50.4269  | 76.5655  | 114.5992 |
| Frequencies -- | 139.3644 | 150.9371 | 173.8440 |
| Frequencies -- | 212.9859 | 275.2516 | 307.5852 |
| Frequencies -- | 313.7621 | 369.4627 | 393.5837 |

|                |           |           |           |
|----------------|-----------|-----------|-----------|
| Frequencies -- | 421.1713  | 437.5382  | 467.3018  |
| Frequencies -- | 507.8700  | 511.5497  | 522.4813  |
| Frequencies -- | 545.4537  | 556.6827  | 587.8088  |
| Frequencies -- | 626.8499  | 666.5175  | 684.9557  |
| Frequencies -- | 715.4669  | 724.8318  | 734.4555  |
| Frequencies -- | 744.1543  | 760.6353  | 790.3697  |
| Frequencies -- | 816.1526  | 850.8072  | 851.6728  |
| Frequencies -- | 856.0665  | 882.6935  | 927.8677  |
| Frequencies -- | 943.0526  | 946.0674  | 969.1723  |
| Frequencies -- | 970.4345  | 972.8696  | 1024.0289 |
| Frequencies -- | 1045.5173 | 1050.4605 | 1076.5281 |
| Frequencies -- | 1138.4470 | 1142.4037 | 1151.0234 |
| Frequencies -- | 1173.0932 | 1176.2003 | 1234.2756 |
| Frequencies -- | 1251.4496 | 1280.2495 | 1326.4824 |
| Frequencies -- | 1330.4730 | 1354.6581 | 1376.2766 |
| Frequencies -- | 1395.6551 | 1450.2288 | 1467.3162 |
| Frequencies -- | 1472.1468 | 1484.5049 | 1517.6882 |
| Frequencies -- | 1545.7321 | 1570.4697 | 1576.9321 |
| Frequencies -- | 1605.5058 | 1616.0089 | 3167.5735 |
| Frequencies -- | 3170.1572 | 3175.2148 | 3176.0469 |
| Frequencies -- | 3179.8670 | 3187.3165 | 3188.7966 |
| Frequencies -- | 3190.6829 | 3200.0375 | 3203.2983 |

|                                              |                             |
|----------------------------------------------|-----------------------------|
| Zero-point correction=                       | 0.207869 (Hartree/Particle) |
| Thermal correction to Energy=                | 0.221301                    |
| Thermal correction to Enthalpy=              | 0.222245                    |
| Thermal correction to Gibbs Free Energy=     | 0.167133                    |
| Sum of electronic and zero-point Energies=   | -1089.043024                |
| Sum of electronic and thermal Energies=      | -1089.029593                |
| Sum of electronic and thermal Enthalpies=    | -1089.028648                |
| Sum of electronic and thermal Free Energies= | -1089.083761                |

### Benzo[b]phenanthro[9,10-d]thiophene S-oxide (3)

Charge 0 multiplicity 1

SMD-B3LYP/6-31+G(d) solvent=acetonitrile

|   |              |              |              |
|---|--------------|--------------|--------------|
| S | -1.377951000 | -1.995596000 | -0.389736000 |
| C | -4.744481000 | 0.270552000  | 0.078688000  |
| C | -4.162881000 | 1.528387000  | 0.254841000  |
| C | -3.925355000 | -0.843884000 | -0.140115000 |
| H | -4.793939000 | 2.393170000  | 0.441485000  |
| H | -4.354260000 | -1.834617000 | -0.265979000 |
| C | -2.773963000 | 1.705979000  | 0.205498000  |
| C | -2.552149000 | -0.648711000 | -0.172969000 |
| H | -2.385328000 | 2.699546000  | 0.378362000  |
| C | -1.930644000 | 0.606835000  | -0.022738000 |
| H | -5.823505000 | 0.152209000  | 0.120538000  |
| C | 1.720039000  | -2.603673000 | -0.155636000 |
| C | 3.048211000  | -2.973779000 | -0.054063000 |
| C | 1.340073000  | -1.237944000 | -0.092085000 |
| C | 4.037587000  | -1.986745000 | 0.123997000  |
| C | 2.339396000  | -0.229991000 | 0.060720000  |
| C | 3.688124000  | -0.647373000 | 0.178980000  |
| C | -0.025031000 | -0.816081000 | -0.136603000 |

|   |              |              |              |
|---|--------------|--------------|--------------|
| C | -0.446282000 | 0.495503000  | -0.071489000 |
| C | 0.557857000  | 1.544369000  | -0.051578000 |
| C | 1.941756000  | 1.174910000  | 0.051805000  |
| H | 0.961249000  | -3.371281000 | -0.270789000 |
| H | 3.325119000  | -4.023445000 | -0.103776000 |
| H | 5.081791000  | -2.273975000 | 0.215712000  |
| H | 4.476178000  | 0.084458000  | 0.313245000  |
| C | 0.235213000  | 2.921014000  | -0.166061000 |
| C | 2.910642000  | 2.207376000  | 0.105560000  |
| C | 2.558985000  | 3.543772000  | 0.030167000  |
| C | 1.208964000  | 3.903325000  | -0.124449000 |
| H | -0.788515000 | 3.226414000  | -0.321033000 |
| H | 3.961851000  | 1.957242000  | 0.189178000  |
| H | 3.329850000  | 4.309046000  | 0.069610000  |
| H | 0.925948000  | 4.948180000  | -0.220898000 |
| O | -1.503199000 | -2.977556000 | 0.784416000  |

|                |           |           |           |
|----------------|-----------|-----------|-----------|
| Frequencies -- | 36.5796   | 62.1082   | 92.7288   |
| Frequencies -- | 101.1351  | 112.0611  | 156.9968  |
| Frequencies -- | 170.8813  | 219.1725  | 234.7822  |
| Frequencies -- | 257.3649  | 283.4789  | 324.3791  |
| Frequencies -- | 331.5362  | 384.1034  | 405.8176  |
| Frequencies -- | 414.2917  | 437.8619  | 452.4896  |
| Frequencies -- | 458.1405  | 484.5536  | 508.5964  |
| Frequencies -- | 531.7645  | 565.4661  | 579.1500  |
| Frequencies -- | 611.1260  | 625.3928  | 639.1012  |
| Frequencies -- | 661.9855  | 684.1086  | 712.5043  |
| Frequencies -- | 731.8317  | 739.0568  | 759.0111  |
| Frequencies -- | 761.2791  | 768.8994  | 777.9502  |
| Frequencies -- | 785.1526  | 807.7903  | 875.1828  |
| Frequencies -- | 876.3471  | 885.6904  | 903.2411  |
| Frequencies -- | 965.1054  | 968.6756  | 973.9500  |
| Frequencies -- | 978.8445  | 985.9605  | 1005.2415 |
| Frequencies -- | 1008.3459 | 1009.1947 | 1013.9964 |
| Frequencies -- | 1057.8151 | 1070.3914 | 1070.7179 |
| Frequencies -- | 1077.5326 | 1128.2965 | 1155.1978 |
| Frequencies -- | 1164.9486 | 1182.3046 | 1187.0937 |
| Frequencies -- | 1190.1638 | 1204.2794 | 1257.9091 |
| Frequencies -- | 1264.6303 | 1298.5252 | 1312.6088 |
| Frequencies -- | 1338.0650 | 1359.9960 | 1368.8895 |
| Frequencies -- | 1382.1641 | 1393.6577 | 1448.0640 |
| Frequencies -- | 1472.3429 | 1480.2487 | 1487.5732 |
| Frequencies -- | 1502.3390 | 1534.5655 | 1564.6511 |
| Frequencies -- | 1606.9808 | 1609.2395 | 1620.8014 |
| Frequencies -- | 1636.5889 | 1651.8100 | 1658.1340 |
| Frequencies -- | 3196.6167 | 3197.4809 | 3198.9171 |
| Frequencies -- | 3205.8807 | 3207.3410 | 3210.5384 |
| Frequencies -- | 3218.3616 | 3218.6453 | 3223.6488 |
| Frequencies -- | 3240.1812 | 3264.7403 | 3301.6844 |

|                                              |                             |
|----------------------------------------------|-----------------------------|
| Zero-point correction=                       | 0.258670 (Hartree/Particle) |
| Thermal correction to Energy=                | 0.274530                    |
| Thermal correction to Enthalpy=              | 0.275474                    |
| Thermal correction to Gibbs Free Energy=     | 0.215299                    |
| Sum of electronic and zero-point Energies=   | -1242.543998                |
| Sum of electronic and thermal Energies=      | -1242.528138                |
| Sum of electronic and thermal Enthalpies=    | -1242.527194                |
| Sum of electronic and thermal Free Energies= | -1242.587369                |

Charge 1 multiplicity 2

SMD-B3LYP/6-31+G(d) solvent=acetonitrile

|   |              |              |              |
|---|--------------|--------------|--------------|
| S | 1.392100000  | -1.978921000 | 0.575178000  |
| C | 4.673674000  | 0.312967000  | -0.257079000 |
| C | 4.063600000  | 1.550477000  | -0.514359000 |
| C | 3.899159000  | -0.803589000 | 0.091258000  |
| H | 4.673906000  | 2.396362000  | -0.816040000 |
| H | 4.365129000  | -1.768453000 | 0.268856000  |
| C | 2.684857000  | 1.710089000  | -0.409825000 |
| C | 2.530256000  | -0.633659000 | 0.182027000  |
| H | 2.244706000  | 2.663646000  | -0.670856000 |
| C | 1.884278000  | 0.610133000  | -0.030418000 |
| H | 5.751348000  | 0.211203000  | -0.344806000 |
| C | -1.703237000 | -2.626975000 | 0.112129000  |
| C | -3.016554000 | -2.991958000 | -0.080585000 |
| C | -1.321499000 | -1.247188000 | 0.079614000  |
| C | -3.983689000 | -1.995261000 | -0.321414000 |
| C | -2.319496000 | -0.225293000 | -0.129018000 |
| C | -3.639914000 | -0.642024000 | -0.342175000 |
| C | 0.012421000  | -0.839709000 | 0.199361000  |
| C | 0.439581000  | 0.510717000  | 0.099429000  |
| C | -0.550973000 | 1.548645000  | 0.117483000  |
| C | -1.928957000 | 1.184556000  | -0.050485000 |
| H | -0.948786000 | -3.390615000 | 0.264896000  |
| H | -3.303654000 | -4.038529000 | -0.060318000 |
| H | -5.018567000 | -2.278919000 | -0.490518000 |
| H | -4.426102000 | 0.081188000  | -0.522209000 |
| C | -0.215466000 | 2.910220000  | 0.333619000  |
| C | -2.883493000 | 2.214330000  | -0.097051000 |
| C | -2.519792000 | 3.552435000  | 0.062601000  |
| C | -1.185369000 | 3.901212000  | 0.301784000  |
| H | 0.803456000  | 3.182458000  | 0.574490000  |
| H | -3.932870000 | 1.984110000  | -0.236603000 |
| H | -3.288002000 | 4.319851000  | 0.029433000  |
| H | -0.908815000 | 4.936579000  | 0.476253000  |
| O | 1.524790000  | -3.079611000 | -0.469601000 |

|                |           |           |           |
|----------------|-----------|-----------|-----------|
| Frequencies -- | 40.1855   | 65.3719   | 91.8885   |
| Frequencies -- | 103.9334  | 118.2903  | 147.9171  |
| Frequencies -- | 173.8078  | 213.2284  | 234.4350  |
| Frequencies -- | 252.7394  | 271.7522  | 306.9994  |
| Frequencies -- | 336.7396  | 382.6190  | 398.0860  |
| Frequencies -- | 413.4499  | 427.1201  | 444.7762  |
| Frequencies -- | 450.0329  | 466.5782  | 498.5784  |
| Frequencies -- | 518.4560  | 543.0153  | 557.9486  |
| Frequencies -- | 602.5174  | 612.1872  | 631.2666  |
| Frequencies -- | 668.6770  | 676.8280  | 700.7430  |
| Frequencies -- | 712.3172  | 733.1653  | 753.2967  |
| Frequencies -- | 757.6182  | 775.1545  | 781.3825  |
| Frequencies -- | 789.2527  | 809.4970  | 885.2221  |
| Frequencies -- | 890.5276  | 899.9405  | 903.5788  |
| Frequencies -- | 971.8204  | 981.6684  | 985.4166  |
| Frequencies -- | 992.2676  | 1007.9829 | 1014.1492 |
| Frequencies -- | 1018.0533 | 1020.4483 | 1021.5758 |

|                |           |           |           |
|----------------|-----------|-----------|-----------|
| Frequencies -- | 1053.0601 | 1065.6811 | 1068.9868 |
| Frequencies -- | 1080.6845 | 1127.7151 | 1156.8196 |
| Frequencies -- | 1164.7004 | 1181.6616 | 1187.2247 |
| Frequencies -- | 1196.5071 | 1199.9218 | 1258.0580 |
| Frequencies -- | 1268.6975 | 1302.0134 | 1320.7216 |
| Frequencies -- | 1338.3034 | 1353.3076 | 1369.2084 |
| Frequencies -- | 1392.3367 | 1411.0590 | 1442.2133 |
| Frequencies -- | 1465.9490 | 1474.0845 | 1481.3080 |
| Frequencies -- | 1488.3817 | 1503.8126 | 1552.6528 |
| Frequencies -- | 1561.6059 | 1584.6643 | 1594.7743 |
| Frequencies -- | 1609.0572 | 1623.3750 | 1638.2905 |
| Frequencies -- | 3212.6636 | 3213.8217 | 3217.1442 |
| Frequencies -- | 3219.7694 | 3225.8191 | 3228.2524 |
| Frequencies -- | 3229.6010 | 3239.7071 | 3241.2865 |
| Frequencies -- | 3254.8063 | 3256.0654 | 3273.0895 |

|                                              |                             |
|----------------------------------------------|-----------------------------|
| Zero-point correction=                       | 0.258306 (Hartree/Particle) |
| Thermal correction to Energy=                | 0.274292                    |
| Thermal correction to Enthalpy=              | 0.275236                    |
| Thermal correction to Gibbs Free Energy=     | 0.214312                    |
| Sum of electronic and zero-point Energies=   | -1242.334565                |
| Sum of electronic and thermal Energies=      | -1242.318579                |
| Sum of electronic and thermal Enthalpies=    | -1242.317635                |
| Sum of electronic and thermal Free Energies= | -1242.378560                |

Charge -1 multiplicity 2

SMD-B3LYP/6-31+G(d) solvent=acetonitrile

|   |              |              |              |
|---|--------------|--------------|--------------|
| S | 1.364077000  | -2.046291000 | 0.085981000  |
| C | 4.734904000  | 0.210625000  | -0.409434000 |
| C | 4.164341000  | 1.498973000  | -0.415302000 |
| C | 3.896654000  | -0.899214000 | -0.268765000 |
| H | 4.805308000  | 2.368663000  | -0.543250000 |
| H | 4.309795000  | -1.906112000 | -0.271164000 |
| C | 2.791362000  | 1.694036000  | -0.272259000 |
| C | 2.525632000  | -0.701590000 | -0.124645000 |
| H | 2.418751000  | 2.709305000  | -0.319022000 |
| C | 1.911148000  | 0.592015000  | -0.107843000 |
| H | 5.807846000  | 0.080088000  | -0.522355000 |
| C | -1.739625000 | -2.620806000 | -0.145210000 |
| C | -3.072530000 | -2.968955000 | -0.298611000 |
| C | -1.326914000 | -1.258464000 | -0.091306000 |
| C | -4.054543000 | -1.967388000 | -0.395372000 |
| C | -2.332459000 | -0.235154000 | -0.150557000 |
| C | -3.677060000 | -0.628087000 | -0.316211000 |
| C | 0.038634000  | -0.861754000 | -0.009049000 |
| C | 0.470098000  | 0.497581000  | 0.005070000  |
| C | -0.535329000 | 1.534221000  | 0.085886000  |
| C | -1.928736000 | 1.176590000  | -0.007799000 |
| H | -0.992652000 | -3.406723000 | -0.071679000 |
| H | -3.353809000 | -4.018866000 | -0.344376000 |
| H | -5.101611000 | -2.230225000 | -0.523033000 |
| H | -4.455952000 | 0.123934000  | -0.387653000 |
| C | -0.220178000 | 2.906768000  | 0.285384000  |
| C | -2.894598000 | 2.202992000  | 0.067667000  |
| C | -2.551009000 | 3.541783000  | 0.233467000  |

|   |              |              |             |
|---|--------------|--------------|-------------|
| C | -1.198025000 | 3.890106000  | 0.353104000 |
| H | 0.809476000  | 3.205150000  | 0.423685000 |
| H | -3.948700000 | 1.954023000  | 0.007248000 |
| H | -3.327560000 | 4.300814000  | 0.286896000 |
| H | -0.907589000 | 4.926376000  | 0.511794000 |
| O | 1.512607000  | -2.623930000 | 1.533490000 |

|                |           |           |           |
|----------------|-----------|-----------|-----------|
| Frequencies -- | 38.3458   | 60.4295   | 90.1472   |
| Frequencies -- | 94.7591   | 112.0657  | 144.7052  |
| Frequencies -- | 177.4788  | 199.3511  | 240.8142  |
| Frequencies -- | 265.7798  | 285.9294  | 326.2483  |
| Frequencies -- | 329.7623  | 360.0541  | 401.8035  |
| Frequencies -- | 405.9241  | 420.6221  | 438.3829  |
| Frequencies -- | 450.9847  | 491.4248  | 507.3510  |
| Frequencies -- | 528.9269  | 544.8354  | 573.4450  |
| Frequencies -- | 608.9113  | 611.1192  | 624.1698  |
| Frequencies -- | 638.1127  | 679.2227  | 708.2530  |
| Frequencies -- | 721.0108  | 723.7079  | 736.7001  |
| Frequencies -- | 746.0509  | 758.2125  | 759.3966  |
| Frequencies -- | 771.4730  | 810.6472  | 843.8173  |
| Frequencies -- | 848.7399  | 856.9433  | 864.1403  |
| Frequencies -- | 904.1192  | 940.6267  | 943.6501  |
| Frequencies -- | 946.4373  | 972.0423  | 976.0459  |
| Frequencies -- | 977.8249  | 981.6884  | 1002.8262 |
| Frequencies -- | 1040.3522 | 1054.2152 | 1070.6474 |
| Frequencies -- | 1075.9852 | 1120.6424 | 1146.8708 |
| Frequencies -- | 1154.1662 | 1171.3067 | 1179.0394 |
| Frequencies -- | 1186.0055 | 1190.6674 | 1251.5486 |
| Frequencies -- | 1252.8808 | 1290.9059 | 1299.6319 |
| Frequencies -- | 1327.1537 | 1338.6945 | 1346.3086 |
| Frequencies -- | 1371.8784 | 1385.7175 | 1423.2784 |
| Frequencies -- | 1461.1265 | 1467.6835 | 1477.3471 |
| Frequencies -- | 1485.0934 | 1511.2837 | 1528.2958 |
| Frequencies -- | 1569.4809 | 1581.5536 | 1588.5744 |
| Frequencies -- | 1603.5721 | 1627.6265 | 1633.9797 |
| Frequencies -- | 3178.1536 | 3179.2856 | 3182.7857 |
| Frequencies -- | 3183.9411 | 3191.5116 | 3197.2572 |
| Frequencies -- | 3201.1819 | 3203.3251 | 3210.3866 |
| Frequencies -- | 3227.8676 | 3237.2108 | 3274.6405 |

|                                              |                             |
|----------------------------------------------|-----------------------------|
| Zero-point correction=                       | 0.255443 (Hartree/Particle) |
| Thermal correction to Energy=                | 0.271578                    |
| Thermal correction to Enthalpy=              | 0.272522                    |
| Thermal correction to Gibbs Free Energy=     | 0.211200                    |
| Sum of electronic and zero-point Energies=   | -1242.644566                |
| Sum of electronic and thermal Energies=      | -1242.628430                |
| Sum of electronic and thermal Enthalpies=    | -1242.627486                |
| Sum of electronic and thermal Free Energies= | -1242.688808                |

**Dinaphtho[2,1-b:2',1'-d]thiophene S-oxide (4)**

Charge 0 multiplicity 1

SMD-B3LYP/6-31+G(d) solvent=acetonitrile

|   |              |             |             |
|---|--------------|-------------|-------------|
| H | -4.502281000 | 1.236388000 | 0.749293000 |
| C | -3.467138000 | 1.017592000 | 0.499933000 |

|   |              |              |              |
|---|--------------|--------------|--------------|
| C | -2.541215000 | 2.034245000  | 0.399881000  |
| C | -1.204356000 | 1.690513000  | 0.136474000  |
| C | -0.745479000 | 0.380669000  | -0.016247000 |
| C | -1.738053000 | -0.652985000 | -0.139314000 |
| C | -3.103547000 | -0.321733000 | 0.189157000  |
| C | -4.102086000 | -1.334346000 | 0.117811000  |
| C | -3.800127000 | -2.599230000 | -0.337092000 |
| C | -2.482502000 | -2.895805000 | -0.764816000 |
| C | -1.480967000 | -1.951789000 | -0.665456000 |
| H | -2.831105000 | 3.072945000  | 0.534442000  |
| H | -0.491783000 | -2.193827000 | -1.033868000 |
| H | -2.258842000 | -3.873112000 | -1.184958000 |
| H | -4.574920000 | -3.358891000 | -0.400952000 |
| H | -5.120201000 | -1.075488000 | 0.399029000  |
| C | 0.738251000  | 0.327027000  | -0.131575000 |
| C | 1.267406000  | 1.587477000  | -0.390951000 |
| C | 2.623867000  | 1.844312000  | -0.649341000 |
| C | 3.502684000  | 0.783517000  | -0.604471000 |
| C | 3.060079000  | -0.507935000 | -0.205345000 |
| C | 1.667804000  | -0.749479000 | 0.088542000  |
| C | 1.327644000  | -1.997688000 | 0.685314000  |
| C | 2.277085000  | -2.978433000 | 0.888616000  |
| C | 3.623641000  | -2.773760000 | 0.500240000  |
| C | 4.004478000  | -1.557924000 | -0.023739000 |
| H | 2.966581000  | 2.849334000  | -0.879731000 |
| H | 4.557565000  | 0.932382000  | -0.820487000 |
| H | 5.044001000  | -1.366289000 | -0.279504000 |
| H | 4.356943000  | -3.562373000 | 0.647421000  |
| H | 1.988615000  | -3.913165000 | 1.362619000  |
| H | 0.315381000  | -2.170315000 | 1.027479000  |
| S | 0.045772000  | 2.917235000  | -0.291494000 |
| O | 0.406609000  | 3.835148000  | 0.884676000  |

|                |           |           |           |
|----------------|-----------|-----------|-----------|
| Frequencies -- | 56.7175   | 64.9562   | 79.9369   |
| Frequencies -- | 92.7365   | 156.8958  | 179.8438  |
| Frequencies -- | 188.1865  | 195.4311  | 240.5224  |
| Frequencies -- | 246.6912  | 293.5123  | 328.5037  |
| Frequencies -- | 345.6536  | 395.4843  | 409.6054  |
| Frequencies -- | 426.7417  | 460.0075  | 467.8857  |
| Frequencies -- | 499.3311  | 518.1482  | 532.7712  |
| Frequencies -- | 541.3763  | 547.1980  | 552.4979  |
| Frequencies -- | 591.8829  | 611.3022  | 632.4513  |
| Frequencies -- | 650.5165  | 663.4926  | 689.6149  |
| Frequencies -- | 709.4573  | 758.3849  | 765.0730  |
| Frequencies -- | 782.9742  | 795.4168  | 805.7894  |
| Frequencies -- | 825.1269  | 826.5335  | 846.8069  |
| Frequencies -- | 864.5811  | 883.7283  | 885.5779  |
| Frequencies -- | 895.6180  | 954.0206  | 970.8213  |
| Frequencies -- | 972.9183  | 983.0261  | 985.5661  |
| Frequencies -- | 994.5688  | 1007.5842 | 1017.2540 |
| Frequencies -- | 1050.0714 | 1051.4010 | 1068.8976 |
| Frequencies -- | 1147.9090 | 1161.3853 | 1163.3151 |
| Frequencies -- | 1171.6471 | 1174.5957 | 1183.9746 |
| Frequencies -- | 1187.3087 | 1213.6070 | 1242.1838 |
| Frequencies -- | 1245.7836 | 1281.6260 | 1304.1958 |
| Frequencies -- | 1359.7823 | 1367.1709 | 1387.0184 |
| Frequencies -- | 1392.2051 | 1399.3571 | 1418.4913 |
| Frequencies -- | 1464.8825 | 1465.3514 | 1480.8050 |

|                |           |           |           |
|----------------|-----------|-----------|-----------|
| Frequencies -- | 1489.7678 | 1550.1350 | 1553.9030 |
| Frequencies -- | 1593.2510 | 1607.4755 | 1614.0273 |
| Frequencies -- | 1618.7332 | 1661.3861 | 1662.9404 |
| Frequencies -- | 3189.5194 | 3190.6612 | 3196.8438 |
| Frequencies -- | 3197.7429 | 3197.9539 | 3198.7745 |
| Frequencies -- | 3210.9313 | 3211.8075 | 3212.4201 |
| Frequencies -- | 3212.7141 | 3239.3487 | 3249.2142 |

|                                              |              |                    |
|----------------------------------------------|--------------|--------------------|
| Zero-point correction=                       | 0.258420     | (Hartree/Particle) |
| Thermal correction to Energy=                | 0.274061     |                    |
| Thermal correction to Enthalpy=              | 0.275005     |                    |
| Thermal correction to Gibbs Free Energy=     | 0.215661     |                    |
| Sum of electronic and zero-point Energies=   | -1242.533068 |                    |
| Sum of electronic and thermal Energies=      | -1242.517427 |                    |
| Sum of electronic and thermal Enthalpies=    | -1242.516483 |                    |
| Sum of electronic and thermal Free Energies= | -1242.575827 |                    |

Charge 1 multiplicity 2

SMD-B3LYP/6-31+G(d) solvent=acetonitrile

|   |              |              |              |
|---|--------------|--------------|--------------|
| H | -4.445168000 | 1.224174000  | 0.836266000  |
| C | -3.421271000 | 1.003788000  | 0.547196000  |
| C | -2.495974000 | 2.040121000  | 0.417219000  |
| C | -1.191978000 | 1.708083000  | 0.090122000  |
| C | -0.725886000 | 0.373331000  | -0.062276000 |
| C | -1.727014000 | -0.663064000 | -0.169769000 |
| C | -3.075957000 | -0.329499000 | 0.211302000  |
| C | -4.085656000 | -1.323941000 | 0.160359000  |
| C | -3.806261000 | -2.591461000 | -0.325667000 |
| C | -2.513671000 | -2.886993000 | -0.793141000 |
| C | -1.492461000 | -1.945366000 | -0.712153000 |
| H | -2.795316000 | 3.073105000  | 0.567872000  |
| H | -0.516403000 | -2.198929000 | -1.107222000 |
| H | -2.304502000 | -3.860105000 | -1.228323000 |
| H | -4.588515000 | -3.343391000 | -0.373830000 |
| H | -5.090831000 | -1.061439000 | 0.478707000  |
| C | 0.723896000  | 0.319597000  | -0.118318000 |
| C | 1.273066000  | 1.604143000  | -0.364758000 |
| C | 2.613409000  | 1.843561000  | -0.623054000 |
| C | 3.488689000  | 0.760709000  | -0.580598000 |
| C | 3.043493000  | -0.527911000 | -0.193119000 |
| C | 1.652111000  | -0.769433000 | 0.094929000  |
| C | 1.309669000  | -2.011733000 | 0.673786000  |
| C | 2.268658000  | -2.997008000 | 0.881866000  |
| C | 3.608778000  | -2.792049000 | 0.508283000  |
| C | 3.991691000  | -1.567495000 | -0.013202000 |
| H | 2.974724000  | 2.840573000  | -0.856319000 |
| H | 4.542717000  | 0.906928000  | -0.800315000 |
| H | 5.030604000  | -1.371366000 | -0.263987000 |
| H | 4.342852000  | -3.578750000 | 0.655488000  |
| H | 1.972539000  | -3.934803000 | 1.343277000  |
| H | 0.295255000  | -2.200447000 | 1.000059000  |
| S | 0.060261000  | 2.949304000  | -0.313295000 |
| O | 0.374236000  | 3.853913000  | 0.873376000  |

|                |         |         |         |
|----------------|---------|---------|---------|
| Frequencies -- | 47.7957 | 65.4814 | 80.0550 |
|----------------|---------|---------|---------|



|                |           |           |           |
|----------------|-----------|-----------|-----------|
| Frequencies -- | 93.2138   | 153.0331  | 172.5113  |
| Frequencies -- | 186.7799  | 190.4763  | 234.1656  |
| Frequencies -- | 241.5986  | 293.2400  | 324.0191  |
| Frequencies -- | 346.2864  | 389.9102  | 403.0972  |
| Frequencies -- | 412.6481  | 444.2533  | 466.5040  |
| Frequencies -- | 485.3519  | 505.5732  | 519.1644  |
| Frequencies -- | 530.5806  | 536.9689  | 546.9424  |
| Frequencies -- | 563.1276  | 605.9157  | 629.0128  |
| Frequencies -- | 645.9546  | 659.6121  | 687.7206  |
| Frequencies -- | 703.6300  | 761.8118  | 772.8586  |
| Frequencies -- | 774.4760  | 794.9580  | 795.7775  |
| Frequencies -- | 842.0454  | 844.4228  | 851.2679  |
| Frequencies -- | 867.5428  | 885.8933  | 899.2958  |
| Frequencies -- | 912.5619  | 953.5897  | 983.5642  |
| Frequencies -- | 988.2294  | 995.9221  | 1006.1340 |
| Frequencies -- | 1011.1949 | 1018.4284 | 1026.8387 |
| Frequencies -- | 1060.0512 | 1061.3407 | 1080.2838 |
| Frequencies -- | 1148.2312 | 1154.9089 | 1162.1985 |
| Frequencies -- | 1165.5760 | 1171.9041 | 1186.2980 |
| Frequencies -- | 1186.8694 | 1218.2110 | 1256.6226 |
| Frequencies -- | 1261.8613 | 1290.3331 | 1313.6406 |
| Frequencies -- | 1326.9456 | 1356.7395 | 1382.0173 |
| Frequencies -- | 1394.6115 | 1402.9006 | 1429.7285 |
| Frequencies -- | 1462.4256 | 1464.6237 | 1473.2083 |
| Frequencies -- | 1481.7329 | 1538.9057 | 1543.3964 |
| Frequencies -- | 1564.8149 | 1573.0865 | 1576.6345 |
| Frequencies -- | 1603.5685 | 1623.0344 | 1628.3242 |
| Frequencies -- | 3207.5740 | 3208.1003 | 3213.6853 |
| Frequencies -- | 3214.0913 | 3215.5206 | 3216.8895 |
| Frequencies -- | 3225.9190 | 3226.4768 | 3227.6136 |
| Frequencies -- | 3229.1199 | 3245.9974 | 3255.9298 |

|                                              |                             |
|----------------------------------------------|-----------------------------|
| Zero-point correction=                       | 0.258306 (Hartree/Particle) |
| Thermal correction to Energy=                | 0.274098                    |
| Thermal correction to Enthalpy=              | 0.275042                    |
| Thermal correction to Gibbs Free Energy=     | 0.214613                    |
| Sum of electronic and zero-point Energies=   | -1242.330524                |
| Sum of electronic and thermal Energies=      | -1242.314733                |
| Sum of electronic and thermal Enthalpies=    | -1242.313789                |
| Sum of electronic and thermal Free Energies= | -1242.374218                |

Charge -1 multiplicity 2

SMD-B3LYP/6-31+G(d) solvent=acetonitrile

**Dinaphtho[1,2-b:2',1'-d]thiophene S-oxide (5)**

Charge 0 multiplicity 1

SMD-B3LYP/6-31+G(d) solvent=acetonitrile

|   |              |              |              |
|---|--------------|--------------|--------------|
| S | -0.000027000 | -1.331674000 | -0.203454000 |
| H | 5.588127000  | 1.532808000  | 0.048186000  |
| C | 4.942572000  | 0.659245000  | -0.005446000 |
| C | 5.481724000  | -0.608110000 | -0.080419000 |
| C | 4.631624000  | -1.741069000 | -0.155095000 |

|   |              |              |              |
|---|--------------|--------------|--------------|
| C | 3.259909000  | -1.594530000 | -0.147947000 |
| C | 2.673005000  | -0.299813000 | -0.069265000 |
| C | 3.533560000  | 0.852608000  | -0.000526000 |
| C | 2.960716000  | 2.155445000  | 0.061407000  |
| C | 1.595819000  | 2.349589000  | 0.061120000  |
| C | 0.735605000  | 1.224828000  | 0.009721000  |
| C | 1.277696000  | -0.051067000 | -0.051352000 |
| H | 6.559955000  | -0.743900000 | -0.085343000 |
| H | 5.066653000  | -2.735105000 | -0.217796000 |
| H | 2.624245000  | -2.473871000 | -0.199558000 |
| H | 1.181997000  | 3.352884000  | 0.102166000  |
| H | 3.629723000  | 3.011470000  | 0.106488000  |
| H | -3.629761000 | 3.011326000  | 0.108672000  |
| C | -2.960742000 | 2.155344000  | 0.062881000  |
| C | -1.595840000 | 2.349563000  | 0.062485000  |
| C | -0.735599000 | 1.224894000  | 0.010083000  |
| C | -1.277678000 | -0.051009000 | -0.051102000 |
| C | -2.672957000 | -0.299839000 | -0.069159000 |
| C | -3.533550000 | 0.852551000  | 0.000046000  |
| C | -4.942566000 | 0.659223000  | -0.005253000 |
| C | -5.481701000 | -0.608083000 | -0.081022000 |
| C | -4.631569000 | -1.741008000 | -0.156102000 |
| C | -3.259859000 | -1.594509000 | -0.148557000 |
| H | -1.182116000 | 3.352860000  | 0.104479000  |
| H | -2.624220000 | -2.473855000 | -0.200491000 |
| H | -5.066584000 | -2.735010000 | -0.219433000 |
| H | -6.559928000 | -0.743881000 | -0.086286000 |
| H | -5.588109000 | 1.532776000  | 0.048722000  |
| O | -0.000071000 | -2.243404000 | 1.033309000  |

|                |           |           |           |
|----------------|-----------|-----------|-----------|
| Frequencies -- | 35.7963   | 56.1720   | 81.0218   |
| Frequencies -- | 107.1821  | 110.3786  | 165.7576  |
| Frequencies -- | 175.3400  | 209.1342  | 211.4721  |
| Frequencies -- | 259.2890  | 266.9917  | 331.4945  |
| Frequencies -- | 338.0057  | 383.6176  | 409.6936  |
| Frequencies -- | 442.1089  | 442.7569  | 482.6167  |
| Frequencies -- | 482.8015  | 499.8096  | 526.4092  |
| Frequencies -- | 541.4990  | 543.1349  | 551.9435  |
| Frequencies -- | 579.1495  | 583.1843  | 644.1851  |
| Frequencies -- | 656.8977  | 668.7285  | 690.4417  |
| Frequencies -- | 690.6082  | 753.9688  | 763.1503  |
| Frequencies -- | 778.6164  | 783.2697  | 816.9003  |
| Frequencies -- | 829.6535  | 833.4242  | 835.7574  |
| Frequencies -- | 842.5755  | 880.2371  | 880.5999  |
| Frequencies -- | 928.8292  | 971.3929  | 971.4651  |
| Frequencies -- | 971.7600  | 976.1910  | 987.3268  |
| Frequencies -- | 991.4115  | 1006.3442 | 1007.9339 |
| Frequencies -- | 1007.9513 | 1044.0094 | 1047.5549 |
| Frequencies -- | 1138.7465 | 1153.6343 | 1160.3918 |
| Frequencies -- | 1172.2264 | 1181.9555 | 1183.3549 |
| Frequencies -- | 1205.7476 | 1241.3870 | 1250.2844 |
| Frequencies -- | 1279.6528 | 1283.4280 | 1343.8368 |
| Frequencies -- | 1362.5932 | 1373.9397 | 1393.4295 |
| Frequencies -- | 1395.7199 | 1401.8302 | 1415.8453 |
| Frequencies -- | 1462.3765 | 1471.4683 | 1489.4982 |
| Frequencies -- | 1506.6968 | 1552.4797 | 1560.1808 |
| Frequencies -- | 1597.8347 | 1605.2233 | 1627.0053 |
| Frequencies -- | 1636.6509 | 1663.5457 | 1667.4408 |

|                |           |           |           |
|----------------|-----------|-----------|-----------|
| Frequencies -- | 3188.6474 | 3188.7025 | 3193.8432 |
| Frequencies -- | 3195.4589 | 3196.0196 | 3196.7833 |
| Frequencies -- | 3205.5927 | 3205.6482 | 3209.4308 |
| Frequencies -- | 3214.4407 | 3214.4761 | 3220.0035 |

|                                              |                             |
|----------------------------------------------|-----------------------------|
| Zero-point correction=                       | 0.258083 (Hartree/Particle) |
| Thermal correction to Energy=                | 0.273987                    |
| Thermal correction to Enthalpy=              | 0.274931                    |
| Thermal correction to Gibbs Free Energy=     | 0.214546                    |
| Sum of electronic and zero-point Energies=   | -1242.550606                |
| Sum of electronic and thermal Energies=      | -1242.534703                |
| Sum of electronic and thermal Enthalpies=    | -1242.533758                |
| Sum of electronic and thermal Free Energies= | -1242.594143                |

Charge 1 multiplicity 2

SMD-B3LYP/6-31+G(d) solvent=acetonitrile

|   |              |              |              |
|---|--------------|--------------|--------------|
| S | -0.000038000 | -1.355004000 | -0.219127000 |
| H | 5.560326000  | 1.530267000  | 0.054194000  |
| C | 4.907387000  | 0.663314000  | 0.003329000  |
| C | 5.448130000  | -0.619325000 | -0.071439000 |
| C | 4.609550000  | -1.750017000 | -0.147170000 |
| C | 3.234621000  | -1.601091000 | -0.141958000 |
| C | 2.652667000  | -0.300520000 | -0.066388000 |
| C | 3.513531000  | 0.854364000  | 0.006892000  |
| C | 2.941646000  | 2.165583000  | 0.066566000  |
| C | 1.581440000  | 2.368187000  | 0.056447000  |
| C | 0.721593000  | 1.245207000  | 0.000394000  |
| C | 1.270103000  | -0.056118000 | -0.065913000 |
| H | 6.526479000  | -0.748652000 | -0.073473000 |
| H | 5.044954000  | -2.742794000 | -0.207077000 |
| H | 2.599020000  | -2.480023000 | -0.187128000 |
| H | 1.170478000  | 3.371297000  | 0.096208000  |
| H | 3.616511000  | 3.015701000  | 0.117838000  |
| H | -3.616477000 | 3.015917000  | 0.114283000  |
| C | -2.941630000 | 2.165711000  | 0.064203000  |
| C | -1.581434000 | 2.368275000  | 0.054280000  |
| C | -0.721590000 | 1.245231000  | -0.000260000 |
| C | -1.270074000 | -0.056167000 | -0.066141000 |
| C | -2.652621000 | -0.300511000 | -0.066432000 |
| C | -3.513500000 | 0.854442000  | 0.005864000  |
| C | -4.907361000 | 0.663370000  | 0.002774000  |
| C | -5.448106000 | -0.619316000 | -0.070582000 |
| C | -4.609517000 | -1.750107000 | -0.145433000 |
| C | -3.234633000 | -1.601174000 | -0.140719000 |
| H | -1.170449000 | 3.371417000  | 0.093067000  |
| H | -2.599038000 | -2.480151000 | -0.185127000 |
| H | -5.044943000 | -2.742945000 | -0.204156000 |
| H | -6.526452000 | -0.748664000 | -0.072163000 |
| H | -5.560279000 | 1.530385000  | 0.052905000  |
| O | -0.000092000 | -2.230964000 | 1.029596000  |

|                |          |          |          |
|----------------|----------|----------|----------|
| Frequencies -- | 28.7786  | 41.5571  | 80.3589  |
| Frequencies -- | 103.2365 | 112.0229 | 166.6936 |
| Frequencies -- | 172.5025 | 197.9836 | 202.9667 |
| Frequencies -- | 257.7950 | 263.0531 | 323.4764 |

|                |           |           |           |
|----------------|-----------|-----------|-----------|
| Frequencies -- | 335.1161  | 380.4935  | 398.5997  |
| Frequencies -- | 428.4470  | 432.6519  | 476.6225  |
| Frequencies -- | 478.8060  | 479.9995  | 517.0272  |
| Frequencies -- | 521.0699  | 534.8467  | 544.5896  |
| Frequencies -- | 566.1854  | 580.9088  | 637.0062  |
| Frequencies -- | 650.5919  | 658.3164  | 675.8414  |
| Frequencies -- | 684.3963  | 741.1546  | 757.5329  |
| Frequencies -- | 778.3234  | 778.5643  | 812.5790  |
| Frequencies -- | 824.5160  | 828.3845  | 833.6081  |
| Frequencies -- | 840.8672  | 892.0857  | 892.7776  |
| Frequencies -- | 931.7462  | 969.0698  | 980.6255  |
| Frequencies -- | 981.2644  | 997.3790  | 999.6984  |
| Frequencies -- | 1005.2817 | 1014.1089 | 1017.9344 |
| Frequencies -- | 1018.3056 | 1050.4645 | 1053.8119 |
| Frequencies -- | 1125.5893 | 1147.6486 | 1155.5450 |
| Frequencies -- | 1168.8038 | 1179.6242 | 1183.9573 |
| Frequencies -- | 1212.5095 | 1249.9316 | 1252.2922 |
| Frequencies -- | 1286.4714 | 1290.3477 | 1307.1286 |
| Frequencies -- | 1338.8908 | 1380.4672 | 1391.7062 |
| Frequencies -- | 1392.2094 | 1402.7721 | 1436.7290 |
| Frequencies -- | 1458.7120 | 1471.1212 | 1475.9316 |
| Frequencies -- | 1503.3145 | 1519.3456 | 1551.3094 |
| Frequencies -- | 1555.3954 | 1572.5935 | 1583.6849 |
| Frequencies -- | 1608.3593 | 1618.3018 | 1632.9408 |
| Frequencies -- | 3208.3926 | 3208.4439 | 3212.7329 |
| Frequencies -- | 3214.0528 | 3214.6185 | 3215.3555 |
| Frequencies -- | 3221.5512 | 3221.6046 | 3227.2835 |
| Frequencies -- | 3229.4859 | 3230.1306 | 3242.5303 |

|                                              |                             |
|----------------------------------------------|-----------------------------|
| Zero-point correction=                       | 0.257505 (Hartree/Particle) |
| Thermal correction to Energy=                | 0.273630                    |
| Thermal correction to Enthalpy=              | 0.274574                    |
| Thermal correction to Gibbs Free Energy=     | 0.212700                    |
| Sum of electronic and zero-point Energies=   | -1242.341441                |
| Sum of electronic and thermal Energies=      | -1242.325317                |
| Sum of electronic and thermal Enthalpies=    | -1242.324373                |
| Sum of electronic and thermal Free Energies= | -1242.386247                |

Charge -1 multiplicity 2

SMD-B3LYP/6-31+G(d) solvent=acetonitrile

|   |              |              |              |
|---|--------------|--------------|--------------|
| S | 0.040730000  | 1.174347000  | -0.027006000 |
| H | -5.335626000 | -2.014808000 | -0.005160000 |
| C | -4.749394000 | -1.098333000 | -0.011110000 |
| C | -5.374175000 | 0.133517000  | -0.024772000 |
| C | -4.601430000 | 1.319652000  | -0.030223000 |
| C | -3.219437000 | 1.265248000  | -0.023581000 |
| C | -2.552494000 | 0.008739000  | -0.012591000 |
| C | -3.332514000 | -1.198717000 | -0.004217000 |
| C | -2.679512000 | -2.471571000 | 0.011785000  |
| C | -1.310257000 | -2.575545000 | 0.019035000  |
| C | -0.511029000 | -1.397139000 | 0.007799000  |
| C | -1.133257000 | -0.142914000 | -0.008705000 |
| H | -6.459640000 | 0.195543000  | -0.030145000 |
| H | -5.099488000 | 2.285587000  | -0.038877000 |
| H | -2.653348000 | 2.200338000  | -0.024138000 |

|   |              |              |              |
|---|--------------|--------------|--------------|
| H | -0.831682000 | -3.551188000 | 0.032214000  |
| H | -3.295996000 | -3.367490000 | 0.018990000  |
| H | 3.965485000  | -2.870119000 | 0.047064000  |
| C | 3.232388000  | -2.066971000 | 0.030791000  |
| C | 1.889545000  | -2.356673000 | 0.030035000  |
| C | 0.935868000  | -1.299208000 | 0.009515000  |
| C | 1.380173000  | 0.027468000  | -0.009376000 |
| C | 2.765115000  | 0.368601000  | -0.010958000 |
| C | 3.704951000  | -0.716979000 | 0.010729000  |
| C | 5.093841000  | -0.417229000 | 0.011004000  |
| C | 5.541229000  | 0.889691000  | -0.009137000 |
| C | 4.611435000  | 1.957531000  | -0.030661000 |
| C | 3.253387000  | 1.702628000  | -0.031269000 |
| H | 1.549947000  | -3.388793000 | 0.045516000  |
| H | 2.551915000  | 2.533601000  | -0.047775000 |
| H | 4.968364000  | 2.984117000  | -0.046696000 |
| H | 6.607306000  | 1.102206000  | -0.008717000 |
| H | 5.803234000  | -1.241956000 | 0.027407000  |
| O | -2.511092000 | 4.344081000  | 0.114733000  |

|                |           |           |           |
|----------------|-----------|-----------|-----------|
| Frequencies -- | 37.3307   | 47.7925   | 70.9238   |
| Frequencies -- | 73.5198   | 82.7252   | 115.9224  |
| Frequencies -- | 121.8788  | 137.0085  | 211.9632  |
| Frequencies -- | 219.4258  | 248.0865  | 251.2902  |
| Frequencies -- | 261.9561  | 328.8624  | 396.8445  |
| Frequencies -- | 421.2293  | 423.2901  | 426.6297  |
| Frequencies -- | 484.5523  | 502.4613  | 503.3689  |
| Frequencies -- | 529.9297  | 541.0514  | 547.3831  |
| Frequencies -- | 558.5498  | 563.7775  | 592.5640  |
| Frequencies -- | 648.4096  | 648.9110  | 676.5860  |
| Frequencies -- | 692.3105  | 698.9166  | 754.5974  |
| Frequencies -- | 764.6564  | 776.0884  | 784.0834  |
| Frequencies -- | 818.8014  | 824.2580  | 836.7690  |
| Frequencies -- | 838.0170  | 843.5254  | 879.8478  |
| Frequencies -- | 884.3098  | 942.5790  | 969.7264  |
| Frequencies -- | 970.9501  | 981.9587  | 982.8144  |
| Frequencies -- | 983.1250  | 1003.8787 | 1005.3420 |
| Frequencies -- | 1012.5153 | 1048.6750 | 1051.9742 |
| Frequencies -- | 1143.8928 | 1154.8381 | 1161.2620 |
| Frequencies -- | 1176.4999 | 1181.6812 | 1182.6989 |
| Frequencies -- | 1190.5390 | 1238.6536 | 1242.4176 |
| Frequencies -- | 1283.4652 | 1287.3703 | 1331.3600 |
| Frequencies -- | 1365.6400 | 1367.3800 | 1386.2020 |
| Frequencies -- | 1391.4052 | 1408.1962 | 1421.0272 |
| Frequencies -- | 1462.0499 | 1468.8852 | 1487.7748 |
| Frequencies -- | 1499.0767 | 1550.5156 | 1558.7663 |
| Frequencies -- | 1583.6381 | 1595.5164 | 1631.7137 |
| Frequencies -- | 1636.4246 | 1658.6721 | 1662.9989 |
| Frequencies -- | 3096.4587 | 3182.8972 | 3184.6063 |
| Frequencies -- | 3187.2060 | 3188.9204 | 3191.4959 |
| Frequencies -- | 3196.9549 | 3200.0501 | 3207.7821 |
| Frequencies -- | 3209.3865 | 3210.7989 | 3211.4133 |

|                                            |                             |
|--------------------------------------------|-----------------------------|
| Zero-point correction=                     | 0.255160 (Hartree/Particle) |
| Thermal correction to Energy=              | 0.272118                    |
| Thermal correction to Enthalpy=            | 0.273062                    |
| Thermal correction to Gibbs Free Energy=   | 0.208816                    |
| Sum of electronic and zero-point Energies= | -1242.632950                |

|                                              |              |
|----------------------------------------------|--------------|
| Sum of electronic and thermal Energies=      | -1242.615993 |
| Sum of electronic and thermal Enthalpies=    | -1242.615049 |
| Sum of electronic and thermal Free Energies= | -1242.679295 |

## References

- (1) Nelsen, S. F.; Luo, Y.; Weaver, M. N.; Lockard, J. V.; Zink, J. I. *J Org Chem* **2006**, *71* (11), 4286–4295.
- (2) Rungtaweevoranit, B.; Butsuri, A.; Wongma, K.; Sadorn, K.; Neranon, K.; Nerungsi, C.; Thongpanchang, T. *Tetrahedron Letters* **2012**, *53* (14), 1816–1818.
- (3) Rafiq, S. M.; Sivasakthikumar, R.; Mohanakrishnan, A. K. *Org Lett* **2014**, *16* (10), 2720–2723.
- (4) Tominaga, Y.; Lee, M. L.; Castle, R. N. *J. Heterocyclic Chem.* **1981**, *18* (5), 967–972.
- (5) de Lucas, N. C.; Albuquerque, A. C. C.; Santos, A. C. A. S.; Garden, S. J.; Nicodem, D. E. *J Photoch Photobio A* **2007**, *188* (2–3), 293–297.
- (6) Buquet, A.; Couture, A.; Lablache-Combier, A.; Pollet, A. *Tetrahedron* **1981**, *37* (1), 75–81.
- (7) Sadorn, K.; Sinananwanich, W.; Areephong, J.; Nerungsi, C.; Wongma, C.; Pakawatchai, C.; Thongpanchang, T. *Tetrahedron Letters* **2008**, *49* (29–30), 4519–4521.
